# Supplementary material for: The kinase inhibitor SI113 induces autophagy and synergizes with quinacrine in hindering the growth of human glioblastoma multiforme cells
Source: Springer Nature journal article supplement (doi:10.1186/s13046-019-1212-1), 2019-05-17
Supplement: MOESM1 [file 16732056]

Supplementary Table S1. Complete list of antibodies used for RPPA analysis and their main related information. Antibodies highlighted in yellow have been selected for RPPA data analyses.

| RPPA endpoint name             | Item Name                                                                  | Vendor                    | Catalog        | Raised in  | Recognizes          | Antigen             | Cell Signaling Technology Pathway       |
|--------------------------------|----------------------------------------------------------------------------|---------------------------|----------------|------------|---------------------|---------------------|-----------------------------------------|
| 4E-BP1 pT37/46                 | Phospho-4E-BP1 (Thr37/46) Antibody                                         | Cell Signaling Technology | 9459           | Rabbit     | H M R Mk            | EIF4EBP1            | Translational Control                   |
| 4E-BP1 pT70                    | Phospho-4E-BP1 (Thr70) Antibody                                            | Cell Signaling Technology | 9455           | Rabbit     | H M R Mk            | EIF4EBP1            | Translational Control                   |
| A-RAF pS299                    | Phospho-A-Raf (Ser299) Antibody                                            | Cell Signaling Technology | 4431           | Rabbit     | H M R               | ARAF                | MAP Kinase Signaling                    |
| ACACA pS79                     | Phospho-Acetyl-CoA Carboxylase (Ser79) Antibody                            | Cell Signaling Technology | 3661           | Rabbit     | H M R Mk            | ACACA/ACACB         | Metabolism                              |
| AKT pS473                      | Phospho-Akt (Ser473) Antibody (disponibile anche come XP® Monoclonal       | Cell Signaling Technology | 9271           | Rabbit     | H M R Hm Dm B Dg Pg | AKT1  AKT2  AKT3    | PI3K / Akt Signaling                    |
| AKT pT308                      | Phospho-Akt (Thr308) Antibody                                              | Cell Signaling Technology | 9275           | Rabbit     | H M R Hm            | AKT1                | PI3K / Akt Signaling                    |
| ALDH                           | Purified Mouse Anti-ALDH Clone 44/ALDH                                     | BD                        | 611194         | Mouse      | H                   | ALDH1A1             | Metabolism                              |
| ALK                            | ALK (D5F3®) XP® Rabbit mAb                                                 | Cell Signaling Technology | 3633           | Rabbit mAb | H                   | ALK                 | RTK                                     |
| ALK pY1586                     | Phospho-ALK (Tyr1586) Antibody                                             | Cell Signaling Technology | 3343           | Rabbit     | H                   | ALK                 | RTK                                     |
| ALK pY1604                     | Phospho-ALK (Tyr1604) Antibody                                             | Cell Signaling Technology | 3341           | Rabbit     | H                   | ALK                 | RTK                                     |
| AMPKα pS485                    | Phospho-AMPK-alpha-1 (Ser485) Antibody                                     | Cell Signaling Technology | 4184           | Rabbit     | H M R Mk            | PRKAA1              | Metabolism                              |
| AMPKα pT172                    | Phospho-AMPKα (Thr172) (40H9) Rabbit mAb                                   | Cell Signaling Technology | 2535           | Rabbit     | H M R Hm Mk Dm Sc   | PRKAA1 PRKAA2       | Metabolism                              |
| AMPKβ pS108                    | Phospho-AMPK-beta-1 (Ser108) Antibody                                      | Cell Signaling Technology | 4181           | Rabbit     | H M R Mk            | PRKAB1 PRKAB2       | Metabolism                              |
| Androgen-R pS650               | Anti-Androgen Receptor (phospho S650) antibody                             | Abcam                     | ab47563        | Rabbit     | H M                 | AR                  | Nuclear Receptor Signaling CTR          |
| Androgen-R pS81                | Anti-phospho-Androgen Receptor (Ser81) Antibody                            | Millipore                 | 07-1375        | Rabbit     | H                   | AR                  | Nuclear Receptor Signaling              |
| AndrRec                        | Androgen Receptor Antibody                                                 | Cell Signaling Technology | 3202           | Rabbit     | H                   | AR                  | Nuclear Receptor Signaling              |
| ASK1 pS83                      | Phospho-ASK1 (Ser83) Antibody                                              | Cell Signaling Technology | 3761           | Rabbit     | H                   | MAP3K5              | MAP Kinase Signaling                    |
| ATP-Citrate Lyase pS454        | Phospho-ATP-Citrate Lyase (Ser454) Antibody                                | Cell Signaling Technology | 4331           | Rabbit     | H M                 | ACLY                | Metabolism                              |
| b-Catenin pS33-37/pT41         | Phospho-beta-Catenin (Ser33/37/Thr41) Antibody                             | Cell Signaling Technology | 9561           | Rabbit     | H M R Mk            | CTNNB1              | Developmental Biology                   |
| b-Catenin pT41/pS45            | Phospho-beta-Catenin (Thr41/Ser45) Antibody                                | Cell Signaling Technology | 9565           | Rabbit     | H M Mk              | CTNNB1              | Developmental Biology                   |
| BAD pS112                      | Phospho-Bad (Ser112) Antibody                                              | Cell Signaling Technology | 9291           | Rabbit     | H M R Mk            | BAD                 | Apoptosis                               |
| BAD pS136                      | Phospho-Bad (Ser136) Antibody                                              | Cell Signaling Technology | 9295           | Rabbit     | M                   | BAD                 | Apoptosis                               |
| BAD pS155                      | Phospho-Bad (Ser155) Antibody                                              | Cell Signaling Technology | 9297           | Rabbit     | M                   | BAD                 | Apoptosis                               |
| c-ABL pT735                    | Phospho-c-Abl (Thr735) Antibody                                            | Cell Signaling Technology | 2864           | Rabbit     | H                   | ABL1 BCR/ABL        | MAP Kinase Signaling                    |
| c-ABL pY245                    | Phospho-c-Abl (Tyr245) Antibody                                            | Cell Signaling Technology | 2861           | Rabbit     | H                   | ABL1 EGFR PDGFRA    | MAP Kinase Signaling                    |
| c-KIT pY719                    | Phospho-c-Kit (Tyr719) Antibody                                            | Cell Signaling Technology | 3391           | Rabbit     | H M                 | KIT                 | RTK                                     |
| c-Met                          | Met (D1C2) XP® Rabbit mAb                                                  | Cell Signaling Technology | 8198           | Rabbit mAb | H                   | MET                 | RTK                                     |
| c-Met pY1234                   | Phospho-Met (Tyr1234/1235) Antibody (disponibile anche come XP® Monoclonal | Cell Signaling Technology | 3126           | Rabbit     | H M R Mk            | MET                 | RTK                                     |
| c-Myc pS62                     | Phospho-c-Myc (Ser62) (E1J4K) Rabbit mAb                                   | Cell Signaling Technology | 13748          | Rabbit     | H M R               | MYC                 | Apoptosis                               |
| c-Myc pT58/pS62                | Anti-phospho-c-Myc (Thr58/Ser62) Antibody                                  | Millipore                 | 04-217         | Rabbit     | H M                 | MYC                 | Apoptosis                               |
| C-RAF pS259                    | Phospho-c-Raf (Ser259) Antibody                                            | Cell Signaling Technology | 9421           | Rabbit     | H M R Mk X          | RAF1                | MAP Kinase Signaling                    |
| C-RAF pS338                    | Phospho-c-Raf (Ser338) (56A6) Rabbit mAb                                   | Cell Signaling Technology | 9427           | Rabbit mAb | H M R Mk            | RAF1                | MAP Kinase Signaling                    |
| COX-2                          | Purified Mouse Anti-Cox-2 Clone 33/Cox-2                                   | BD                        | 610203         | Mouse      | H M C               | PTGS2               | Immunology and Inflammation             |
| Cyclin B1                      | Cyclin B1 (V152) Mouse mAb                                                 | Cell Signaling Technology | 4135           | Mouse      | H M                 | CCNB1               | Cell Cycle / Checkpoint Control         |
| Cyclin D1                      | Cyclin D1 (DCS6) Mouse mAb                                                 | Cell Signaling Technology | 2926           | Mouse      | NA                  | CCND1               | Cell Cycle / Checkpoint Control         |
| E-Cadherin                     | E-Cadherin (24E10) Rabbit mAb                                              | Cell Signaling Technology | 3195           | Rabbit     | H M                 | CDH1                | Adhesion/ECM                            |
| EGFR                           | EGF Receptor Antibody (disponibile anche come XP® Monoclonal Antibody      | Cell Signaling Technology | 2232           | Rabbit     | H M R Mk            | EGFR                | RTK                                     |
| EGFR pY1045                    | Phospho-EGF Receptor (Tyr1045) Antibody                                    | Cell Signaling Technology | 2237           | Rabbit     | H R                 | EGFR                | RTK                                     |
| EGFR pY1068                    | Phospho-EGF Receptor (Tyr1068) Antibody (disponibile anche come XP®        | Cell Signaling Technology | 2234           | Rabbit     | H M R               | EGFR                | RTK                                     |
| EGFR pY1148                    | Phospho-EGF Receptor (Tyr1148) Antibody                                    | Cell Signaling Technology | 4404           | Rabbit     | H Mk                | EGFR                | RTK                                     |
| EGFR pY1173                    | Phospho-EGF Receptor (Tyr1173) (53A5) Rabbit mAb                           | Cell Signaling Technology | 4407           | Rabbit mAb | H M R               | EGFR                | RTK                                     |
| EGFR pY845 MILK                | Phospho-EGF Receptor (Tyr845) Antibody                                     | Cell Signaling Technology | 2231           | Rabbit     | H M R               | EGFR                | RTK                                     |
| EGFR pY992                     | Phospho-EGF Receptor (Tyr992) Antibody                                     | Cell Signaling Technology | 2235           | Rabbit     | H M Mk              | EGFR                | RTK                                     |
| ErbB2 pY1248                   | Phospho-HER2/ErbB2 (Tyr1248) Antibody                                      | Cell Signaling Technology | 2247           | Rabbit     | H M                 | ERBB2               | RTK                                     |
| ERG                            | ERG antibody [EPR3864(2)]                                                  | Epitomics/Abcam           | 5115-1/ab13326 | Rabbit mAb | H M                 | ERG                 | N.A.                                    |
| ERK1-2 pT202-pY204             | Phospho-p44/42 MAPK (Erk1/2) (Thr202/Tyr204) Antibody (disponibile anche   | Cell Signaling Technology | 9101           | Rabbit     | H M R Hm Mk Mi Dm Z | MAPK3 MAPK1         | MAP Kinase Signaling                    |
| Estr-R alpha pS118             | Phospho-Estrogen Receptor a (Ser118) (16J4) Mouse mAb                      | Cell Signaling Technology | 2511           | Mouse      | H                   | ESR1                | Nuclear Receptor Signaling              |
| Fatty Acid Synthase            | Fatty Acid Synthase Antibody                                               | Cell Signaling Technology | 3189           | Rabbit     | H M                 | FASN                | Metabolism                              |
| Fodrin-a_c_D1185               | Cleaved alpha-Fodrin (Asp1185) Antibody                                    | Cell Signaling Technology | 2121           | Rabbit     | H                   | SPTAN1              | Apoptosis                               |
| FOXO1 pS256                    | Phospho-FoxO1 (Ser256) Antibody                                            | Cell Signaling Technology | 9461           | Rabbit     | H M R Mk            | FOXO1 FOXO4         | PI3K / Akt Signaling                    |
| FOXO1 pT24-FOXO3a pT32         | Phospho-FoxO1 (Thr24)/FoxO3a (Thr32) Antibody                              | Cell Signaling Technology | 9464           | Rabbit     | H M R Mk            | FOXO1  FOXO4  FOXO3 | PI3K / Akt Signaling                    |
| FRS2-a pY436                   | Phospho-FRS2-alpha (Tyr436) Antibody                                       | Cell Signaling Technology | 3861           | Rabbit     | H M                 | FRS2                | MAP Kinase Signaling                    |
| Glucocorticoid-R pS211         | Phospho-Glucocorticoid Receptor (Ser211) Antibody                          | Cell Signaling Technology | 4161           | Rabbit     | H M                 | NR3C1               | Nuclear Receptor Signaling              |
| Glutaminase                    | Glutaminase antibody [EP7212]                                              | Abcam                     | ab156876       | Rabbit mAb | H                   | GLS                 | Cytoskeletal Signaling                  |
| GSK3-α/β pS279                 | Phospho-GSK3 beta (Tyr216, Tyr279) Polyclonal Antibody                     | Biosource/Invitrogen      | 44-604G        | Rabbit     | H M R               | GSK3A  GSK3B        | PI3K / Akt Signaling                    |
| GSK3-α/β pS21-9                | Phospho-GSK-3-alpha/beta (Ser21/9) Antibody                                | Cell Signaling Technology | 9331           | Rabbit     | H M R Mk Z          | GSK3A GSK3B         | PI3K / Akt Signaling                    |
| GSK3β pS9                      | Phospho-GSK-3-beta (Ser9) Antibody (disponibile anche come XP® Mono        | Cell Signaling Technology | 9336           | Rabbit     | H M R Mk            | GSK3B               | PI3K / Akt Signaling                    |
| H3-Histone pS10                | Phospho-Histone H3 (Ser10) Antibody (disponibile anche come XP® Mono       | Cell Signaling Technology | 9701           | Rabbit     | H M R Mk Dm Sc      | HIST1H3A            | Chromatin Regulation / Nuclear Function |
| HER2 pY1248                    | ErbB2/Her2 [p Tyr1248] Antibody                                            | Imgenex                   | IMG-90189-1    | Rabbit     | H M R               | ERBB2               | RTK                                     |
| HER3 pY1289                    | Phospho-HER3/ErbB3 (Tyr1289) (21D3) Rabbit mAb                             | Cell Signaling Technology | 4791           | Rabbit mAb | H M                 | ERBB3               | RTK                                     |
| IGF1-R pY1131/Ins-R pY1146     | Phospho-IGF-1 Receptor beta (Tyr1131)/Insulin Receptor beta (Tyr1146) A    | Cell Signaling Technology | 3021           | Rabbit     | H M R               | IGF1R               | Metabolism                              |
| IGF1-R pY1135-6/Ins-R pY1150-1 | Phospho-IGF-1 Receptor β (Tyr1135/1136)/Insulin Receptor β (Tyr1150/11     | Cell Signaling Technology | 3024           | Rabbit mAb | H M R               | IGF1R               | Metabolism                              |
| IRS-1 pS612                    | Phospho-IRS-1 (Ser612) Antibody                                            | Cell Signaling Technology | 2386           | Rabbit     | H M R               | IRS1                | Metabolism                              |
| LKB1 pS334                     | Phospho-LKB1 (Ser334) Antibody                                             | Cell Signaling Technology | 3055           | Rabbit     | H                   | STK11               | Metabolism                              |
| LKB1 pS428                     | Phospho-LKB1 (Ser428) (C67A3) Rabbit mAb                                   | Cell Signaling Technology | 3482           | Rabbit     | H M R Mk            | STK11               | Metabolism                              |
| MDM2 pS166                     | Phospho-MDM2 (Ser166) Antibody                                             | Cell Signaling Technology | 3521           | Rabbit     | H M R               | MDM2                | Cell Cycle / Checkpoint Control         |
| MEK1-2 pS217-21                | Phospho-MEK1/2 (Ser217/221) Antibody                                       | Cell Signaling Technology | 9121           | Rabbit     | H M R Mk Sc         | MAP2K1  MAP2K2      | MAP Kinase Signaling                    |
| MKK4 pS80                      | Phospho-SEK1/MKK4 (Ser80) Antibody                                         | Cell Signaling Technology | 9155           | Rabbit     | H M R               | MAP2K4              | MAP Kinase Signaling                    |
| MSK1 pS360                     | Phospho-MSK1 (Ser360) Antibody                                             | Cell Signaling Technology | 9594           | Rabbit     | H                   | RPS6KA5             | MAP Kinase Signaling                    |

|                      |                                                                         |                           |            |            |                     |                   |                                       |
|----------------------|-------------------------------------------------------------------------|---------------------------|------------|------------|---------------------|-------------------|---------------------------------------|
| mTOR pS2448          | Phospho-mTOR (Ser2448) Antibody (disponibile anche come XP® Monoclonal) | Cell Signaling Technology | 2971       | Rabbit     | H M R Mk            | MTOR              | PI3K / Akt Signaling                  |
| mTOR pS2481          | Phospho-mTOR (Ser2481) Antibody                                         | Cell Signaling Technology | 2974       | Rabbit     | H M R Mk            | MTOR              | PI3K / Akt Signaling                  |
| NDRG1 pT346          | Phospho-NDRG1 (Thr346) (D98G11) XP® Rabbit mAb                          | Cell Signaling Technology | 5482       | Rabbit     | H M R Mk            | NDRG1             | Developmental Biology                 |
| NDRG1 pS330          | Anti-NDRG1 (phospho S330) antibody [EPR5594]                            | Abcam                     | ab124713   | Rabbit mAb | H M R               | NDRG1             | Developmental Biology CTR             |
| p16 INK4A            | p16 INK4A Antibody (DISCONTINUED)                                       | Cell Signaling Technology | 4824       | Rabbit     | NA                  | CDKN2A            | Cell Cycle / Checkpoint Control       |
| p21 Waf1/Cip1        | p21 Waf1/Cip1 (12D1) Rabbit mAb                                         | Cell Signaling Technology | 2947       | Rabbit     | H Mk                | CDKN1A            | Cell Cycle / Checkpoint Control       |
| p27 Kip1             | Purified Mouse Anti-p27[Kip1] Clone 57/Kip1/p27                         | BD                        | 610241     | Mouse      | H M R Dg C Fg       | CDKN1B            | Cell Cycle / Checkpoint Control       |
| p38MAPK pT180-pY182  | Phospho-p38 MAPK (Thr180/Tyr182) Antibody (disponibile anche come XP®)  | Cell Signaling Technology | 9211       | Rabbit     | H M R Mk Dm Pg Sc   | MAPK14            | MAP Kinase Signaling                  |
| p70S6K pT389         | Phospho-p70 S6 Kinase (Thr389) Antibody                                 | Cell Signaling Technology | 9205       | Rabbit     | H M R Mk            | RPS6KB1           | PI3K / Akt Signaling                  |
| p70S6K pS371         | Phospho-p70 S6 Kinase (Ser371) Antibody                                 | Cell Signaling Technology | 9208       | Rabbit     | H M R Mk            | RPS6KB1           | PI3K / Akt Signaling                  |
| p70S6K pT412         | Anti-phospho-p70 S6 Kinase (Thr412) Antibody                            | Upstate/Millipore         | 07-018     | Rabbit     | H M                 | RPS6KB1           | PI3K / Akt Signaling                  |
| p90RSK pS380         | Phospho-p90RSK (Ser380) Antibody                                        | Cell Signaling Technology | 9341       | Rabbit     | H M R Mk            | RPS6KA1           | MAP Kinase Signaling                  |
| PARP cl. D214        | Cleaved PARP (Asp214) Antibody (Human Specific)                         | Cell Signaling Technology | 9541       | Rabbit     | H                   | PARP1             | Apoptosis                             |
| PDGFR-α pY754        | Phospho-PDGFR Receptor alpha (Tyr754) (23B2) Rabbit mAb                 | Cell Signaling Technology | 2992       | Rabbit mAb | H M                 | PDGFRA            | RTK                                   |
| PDGFR-β pY716        | Anti-phospho-PDGFRbeta (Tyr716) antibody                                | Upstate/Millipore         | 07-021     | Rabbit     | H M R               | PDGFRB            | RTK CTR                               |
| PDGFR-β pY751        | Phospho-PDGFR Receptor beta (Tyr751) Antibody                           | Cell Signaling Technology | 3161       | Rabbit     | H M R               | PDGFRB            | RTK                                   |
| PDK1 pS241           | Phospho-PDK1 (Ser241) Antibody                                          | Cell Signaling Technology | 3061       | Rabbit     | H M R               | PDPK1             | PI3K / Akt Signaling                  |
| PLK1 pT210           | Purified Mouse anti-PLK1 (pT210) Clone K50-483                          | BD                        | 558400     | Mouse      | H (M)               | PLK1              | Cell Cycle / Checkpoint Control       |
| PRAS40 pT246         | Phospho-PRAS40 (Thr246) Polyclonal Antibody                             | Biosource/Invitrogen      | 44-1100G   | Rabbit     | H M R               | AKT1S1            | PI3K / Akt Signaling                  |
| ProgR pS190          | Phospho-Progesterone Receptor (Ser190) Antibody                         | Cell Signaling Technology | 3171       | Rabbit     | H                   | PGR               | Nuclear Receptor Signaling            |
| Pyruvate Carboxylase | PCB (D-9)                                                               | Santa Cruz Biotechnology  | sc-365673  | Mouse      | H M R               | PC                | Metabolism                            |
| RanGAP pS428         | Anti-phospho-RanGAP1 (pSer428) antibody                                 | Sigma-Aldrich             | R5280      | Rabbit     | H                   | RANGAP1           | Ubiquitin and Ubiquitin-like proteins |
| S6 pS235-236         | Phospho-S6 Ribosomal Protein (Ser235/236) (2F9)                         | Cell Signaling Technology | 4856       | Rabbit mAb | H M R Mk            | RPS6              | Translational Control                 |
| S6 pS240-244         | Phospho-S6 Ribosomal Protein (Ser240/244)                               | Cell Signaling Technology | 2215       | Rabbit     | H M R Mk Z          | RPS6              | Translational Control                 |
| SAP-JNK pT183-Y185   | Phospho-SAPK/JNK (Thr183/Tyr185) Antibody                               | Cell Signaling Technology | 9251       | Rabbit     | H M R Hm Mk Dm B Sc | MAPK8             | MAP Kinase Signaling                  |
| SGK pS422            | p-SGK (Ser 422)                                                         | Santa Cruz Biotechnology  | sc-16745-R | Rabbit     | H M R               | SGK1              | PI3K / Akt Signaling                  |
| SGK pS78             | SGK (S78) (D36D11)                                                      | Cell Signaling Technology | 5599       | Rabbit mAb | H                   | SGK1              | PI3K / Akt Signaling                  |
| SGK1 pT256           | Phospho-SGK1 (Thr256) Polyclonal Antibody                               | Invitrogen                | 44-1260G   | Rabbit     | H M R               | SGK1              | PI3K / Akt Signaling                  |
| SGK3                 | SGK3 (D18D1)                                                            | Cell Signaling Technology | 8156       | Rabbit     | H M R Mk            | SGK3              | PI3K / Akt Signaling                  |
| SHC pY317            | Anti-phospho-SHC (Tyr317) Antibody                                      | Upstate/Millipore         | 07-206     | Rabbit     | H M                 | SHC1              | MAP Kinase Signaling                  |
| SMAD1-5-8 pS-S-S     | Phospho-Smad1 (Ser463/465)/ Smad5 (Ser463/465)/ Smad8 (Ser426/428)      | Cell Signaling Technology | 9511       | Rabbit     | NA                  | SMAD1 SMAD5 SMAD8 | Developmental Biology CTR             |
| SMAD2 pS465-67       | Phospho-Smad2 (Ser465/467) Antibody                                     | Cell Signaling Technology | 3101       | Rabbit     | NA                  | SMAD2             | Developmental Biology                 |
| SRC Family pY416     | Phospho-Src Family (Tyr416) Antibody                                    | Cell Signaling Technology | 2101       | Rabbit     | H M R               | SRC               | MAP Kinase Signaling                  |
| SRC pY527            | Phospho-Src (Tyr527) Antibody                                           | Cell Signaling Technology | 2105       | Rabbit     | H M R               | SRC               | MAP Kinase Signaling                  |
| STAT1 pY701          | Phospho-Stat1 (Tyr701) Antibody                                         | Cell Signaling Technology | 9171       | Rabbit     | NA                  | STAT1             | Immunology and Inflammation           |
| STAT3 pS727          | Phospho-Stat3 (Ser727) Antibody                                         | Cell Signaling Technology | 9134       | Rabbit     | H M R               | STAT3             | Immunology and Inflammation           |
| STAT3 pY705          | Phospho-Stat3 (Tyr705) (D3A7) XP® Rabbit mAb                            | Cell Signaling Technology | 9145S      | Rabbit mAb | H M R Mk            | STAT3             | Immunology and Inflammation           |
| STAT5 pY694          | Phospho-Stat5 (Tyr694) Antibody                                         | Cell Signaling Technology | 9351       | Rabbit     | H M                 | STAT5             | Immunology and Inflammation           |
| TGF-beta             | TGF-beta (56E4) Rabbit mAb                                              | Cell Signaling Technology | 3709       | Rabbit     | H                   | TGFB1 TGFB3       | Developmental Biology                 |
| Tuberin pY1571       | Phospho-Tuberin/TSC2 (Tyr1571) Antibody                                 | Cell Signaling Technology | 3614       | Rabbit     | M Mk                | TSC2              | PI3K / Akt Signaling                  |
| VEGFR2 pY1175        | Phospho-VEGF Receptor 2 (Tyr1175) (19A10) Rabbit mAb                    | Cell Signaling Technology | 2478       | Rabbit mAb | H M                 | KDR               | RTK                                   |
| VEGFR2 pY951         | Phospho-VEGF Receptor 2 (Tyr951) Antibody                               | Cell Signaling Technology | 2471       | Rabbit     | H M                 | KDR               | RTK                                   |
| VEGFR2 pY996         | Phospho-VEGF Receptor 2 (Tyr996) Antibody                               | Cell Signaling Technology | 2474       | Rabbit     | H M                 | KDR               | RTK                                   |
| Vimentin             | Vimentin (D21H3) XP® Rabbit mAb                                         | Cell Signaling Technology | 5741       | Rabbit     | H M R Mk            | VIM               | Cytoskeletal Signaling                |
| WNT5a-b              | Wnt5a/B (C27E8)                                                         | Cell Signaling Technology | 2530       | Rabbit mAb | H                   | WNT5A WNT5B       | Developmental Biology                 |
