# Supplementary material for: The kinase inhibitor SI113 induces autophagy and synergizes with quinacrine in hindering the growth of human glioblastoma multiforme cells
Source: Springer Nature journal article supplement (doi:10.1186/s13046-019-1212-1), 2019-05-17
Supplement: MOESM2 [file 16732056]

**Figure S1**

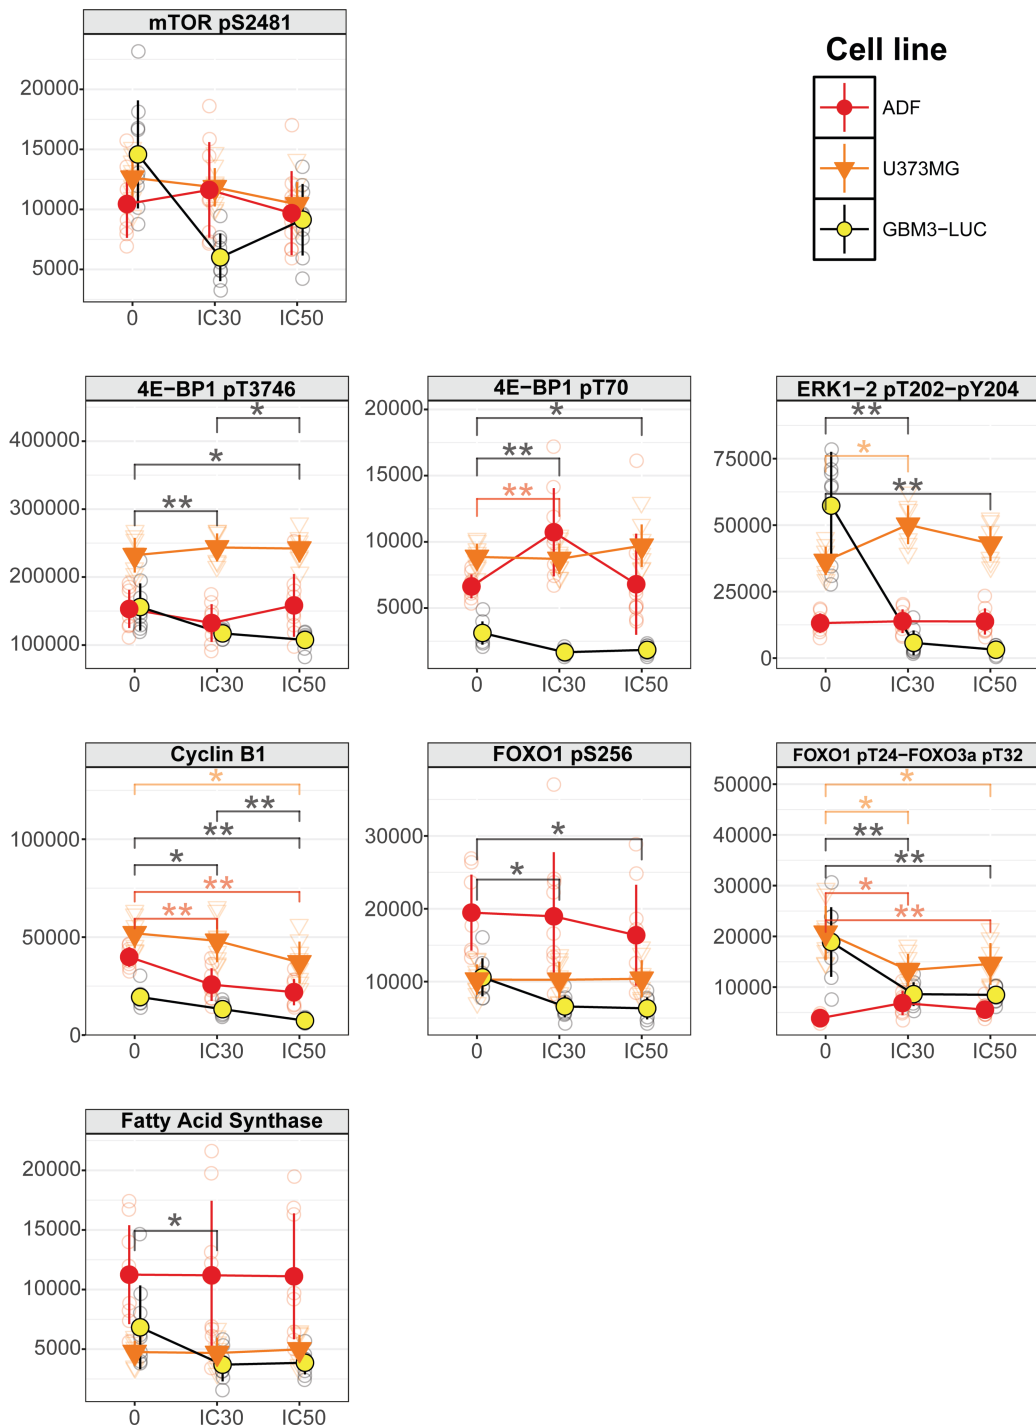

**Figure S1. Additional RPPA endpoints.** ADF, U373MG and GBM3-Luc cells were incubated with SI113 at the IC30 and IC50 concentrations specific for each cell line and then processed for RPPA analysis. When significant, statistical comparisons (Wilcoxon signed-rank test, FDR-adjusted p values) are reported on each individual plot. Statistical significance coding is described in the Materials and Methods section of the manuscript. RPPA plots refer to results obtained after 2 h (ERK1-2 pT202-pY204) or 8 h (mTOR pS2481, FOXO1 pS256, FOXO1 pT24-FOXO3a pT32 and Fatty Acid Synthase) of exposure to SI113.
