# Supplementary material for: The kinase inhibitor SI113 induces autophagy and synergizes with quinacrine in hindering the growth of human glioblastoma multiforme cells
Source: Springer Nature journal article supplement (doi:10.1186/s13046-019-1212-1), 2019-05-17
Supplement: MOESM4 [file 16732056]

## Figure S2

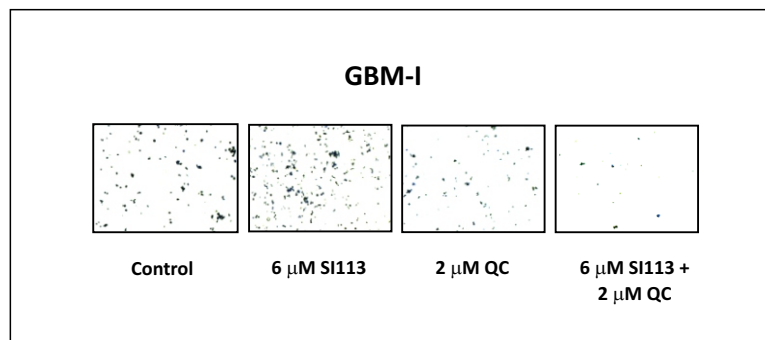

**Figure S2. Clonogenic Assay.** GBM-I cells were exposed to solvent(s) (Control), 6  $\mu$ M SI113, 2  $\mu$ M QC or their association for 48 h and then allowed to grow and form colonies for the subsequent 26 d. Then cells were all pelleted, fixed in 2% PFA, stained with 2% crystal violet, cytocentrifuged on a slide and
