# Supplementary material for: The kinase inhibitor SI113 induces autophagy and synergizes with quinacrine in hindering the growth of human glioblastoma multiforme cells
Source: J Exp Clin Cancer Res. 2019 May 17;38:202. doi: 10.1186/s13046-019-1212-1 (PMC6525441; doi:10.1186/s13046-019-1212-1)
Supplement: Supplementary file 3 — Table S2. Raw RPPA data. (XLSX 126 kb) [file 13046_2019_1212_MOESM3_ESM.xlsx]

## Sheet: Sheet 1
Sample.Code	Treatment	Concentration	Time	CellLine	Antibody	Normalized_intensity
HIGH_CTRL_0_2h	CTRL	0	2h	ADF	4E-BP1 pT3746	158465
HIGH_CTRL_0_2h	CTRL	0	2h	ADF	4E-BP1 pT3746	156494
HIGH_CTRL_0_2h	CTRL	0	2h	ADF	4E-BP1 pT3746	144222
HIGH_CTRL_0_8h	CTRL	0	8h	ADF	4E-BP1 pT3746	158465
HIGH_CTRL_0_8h	CTRL	0	8h	ADF	4E-BP1 pT3746	156494
HIGH_CTRL_0_8h	CTRL	0	8h	ADF	4E-BP1 pT3746	144222
HIGH_CTRL_0_2h	CTRL	0	2h	ADF	Ac-CoA Carboxylase pS79	29279.7
HIGH_CTRL_0_2h	CTRL	0	2h	ADF	Ac-CoA Carboxylase pS79	32684
HIGH_CTRL_0_2h	CTRL	0	2h	ADF	Ac-CoA Carboxylase pS79	31360
HIGH_CTRL_0_8h	CTRL	0	8h	ADF	Ac-CoA Carboxylase pS79	29279.7
HIGH_CTRL_0_8h	CTRL	0	8h	ADF	Ac-CoA Carboxylase pS79	32684
HIGH_CTRL_0_8h	CTRL	0	8h	ADF	Ac-CoA Carboxylase pS79	31360
HIGH_CTRL_0_2h	CTRL	0	2h	ADF	AKT pS473	2340.67
HIGH_CTRL_0_2h	CTRL	0	2h	ADF	AKT pS473	2413.67
HIGH_CTRL_0_2h	CTRL	0	2h	ADF	AKT pS473	2071.33
HIGH_CTRL_0_8h	CTRL	0	8h	ADF	AKT pS473	2340.67
HIGH_CTRL_0_8h	CTRL	0	8h	ADF	AKT pS473	2413.67
HIGH_CTRL_0_8h	CTRL	0	8h	ADF	AKT pS473	2071.33
HIGH_CTRL_0_2h	CTRL	0	2h	ADF	AKT pT308	2998.67
HIGH_CTRL_0_2h	CTRL	0	2h	ADF	AKT pT308	3323
HIGH_CTRL_0_2h	CTRL	0	2h	ADF	AKT pT308	3185.33
HIGH_CTRL_0_8h	CTRL	0	8h	ADF	AKT pT308	2998.67
HIGH_CTRL_0_8h	CTRL	0	8h	ADF	AKT pT308	3323
HIGH_CTRL_0_8h	CTRL	0	8h	ADF	AKT pT308	3185.33
HIGH_CTRL_0_2h	CTRL	0	2h	ADF	ALDH	12.15
HIGH_CTRL_0_2h	CTRL	0	2h	ADF	ALDH	59.2
HIGH_CTRL_0_2h	CTRL	0	2h	ADF	ALDH	25.8
HIGH_CTRL_0_8h	CTRL	0	8h	ADF	ALDH	12.15
HIGH_CTRL_0_8h	CTRL	0	8h	ADF	ALDH	59.2
HIGH_CTRL_0_8h	CTRL	0	8h	ADF	ALDH	25.8
HIGH_CTRL_0_2h	CTRL	0	2h	ADF	ALK	3015.67
HIGH_CTRL_0_2h	CTRL	0	2h	ADF	ALK	4080.33
HIGH_CTRL_0_2h	CTRL	0	2h	ADF	ALK	9398
HIGH_CTRL_0_8h	CTRL	0	8h	ADF	ALK	3015.67
HIGH_CTRL_0_8h	CTRL	0	8h	ADF	ALK	4080.33
HIGH_CTRL_0_8h	CTRL	0	8h	ADF	ALK	9398
HIGH_CTRL_0_2h	CTRL	0	2h	ADF	AMPKa pS485	10050.3
HIGH_CTRL_0_2h	CTRL	0	2h	ADF	AMPKa pS485	10238
HIGH_CTRL_0_2h	CTRL	0	2h	ADF	AMPKa pS485	10587.3
HIGH_CTRL_0_8h	CTRL	0	8h	ADF	AMPKa pS485	10050.3
HIGH_CTRL_0_8h	CTRL	0	8h	ADF	AMPKa pS485	10238
HIGH_CTRL_0_8h	CTRL	0	8h	ADF	AMPKa pS485	10587.3
HIGH_CTRL_0_2h	CTRL	0	2h	ADF	AMPKa pT172	4447.67
HIGH_CTRL_0_2h	CTRL	0	2h	ADF	AMPKa pT172	5022.33
HIGH_CTRL_0_2h	CTRL	0	2h	ADF	AMPKa pT172	6079.67
HIGH_CTRL_0_8h	CTRL	0	8h	ADF	AMPKa pT172	4447.67
HIGH_CTRL_0_8h	CTRL	0	8h	ADF	AMPKa pT172	5022.33
HIGH_CTRL_0_8h	CTRL	0	8h	ADF	AMPKa pT172	6079.67
HIGH_CTRL_0_2h	CTRL	0	2h	ADF	AMPKb pS108	8388
HIGH_CTRL_0_2h	CTRL	0	2h	ADF	AMPKb pS108	7472.67
HIGH_CTRL_0_2h	CTRL	0	2h	ADF	AMPKb pS108	7435
HIGH_CTRL_0_8h	CTRL	0	8h	ADF	AMPKb pS108	8388
HIGH_CTRL_0_8h	CTRL	0	8h	ADF	AMPKb pS108	7472.67
HIGH_CTRL_0_8h	CTRL	0	8h	ADF	AMPKb pS108	7435
HIGH_CTRL_0_2h	CTRL	0	2h	ADF	AndrRec	2309.33
HIGH_CTRL_0_2h	CTRL	0	2h	ADF	AndrRec	2455
HIGH_CTRL_0_2h	CTRL	0	2h	ADF	AndrRec	2694.67
HIGH_CTRL_0_8h	CTRL	0	8h	ADF	AndrRec	2309.33
HIGH_CTRL_0_8h	CTRL	0	8h	ADF	AndrRec	2455
HIGH_CTRL_0_8h	CTRL	0	8h	ADF	AndrRec	2694.67
HIGH_CTRL_0_2h	CTRL	0	2h	ADF	ASK1 pS83	1587.33
HIGH_CTRL_0_2h	CTRL	0	2h	ADF	ASK1 pS83	1714.33
HIGH_CTRL_0_2h	CTRL	0	2h	ADF	ASK1 pS83	1730.67
HIGH_CTRL_0_8h	CTRL	0	8h	ADF	ASK1 pS83	1587.33
HIGH_CTRL_0_8h	CTRL	0	8h	ADF	ASK1 pS83	1714.33
HIGH_CTRL_0_8h	CTRL	0	8h	ADF	ASK1 pS83	1730.67
HIGH_CTRL_0_2h	CTRL	0	2h	ADF	ATP-Citrate Lyase pS454	25541.3
HIGH_CTRL_0_2h	CTRL	0	2h	ADF	ATP-Citrate Lyase pS454	38891
HIGH_CTRL_0_2h	CTRL	0	2h	ADF	ATP-Citrate Lyase pS454	46318
HIGH_CTRL_0_8h	CTRL	0	8h	ADF	ATP-Citrate Lyase pS454	25541.3
HIGH_CTRL_0_8h	CTRL	0	8h	ADF	ATP-Citrate Lyase pS454	38891
HIGH_CTRL_0_8h	CTRL	0	8h	ADF	ATP-Citrate Lyase pS454	46318
HIGH_CTRL_0_2h	CTRL	0	2h	ADF	BAD pS112	10166
HIGH_CTRL_0_2h	CTRL	0	2h	ADF	BAD pS112	10306.7
HIGH_CTRL_0_2h	CTRL	0	2h	ADF	BAD pS112	9331
HIGH_CTRL_0_8h	CTRL	0	8h	ADF	BAD pS112	10166
HIGH_CTRL_0_8h	CTRL	0	8h	ADF	BAD pS112	10306.7
HIGH_CTRL_0_8h	CTRL	0	8h	ADF	BAD pS112	9331
HIGH_CTRL_0_2h	CTRL	0	2h	ADF	BAD pS155	23968.7
HIGH_CTRL_0_2h	CTRL	0	2h	ADF	BAD pS155	21770.3
HIGH_CTRL_0_2h	CTRL	0	2h	ADF	BAD pS155	20689.7
HIGH_CTRL_0_8h	CTRL	0	8h	ADF	BAD pS155	23968.7
HIGH_CTRL_0_8h	CTRL	0	8h	ADF	BAD pS155	21770.3
HIGH_CTRL_0_8h	CTRL	0	8h	ADF	BAD pS155	20689.7
HIGH_CTRL_0_2h	CTRL	0	2h	ADF	b-Catenin pT41/pS45	11630
HIGH_CTRL_0_2h	CTRL	0	2h	ADF	b-Catenin pT41/pS45	13755.3
HIGH_CTRL_0_2h	CTRL	0	2h	ADF	b-Catenin pT41/pS45	14382
HIGH_CTRL_0_8h	CTRL	0	8h	ADF	b-Catenin pT41/pS45	11630
HIGH_CTRL_0_8h	CTRL	0	8h	ADF	b-Catenin pT41/pS45	13755.3
HIGH_CTRL_0_8h	CTRL	0	8h	ADF	b-Catenin pT41/pS45	14382
HIGH_CTRL_0_2h	CTRL	0	2h	ADF	c-ABL pT735	12090.3
HIGH_CTRL_0_2h	CTRL	0	2h	ADF	c-ABL pT735	11589.3
HIGH_CTRL_0_2h	CTRL	0	2h	ADF	c-ABL pT735	12450
HIGH_CTRL_0_8h	CTRL	0	8h	ADF	c-ABL pT735	12090.3
HIGH_CTRL_0_8h	CTRL	0	8h	ADF	c-ABL pT735	11589.3
HIGH_CTRL_0_8h	CTRL	0	8h	ADF	c-ABL pT735	12450
HIGH_CTRL_0_2h	CTRL	0	2h	ADF	c-ABL pY245	176.333
HIGH_CTRL_0_2h	CTRL	0	2h	ADF	c-ABL pY245	318.667
HIGH_CTRL_0_2h	CTRL	0	2h	ADF	c-ABL pY245	487.667
HIGH_CTRL_0_8h	CTRL	0	8h	ADF	c-ABL pY245	176.333
HIGH_CTRL_0_8h	CTRL	0	8h	ADF	c-ABL pY245	318.667
HIGH_CTRL_0_8h	CTRL	0	8h	ADF	c-ABL pY245	487.667
HIGH_CTRL_0_2h	CTRL	0	2h	ADF	c-Myc pS62	6045.33
HIGH_CTRL_0_2h	CTRL	0	2h	ADF	c-Myc pS62	5486.67
HIGH_CTRL_0_2h	CTRL	0	2h	ADF	c-Myc pS62	5791.67
HIGH_CTRL_0_8h	CTRL	0	8h	ADF	c-Myc pS62	6045.33
HIGH_CTRL_0_8h	CTRL	0	8h	ADF	c-Myc pS62	5486.67
HIGH_CTRL_0_8h	CTRL	0	8h	ADF	c-Myc pS62	5791.67
HIGH_CTRL_0_2h	CTRL	0	2h	ADF	Cyclin B1	38082
HIGH_CTRL_0_2h	CTRL	0	2h	ADF	Cyclin B1	40436.3
HIGH_CTRL_0_2h	CTRL	0	2h	ADF	Cyclin B1	41142.7
HIGH_CTRL_0_8h	CTRL	0	8h	ADF	Cyclin B1	38082
HIGH_CTRL_0_8h	CTRL	0	8h	ADF	Cyclin B1	40436.3
HIGH_CTRL_0_8h	CTRL	0	8h	ADF	Cyclin B1	41142.7
HIGH_CTRL_0_2h	CTRL	0	2h	ADF	Cyclin D1	25870
HIGH_CTRL_0_2h	CTRL	0	2h	ADF	Cyclin D1	30358.3
HIGH_CTRL_0_2h	CTRL	0	2h	ADF	Cyclin D1	33878.3
HIGH_CTRL_0_8h	CTRL	0	8h	ADF	Cyclin D1	25870
HIGH_CTRL_0_8h	CTRL	0	8h	ADF	Cyclin D1	30358.3
HIGH_CTRL_0_8h	CTRL	0	8h	ADF	Cyclin D1	33878.3
HIGH_CTRL_0_2h	CTRL	0	2h	ADF	EGFR pY1173	9926
HIGH_CTRL_0_2h	CTRL	0	2h	ADF	EGFR pY1173	10049.3
HIGH_CTRL_0_2h	CTRL	0	2h	ADF	EGFR pY1173	9491
HIGH_CTRL_0_8h	CTRL	0	8h	ADF	EGFR pY1173	9926
HIGH_CTRL_0_8h	CTRL	0	8h	ADF	EGFR pY1173	10049.3
HIGH_CTRL_0_8h	CTRL	0	8h	ADF	EGFR pY1173	9491
HIGH_CTRL_0_2h	CTRL	0	2h	ADF	EGFR pY845 MILK	167.933
HIGH_CTRL_0_2h	CTRL	0	2h	ADF	EGFR pY845 MILK	108.1
HIGH_CTRL_0_2h	CTRL	0	2h	ADF	EGFR pY845 MILK	56.65
HIGH_CTRL_0_8h	CTRL	0	8h	ADF	EGFR pY845 MILK	167.933
HIGH_CTRL_0_8h	CTRL	0	8h	ADF	EGFR pY845 MILK	108.1
HIGH_CTRL_0_8h	CTRL	0	8h	ADF	EGFR pY845 MILK	56.65
HIGH_CTRL_0_2h	CTRL	0	2h	ADF	ERG	32503.3
HIGH_CTRL_0_2h	CTRL	0	2h	ADF	ERG	34806.7
HIGH_CTRL_0_2h	CTRL	0	2h	ADF	ERG	37873
HIGH_CTRL_0_8h	CTRL	0	8h	ADF	ERG	32503.3
HIGH_CTRL_0_8h	CTRL	0	8h	ADF	ERG	34806.7
HIGH_CTRL_0_8h	CTRL	0	8h	ADF	ERG	37873
HIGH_CTRL_0_2h	CTRL	0	2h	ADF	Fatty Acid Synthase	9484.67
HIGH_CTRL_0_2h	CTRL	0	2h	ADF	Fatty Acid Synthase	11731
HIGH_CTRL_0_2h	CTRL	0	2h	ADF	Fatty Acid Synthase	12535.7
HIGH_CTRL_0_8h	CTRL	0	8h	ADF	Fatty Acid Synthase	9484.67
HIGH_CTRL_0_8h	CTRL	0	8h	ADF	Fatty Acid Synthase	11731
HIGH_CTRL_0_8h	CTRL	0	8h	ADF	Fatty Acid Synthase	12535.7
HIGH_CTRL_0_2h	CTRL	0	2h	ADF	Fodrin-a cl. D1185	11620.3
HIGH_CTRL_0_2h	CTRL	0	2h	ADF	Fodrin-a cl. D1185	11474.7
HIGH_CTRL_0_2h	CTRL	0	2h	ADF	Fodrin-a cl. D1185	10503.3
HIGH_CTRL_0_8h	CTRL	0	8h	ADF	Fodrin-a cl. D1185	11620.3
HIGH_CTRL_0_8h	CTRL	0	8h	ADF	Fodrin-a cl. D1185	11474.7
HIGH_CTRL_0_8h	CTRL	0	8h	ADF	Fodrin-a cl. D1185	10503.3
HIGH_CTRL_0_2h	CTRL	0	2h	ADF	FOXO1 pT24-FOXO3a pT32	3790.67
HIGH_CTRL_0_2h	CTRL	0	2h	ADF	FOXO1 pT24-FOXO3a pT32	3387.67
HIGH_CTRL_0_2h	CTRL	0	2h	ADF	FOXO1 pT24-FOXO3a pT32	4452.67
HIGH_CTRL_0_8h	CTRL	0	8h	ADF	FOXO1 pT24-FOXO3a pT32	3790.67
HIGH_CTRL_0_8h	CTRL	0	8h	ADF	FOXO1 pT24-FOXO3a pT32	3387.67
HIGH_CTRL_0_8h	CTRL	0	8h	ADF	FOXO1 pT24-FOXO3a pT32	4452.67
HIGH_CTRL_0_2h	CTRL	0	2h	ADF	GSK3ab pS21-9	15028.7
HIGH_CTRL_0_2h	CTRL	0	2h	ADF	GSK3ab pS21-9	16406
HIGH_CTRL_0_2h	CTRL	0	2h	ADF	GSK3ab pS21-9	17671
HIGH_CTRL_0_8h	CTRL	0	8h	ADF	GSK3ab pS21-9	15028.7
HIGH_CTRL_0_8h	CTRL	0	8h	ADF	GSK3ab pS21-9	16406
HIGH_CTRL_0_8h	CTRL	0	8h	ADF	GSK3ab pS21-9	17671
HIGH_CTRL_0_2h	CTRL	0	2h	ADF	GSK3-a/b pS279	48274
HIGH_CTRL_0_2h	CTRL	0	2h	ADF	GSK3-a/b pS279	46318
HIGH_CTRL_0_2h	CTRL	0	2h	ADF	GSK3-a/b pS279	44338.3
HIGH_CTRL_0_8h	CTRL	0	8h	ADF	GSK3-a/b pS279	48274
HIGH_CTRL_0_8h	CTRL	0	8h	ADF	GSK3-a/b pS279	46318
HIGH_CTRL_0_8h	CTRL	0	8h	ADF	GSK3-a/b pS279	44338.3
HIGH_CTRL_0_2h	CTRL	0	2h	ADF	GSK3b pS9	18423.3
HIGH_CTRL_0_2h	CTRL	0	2h	ADF	GSK3b pS9	22018.7
HIGH_CTRL_0_2h	CTRL	0	2h	ADF	GSK3b pS9	26158
HIGH_CTRL_0_8h	CTRL	0	8h	ADF	GSK3b pS9	18423.3
HIGH_CTRL_0_8h	CTRL	0	8h	ADF	GSK3b pS9	22018.7
HIGH_CTRL_0_8h	CTRL	0	8h	ADF	GSK3b pS9	26158
HIGH_CTRL_0_2h	CTRL	0	2h	ADF	H3-Histone pS10	21337.3
HIGH_CTRL_0_2h	CTRL	0	2h	ADF	H3-Histone pS10	18004.3
HIGH_CTRL_0_2h	CTRL	0	2h	ADF	H3-Histone pS10	18969
HIGH_CTRL_0_8h	CTRL	0	8h	ADF	H3-Histone pS10	21337.3
HIGH_CTRL_0_8h	CTRL	0	8h	ADF	H3-Histone pS10	18004.3
HIGH_CTRL_0_8h	CTRL	0	8h	ADF	H3-Histone pS10	18969
HIGH_CTRL_0_2h	CTRL	0	2h	ADF	IRS-1 pS612	2629.33
HIGH_CTRL_0_2h	CTRL	0	2h	ADF	IRS-1 pS612	3648
HIGH_CTRL_0_2h	CTRL	0	2h	ADF	IRS-1 pS612	4043.67
HIGH_CTRL_0_8h	CTRL	0	8h	ADF	IRS-1 pS612	2629.33
HIGH_CTRL_0_8h	CTRL	0	8h	ADF	IRS-1 pS612	3648
HIGH_CTRL_0_8h	CTRL	0	8h	ADF	IRS-1 pS612	4043.67
HIGH_CTRL_0_2h	CTRL	0	2h	ADF	p27_Kip1	3076.67
HIGH_CTRL_0_2h	CTRL	0	2h	ADF	p27_Kip1	3667
HIGH_CTRL_0_2h	CTRL	0	2h	ADF	p27_Kip1	3185.33
HIGH_CTRL_0_8h	CTRL	0	8h	ADF	p27_Kip1	3076.67
HIGH_CTRL_0_8h	CTRL	0	8h	ADF	p27_Kip1	3667
HIGH_CTRL_0_8h	CTRL	0	8h	ADF	p27_Kip1	3185.33
HIGH_CTRL_0_2h	CTRL	0	2h	ADF	LKB1 pS334	41912.3
HIGH_CTRL_0_2h	CTRL	0	2h	ADF	LKB1 pS334	52619
HIGH_CTRL_0_2h	CTRL	0	2h	ADF	LKB1 pS334	52114.7
HIGH_CTRL_0_8h	CTRL	0	8h	ADF	LKB1 pS334	41912.3
HIGH_CTRL_0_8h	CTRL	0	8h	ADF	LKB1 pS334	52619
HIGH_CTRL_0_8h	CTRL	0	8h	ADF	LKB1 pS334	52114.7
HIGH_CTRL_0_2h	CTRL	0	2h	ADF	MDM2 pS166	5952.33
HIGH_CTRL_0_2h	CTRL	0	2h	ADF	MDM2 pS166	5575.67
HIGH_CTRL_0_2h	CTRL	0	2h	ADF	MDM2 pS166	5114.67
HIGH_CTRL_0_8h	CTRL	0	8h	ADF	MDM2 pS166	5952.33
HIGH_CTRL_0_8h	CTRL	0	8h	ADF	MDM2 pS166	5575.67
HIGH_CTRL_0_8h	CTRL	0	8h	ADF	MDM2 pS166	5114.67
HIGH_CTRL_0_2h	CTRL	0	2h	ADF	MEK1-2 pS217-21	85609.7
HIGH_CTRL_0_2h	CTRL	0	2h	ADF	MEK1-2 pS217-21	92108.7
HIGH_CTRL_0_2h	CTRL	0	2h	ADF	MEK1-2 pS217-21	107452
HIGH_CTRL_0_8h	CTRL	0	8h	ADF	MEK1-2 pS217-21	85609.7
HIGH_CTRL_0_8h	CTRL	0	8h	ADF	MEK1-2 pS217-21	92108.7
HIGH_CTRL_0_8h	CTRL	0	8h	ADF	MEK1-2 pS217-21	107452
HIGH_CTRL_0_2h	CTRL	0	2h	ADF	MKK4 pS80	5351.67
HIGH_CTRL_0_2h	CTRL	0	2h	ADF	MKK4 pS80	5989
HIGH_CTRL_0_2h	CTRL	0	2h	ADF	MKK4 pS80	6541.33
HIGH_CTRL_0_8h	CTRL	0	8h	ADF	MKK4 pS80	5351.67
HIGH_CTRL_0_8h	CTRL	0	8h	ADF	MKK4 pS80	5989
HIGH_CTRL_0_8h	CTRL	0	8h	ADF	MKK4 pS80	6541.33
HIGH_CTRL_0_2h	CTRL	0	2h	ADF	MSK1 pS360	4793.33
HIGH_CTRL_0_2h	CTRL	0	2h	ADF	MSK1 pS360	5226.67
HIGH_CTRL_0_2h	CTRL	0	2h	ADF	MSK1 pS360	6083
HIGH_CTRL_0_8h	CTRL	0	8h	ADF	MSK1 pS360	4793.33
HIGH_CTRL_0_8h	CTRL	0	8h	ADF	MSK1 pS360	5226.67
HIGH_CTRL_0_8h	CTRL	0	8h	ADF	MSK1 pS360	6083
HIGH_CTRL_0_2h	CTRL	0	2h	ADF	mTOR pS2448	23693.7
HIGH_CTRL_0_2h	CTRL	0	2h	ADF	mTOR pS2448	22061
HIGH_CTRL_0_2h	CTRL	0	2h	ADF	mTOR pS2448	20122.3
HIGH_CTRL_0_8h	CTRL	0	8h	ADF	mTOR pS2448	23693.7
HIGH_CTRL_0_8h	CTRL	0	8h	ADF	mTOR pS2448	22061
HIGH_CTRL_0_8h	CTRL	0	8h	ADF	mTOR pS2448	20122.3
HIGH_CTRL_0_2h	CTRL	0	2h	ADF	mTOR pS2481	8514.67
HIGH_CTRL_0_2h	CTRL	0	2h	ADF	mTOR pS2481	9185.33
HIGH_CTRL_0_2h	CTRL	0	2h	ADF	mTOR pS2481	13648.7
HIGH_CTRL_0_8h	CTRL	0	8h	ADF	mTOR pS2481	8514.67
HIGH_CTRL_0_8h	CTRL	0	8h	ADF	mTOR pS2481	9185.33
HIGH_CTRL_0_8h	CTRL	0	8h	ADF	mTOR pS2481	13648.7
HIGH_CTRL_0_2h	CTRL	0	2h	ADF	NDRG1 pT346	36283
HIGH_CTRL_0_2h	CTRL	0	2h	ADF	NDRG1 pT346	38027.3
HIGH_CTRL_0_2h	CTRL	0	2h	ADF	NDRG1 pT346	39866.3
HIGH_CTRL_0_8h	CTRL	0	8h	ADF	NDRG1 pT346	36283
HIGH_CTRL_0_8h	CTRL	0	8h	ADF	NDRG1 pT346	38027.3
HIGH_CTRL_0_8h	CTRL	0	8h	ADF	NDRG1 pT346	39866.3
HIGH_CTRL_0_2h	CTRL	0	2h	ADF	NDRG1_pS330	24784
HIGH_CTRL_0_2h	CTRL	0	2h	ADF	NDRG1_pS330	26568.3
HIGH_CTRL_0_2h	CTRL	0	2h	ADF	NDRG1_pS330	25047
HIGH_CTRL_0_8h	CTRL	0	8h	ADF	NDRG1_pS330	24784
HIGH_CTRL_0_8h	CTRL	0	8h	ADF	NDRG1_pS330	26568.3
HIGH_CTRL_0_8h	CTRL	0	8h	ADF	NDRG1_pS330	25047
HIGH_CTRL_0_2h	CTRL	0	2h	ADF	NDRG1_pS330	20595.3
HIGH_CTRL_0_2h	CTRL	0	2h	ADF	NDRG1_pS330	22211
HIGH_CTRL_0_2h	CTRL	0	2h	ADF	NDRG1_pS330	20447.7
HIGH_CTRL_0_8h	CTRL	0	8h	ADF	NDRG1_pS330	20595.3
HIGH_CTRL_0_8h	CTRL	0	8h	ADF	NDRG1_pS330	22211
HIGH_CTRL_0_8h	CTRL	0	8h	ADF	NDRG1_pS330	20447.7
HIGH_CTRL_0_2h	CTRL	0	2h	ADF	p16_INK4A	1844
HIGH_CTRL_0_2h	CTRL	0	2h	ADF	p16_INK4A	2119.33
HIGH_CTRL_0_2h	CTRL	0	2h	ADF	p16_INK4A	4176.67
HIGH_CTRL_0_8h	CTRL	0	8h	ADF	p16_INK4A	1844
HIGH_CTRL_0_8h	CTRL	0	8h	ADF	p16_INK4A	2119.33
HIGH_CTRL_0_8h	CTRL	0	8h	ADF	p16_INK4A	4176.67
HIGH_CTRL_0_2h	CTRL	0	2h	ADF	p21_Waf1/Cip1	641.667
HIGH_CTRL_0_2h	CTRL	0	2h	ADF	p21_Waf1/Cip1	630.667
HIGH_CTRL_0_2h	CTRL	0	2h	ADF	p21_Waf1/Cip1	677.333
HIGH_CTRL_0_8h	CTRL	0	8h	ADF	p21_Waf1/Cip1	641.667
HIGH_CTRL_0_8h	CTRL	0	8h	ADF	p21_Waf1/Cip1	630.667
HIGH_CTRL_0_8h	CTRL	0	8h	ADF	p21_Waf1/Cip1	677.333
HIGH_CTRL_0_2h	CTRL	0	2h	ADF	p70S6K pS371	6979
HIGH_CTRL_0_2h	CTRL	0	2h	ADF	p70S6K pS371	7658
HIGH_CTRL_0_2h	CTRL	0	2h	ADF	p70S6K pS371	7766.33
HIGH_CTRL_0_8h	CTRL	0	8h	ADF	p70S6K pS371	6979
HIGH_CTRL_0_8h	CTRL	0	8h	ADF	p70S6K pS371	7658
HIGH_CTRL_0_8h	CTRL	0	8h	ADF	p70S6K pS371	7766.33
HIGH_CTRL_0_2h	CTRL	0	2h	ADF	p90RSK pS380	5766
HIGH_CTRL_0_2h	CTRL	0	2h	ADF	p90RSK pS380	7287.33
HIGH_CTRL_0_2h	CTRL	0	2h	ADF	p90RSK pS380	7014.67
HIGH_CTRL_0_8h	CTRL	0	8h	ADF	p90RSK pS380	5766
HIGH_CTRL_0_8h	CTRL	0	8h	ADF	p90RSK pS380	7287.33
HIGH_CTRL_0_8h	CTRL	0	8h	ADF	p90RSK pS380	7014.67
HIGH_CTRL_0_2h	CTRL	0	2h	ADF	PARP D214	1457
HIGH_CTRL_0_2h	CTRL	0	2h	ADF	PARP D214	1622
HIGH_CTRL_0_2h	CTRL	0	2h	ADF	PARP D214	1742.67
HIGH_CTRL_0_8h	CTRL	0	8h	ADF	PARP D214	1457
HIGH_CTRL_0_8h	CTRL	0	8h	ADF	PARP D214	1622
HIGH_CTRL_0_8h	CTRL	0	8h	ADF	PARP D214	1742.67
HIGH_CTRL_0_2h	CTRL	0	2h	ADF	PDGFR-b pY751	4095.67
HIGH_CTRL_0_2h	CTRL	0	2h	ADF	PDGFR-b pY751	3662.33
HIGH_CTRL_0_2h	CTRL	0	2h	ADF	PDGFR-b pY751	3683
HIGH_CTRL_0_8h	CTRL	0	8h	ADF	PDGFR-b pY751	4095.67
HIGH_CTRL_0_8h	CTRL	0	8h	ADF	PDGFR-b pY751	3662.33
HIGH_CTRL_0_8h	CTRL	0	8h	ADF	PDGFR-b pY751	3683
HIGH_CTRL_0_2h	CTRL	0	2h	ADF	PRAS40 pT246	13094
HIGH_CTRL_0_2h	CTRL	0	2h	ADF	PRAS40 pT246	13650
HIGH_CTRL_0_2h	CTRL	0	2h	ADF	PRAS40 pT246	14359.7
HIGH_CTRL_0_8h	CTRL	0	8h	ADF	PRAS40 pT246	13094
HIGH_CTRL_0_8h	CTRL	0	8h	ADF	PRAS40 pT246	13650
HIGH_CTRL_0_8h	CTRL	0	8h	ADF	PRAS40 pT246	14359.7
HIGH_CTRL_0_2h	CTRL	0	2h	ADF	ProgR pS190	944
HIGH_CTRL_0_2h	CTRL	0	2h	ADF	ProgR pS190	1043.67
HIGH_CTRL_0_2h	CTRL	0	2h	ADF	ProgR pS190	1082.33
HIGH_CTRL_0_8h	CTRL	0	8h	ADF	ProgR pS190	944
HIGH_CTRL_0_8h	CTRL	0	8h	ADF	ProgR pS190	1043.67
HIGH_CTRL_0_8h	CTRL	0	8h	ADF	ProgR pS190	1082.33
HIGH_CTRL_0_2h	CTRL	0	2h	ADF	S6RP pS235-236	32021.3
HIGH_CTRL_0_2h	CTRL	0	2h	ADF	S6RP pS235-236	34751.3
HIGH_CTRL_0_2h	CTRL	0	2h	ADF	S6RP pS235-236	30136.7
HIGH_CTRL_0_8h	CTRL	0	8h	ADF	S6RP pS235-236	32021.3
HIGH_CTRL_0_8h	CTRL	0	8h	ADF	S6RP pS235-236	34751.3
HIGH_CTRL_0_8h	CTRL	0	8h	ADF	S6RP pS235-236	30136.7
HIGH_CTRL_0_2h	CTRL	0	2h	ADF	S6RP pS240-244	29053
HIGH_CTRL_0_2h	CTRL	0	2h	ADF	S6RP pS240-244	27998
HIGH_CTRL_0_2h	CTRL	0	2h	ADF	S6RP pS240-244	29189
HIGH_CTRL_0_8h	CTRL	0	8h	ADF	S6RP pS240-244	29053
HIGH_CTRL_0_8h	CTRL	0	8h	ADF	S6RP pS240-244	27998
HIGH_CTRL_0_8h	CTRL	0	8h	ADF	S6RP pS240-244	29189
HIGH_CTRL_0_2h	CTRL	0	2h	ADF	SAP-JNK pT183-Y185	25567
HIGH_CTRL_0_2h	CTRL	0	2h	ADF	SAP-JNK pT183-Y185	24753
HIGH_CTRL_0_2h	CTRL	0	2h	ADF	SAP-JNK pT183-Y185	25081.3
HIGH_CTRL_0_8h	CTRL	0	8h	ADF	SAP-JNK pT183-Y185	25567
HIGH_CTRL_0_8h	CTRL	0	8h	ADF	SAP-JNK pT183-Y185	24753
HIGH_CTRL_0_8h	CTRL	0	8h	ADF	SAP-JNK pT183-Y185	25081.3
HIGH_CTRL_0_2h	CTRL	0	2h	ADF	SGK pS422	34804
HIGH_CTRL_0_2h	CTRL	0	2h	ADF	SGK pS422	38082
HIGH_CTRL_0_2h	CTRL	0	2h	ADF	SGK pS422	39054
HIGH_CTRL_0_8h	CTRL	0	8h	ADF	SGK pS422	34804
HIGH_CTRL_0_8h	CTRL	0	8h	ADF	SGK pS422	38082
HIGH_CTRL_0_8h	CTRL	0	8h	ADF	SGK pS422	39054
HIGH_CTRL_0_2h	CTRL	0	2h	ADF	SGK3	12792.7
HIGH_CTRL_0_2h	CTRL	0	2h	ADF	SGK3	12300.7
HIGH_CTRL_0_2h	CTRL	0	2h	ADF	SGK3	13438
HIGH_CTRL_0_8h	CTRL	0	8h	ADF	SGK3	12792.7
HIGH_CTRL_0_8h	CTRL	0	8h	ADF	SGK3	12300.7
HIGH_CTRL_0_8h	CTRL	0	8h	ADF	SGK3	13438
HIGH_CTRL_0_2h	CTRL	0	2h	ADF	SMAD1-5-8 pS-S-S	33045
HIGH_CTRL_0_2h	CTRL	0	2h	ADF	SMAD1-5-8 pS-S-S	41627.7
HIGH_CTRL_0_2h	CTRL	0	2h	ADF	SMAD1-5-8 pS-S-S	44646
HIGH_CTRL_0_8h	CTRL	0	8h	ADF	SMAD1-5-8 pS-S-S	33045
HIGH_CTRL_0_8h	CTRL	0	8h	ADF	SMAD1-5-8 pS-S-S	41627.7
HIGH_CTRL_0_8h	CTRL	0	8h	ADF	SMAD1-5-8 pS-S-S	44646
HIGH_CTRL_0_2h	CTRL	0	2h	ADF	SMAD2 pS465-67	7578.67
HIGH_CTRL_0_2h	CTRL	0	2h	ADF	SMAD2 pS465-67	11963
HIGH_CTRL_0_2h	CTRL	0	2h	ADF	SMAD2 pS465-67	18087.3
HIGH_CTRL_0_8h	CTRL	0	8h	ADF	SMAD2 pS465-67	7578.67
HIGH_CTRL_0_8h	CTRL	0	8h	ADF	SMAD2 pS465-67	11963
HIGH_CTRL_0_8h	CTRL	0	8h	ADF	SMAD2 pS465-67	18087.3
HIGH_CTRL_0_2h	CTRL	0	2h	ADF	SRC Family pY416	4070.33
HIGH_CTRL_0_2h	CTRL	0	2h	ADF	SRC Family pY416	4217.67
HIGH_CTRL_0_2h	CTRL	0	2h	ADF	SRC Family pY416	4306
HIGH_CTRL_0_8h	CTRL	0	8h	ADF	SRC Family pY416	4070.33
HIGH_CTRL_0_8h	CTRL	0	8h	ADF	SRC Family pY416	4217.67
HIGH_CTRL_0_8h	CTRL	0	8h	ADF	SRC Family pY416	4306
HIGH_CTRL_0_2h	CTRL	0	2h	ADF	STAT3 pS727	31945.3
HIGH_CTRL_0_2h	CTRL	0	2h	ADF	STAT3 pS727	33318
HIGH_CTRL_0_2h	CTRL	0	2h	ADF	STAT3 pS727	32011.3
HIGH_CTRL_0_8h	CTRL	0	8h	ADF	STAT3 pS727	31945.3
HIGH_CTRL_0_8h	CTRL	0	8h	ADF	STAT3 pS727	33318
HIGH_CTRL_0_8h	CTRL	0	8h	ADF	STAT3 pS727	32011.3
HIGH_CTRL_0_2h	CTRL	0	2h	ADF	STAT3 pY705	1086
HIGH_CTRL_0_2h	CTRL	0	2h	ADF	STAT3 pY705	1205.67
HIGH_CTRL_0_2h	CTRL	0	2h	ADF	STAT3 pY705	1451.33
HIGH_CTRL_0_8h	CTRL	0	8h	ADF	STAT3 pY705	1086
HIGH_CTRL_0_8h	CTRL	0	8h	ADF	STAT3 pY705	1205.67
HIGH_CTRL_0_8h	CTRL	0	8h	ADF	STAT3 pY705	1451.33
HIGH_CTRL_0_2h	CTRL	0	2h	ADF	STAT5 pY694	3226.33
HIGH_CTRL_0_2h	CTRL	0	2h	ADF	STAT5 pY694	3224.67
HIGH_CTRL_0_2h	CTRL	0	2h	ADF	STAT5 pY694	2912
HIGH_CTRL_0_8h	CTRL	0	8h	ADF	STAT5 pY694	3226.33
HIGH_CTRL_0_8h	CTRL	0	8h	ADF	STAT5 pY694	3224.67
HIGH_CTRL_0_8h	CTRL	0	8h	ADF	STAT5 pY694	2912
HIGH_CTRL_0_2h	CTRL	0	2h	ADF	Tuberin pY1571	11257
HIGH_CTRL_0_2h	CTRL	0	2h	ADF	Tuberin pY1571	11615
HIGH_CTRL_0_2h	CTRL	0	2h	ADF	Tuberin pY1571	12907.7
HIGH_CTRL_0_8h	CTRL	0	8h	ADF	Tuberin pY1571	11257
HIGH_CTRL_0_8h	CTRL	0	8h	ADF	Tuberin pY1571	11615
HIGH_CTRL_0_8h	CTRL	0	8h	ADF	Tuberin pY1571	12907.7
HIGH_CTRL_0_2h	CTRL	0	2h	ADF	VEGFR2 pY996	8197
HIGH_CTRL_0_2h	CTRL	0	2h	ADF	VEGFR2 pY996	9850.33
HIGH_CTRL_0_2h	CTRL	0	2h	ADF	VEGFR2 pY996	11852.3
HIGH_CTRL_0_8h	CTRL	0	8h	ADF	VEGFR2 pY996	8197
HIGH_CTRL_0_8h	CTRL	0	8h	ADF	VEGFR2 pY996	9850.33
HIGH_CTRL_0_8h	CTRL	0	8h	ADF	VEGFR2 pY996	11852.3
HIGH_CTRL_0_2h	CTRL	0	2h	ADF	Vimentin	2063
HIGH_CTRL_0_2h	CTRL	0	2h	ADF	Vimentin	1967.67
HIGH_CTRL_0_2h	CTRL	0	2h	ADF	Vimentin	2637
HIGH_CTRL_0_8h	CTRL	0	8h	ADF	Vimentin	2063
HIGH_CTRL_0_8h	CTRL	0	8h	ADF	Vimentin	1967.67
HIGH_CTRL_0_8h	CTRL	0	8h	ADF	Vimentin	2637
HIGH_SI113_IC30_2h	SI113	IC30	2h	ADF	4E-BP1 pT3746	132028
HIGH_SI113_IC30_2h	SI113	IC30	2h	ADF	4E-BP1 pT3746	122185
HIGH_SI113_IC30_2h	SI113	IC30	2h	ADF	4E-BP1 pT3746	129740
HIGH_SI113_IC30_8h	SI113	IC30	8h	ADF	4E-BP1 pT3746	130497
HIGH_SI113_IC30_8h	SI113	IC30	8h	ADF	4E-BP1 pT3746	150019
HIGH_SI113_IC30_8h	SI113	IC30	8h	ADF	4E-BP1 pT3746	116723
HIGH_SI113_IC30_2h	SI113	IC30	2h	ADF	Ac-CoA Carboxylase pS79	31494.3
HIGH_SI113_IC30_2h	SI113	IC30	2h	ADF	Ac-CoA Carboxylase pS79	34313.3
HIGH_SI113_IC30_2h	SI113	IC30	2h	ADF	Ac-CoA Carboxylase pS79	30253
HIGH_SI113_IC30_8h	SI113	IC30	8h	ADF	Ac-CoA Carboxylase pS79	37341
HIGH_SI113_IC30_8h	SI113	IC30	8h	ADF	Ac-CoA Carboxylase pS79	31112
HIGH_SI113_IC30_8h	SI113	IC30	8h	ADF	Ac-CoA Carboxylase pS79	33109
HIGH_SI113_IC30_2h	SI113	IC30	2h	ADF	AKT pS473	6719.67
HIGH_SI113_IC30_2h	SI113	IC30	2h	ADF	AKT pS473	7936.67
HIGH_SI113_IC30_2h	SI113	IC30	2h	ADF	AKT pS473	5118.67
HIGH_SI113_IC30_8h	SI113	IC30	8h	ADF	AKT pS473	2096
HIGH_SI113_IC30_8h	SI113	IC30	8h	ADF	AKT pS473	2994.67
HIGH_SI113_IC30_8h	SI113	IC30	8h	ADF	AKT pS473	3235.33
HIGH_SI113_IC30_2h	SI113	IC30	2h	ADF	AKT pT308	3634
HIGH_SI113_IC30_2h	SI113	IC30	2h	ADF	AKT pT308	4047.33
HIGH_SI113_IC30_2h	SI113	IC30	2h	ADF	AKT pT308	3616
HIGH_SI113_IC30_8h	SI113	IC30	8h	ADF	AKT pT308	3592.67
HIGH_SI113_IC30_8h	SI113	IC30	8h	ADF	AKT pT308	3088
HIGH_SI113_IC30_8h	SI113	IC30	8h	ADF	AKT pT308	3732
HIGH_SI113_IC30_2h	SI113	IC30	2h	ADF	ALDH	36.85
HIGH_SI113_IC30_2h	SI113	IC30	2h	ADF	ALDH	48.8333
HIGH_SI113_IC30_2h	SI113	IC30	2h	ADF	ALDH	48.3333
HIGH_SI113_IC30_8h	SI113	IC30	8h	ADF	ALDH	27.6
HIGH_SI113_IC30_8h	SI113	IC30	8h	ADF	ALDH	73.7
HIGH_SI113_IC30_8h	SI113	IC30	8h	ADF	ALDH	77.9333
HIGH_SI113_IC30_2h	SI113	IC30	2h	ADF	ALK	10910.7
HIGH_SI113_IC30_2h	SI113	IC30	2h	ADF	ALK	11595
HIGH_SI113_IC30_2h	SI113	IC30	2h	ADF	ALK	9586.33
HIGH_SI113_IC30_8h	SI113	IC30	8h	ADF	ALK	10755
HIGH_SI113_IC30_8h	SI113	IC30	8h	ADF	ALK	7482.67
HIGH_SI113_IC30_8h	SI113	IC30	8h	ADF	ALK	7941.67
HIGH_SI113_IC30_2h	SI113	IC30	2h	ADF	AMPKa pS485	10869.3
HIGH_SI113_IC30_2h	SI113	IC30	2h	ADF	AMPKa pS485	11631
HIGH_SI113_IC30_2h	SI113	IC30	2h	ADF	AMPKa pS485	10398
HIGH_SI113_IC30_8h	SI113	IC30	8h	ADF	AMPKa pS485	10343.3
HIGH_SI113_IC30_8h	SI113	IC30	8h	ADF	AMPKa pS485	6140
HIGH_SI113_IC30_8h	SI113	IC30	8h	ADF	AMPKa pS485	6610.33
HIGH_SI113_IC30_2h	SI113	IC30	2h	ADF	AMPKa pT172	2350
HIGH_SI113_IC30_2h	SI113	IC30	2h	ADF	AMPKa pT172	4536.33
HIGH_SI113_IC30_2h	SI113	IC30	2h	ADF	AMPKa pT172	4796.67
HIGH_SI113_IC30_8h	SI113	IC30	8h	ADF	AMPKa pT172	8145.67
HIGH_SI113_IC30_8h	SI113	IC30	8h	ADF	AMPKa pT172	6746
HIGH_SI113_IC30_8h	SI113	IC30	8h	ADF	AMPKa pT172	8453.67
HIGH_SI113_IC30_2h	SI113	IC30	2h	ADF	AMPKb pS108	10365.3
HIGH_SI113_IC30_2h	SI113	IC30	2h	ADF	AMPKb pS108	11810.7
HIGH_SI113_IC30_2h	SI113	IC30	2h	ADF	AMPKb pS108	8364
HIGH_SI113_IC30_8h	SI113	IC30	8h	ADF	AMPKb pS108	16339
HIGH_SI113_IC30_8h	SI113	IC30	8h	ADF	AMPKb pS108	7880.33
HIGH_SI113_IC30_8h	SI113	IC30	8h	ADF	AMPKb pS108	15318.3
HIGH_SI113_IC30_2h	SI113	IC30	2h	ADF	AndrRec	2066.67
HIGH_SI113_IC30_2h	SI113	IC30	2h	ADF	AndrRec	1996
HIGH_SI113_IC30_2h	SI113	IC30	2h	ADF	AndrRec	1591
HIGH_SI113_IC30_8h	SI113	IC30	8h	ADF	AndrRec	2366.67
HIGH_SI113_IC30_8h	SI113	IC30	8h	ADF	AndrRec	1799
HIGH_SI113_IC30_8h	SI113	IC30	8h	ADF	AndrRec	2060.67
HIGH_SI113_IC30_2h	SI113	IC30	2h	ADF	ASK1 pS83	1594.67
HIGH_SI113_IC30_2h	SI113	IC30	2h	ADF	ASK1 pS83	1466
HIGH_SI113_IC30_2h	SI113	IC30	2h	ADF	ASK1 pS83	1268
HIGH_SI113_IC30_8h	SI113	IC30	8h	ADF	ASK1 pS83	1608.67
HIGH_SI113_IC30_8h	SI113	IC30	8h	ADF	ASK1 pS83	1095.33
HIGH_SI113_IC30_8h	SI113	IC30	8h	ADF	ASK1 pS83	1398
HIGH_SI113_IC30_2h	SI113	IC30	2h	ADF	ATP-Citrate Lyase pS454	40378.7
HIGH_SI113_IC30_2h	SI113	IC30	2h	ADF	ATP-Citrate Lyase pS454	40215
HIGH_SI113_IC30_2h	SI113	IC30	2h	ADF	ATP-Citrate Lyase pS454	37645.3
HIGH_SI113_IC30_8h	SI113	IC30	8h	ADF	ATP-Citrate Lyase pS454	36613
HIGH_SI113_IC30_8h	SI113	IC30	8h	ADF	ATP-Citrate Lyase pS454	29438.7
HIGH_SI113_IC30_8h	SI113	IC30	8h	ADF	ATP-Citrate Lyase pS454	36591
HIGH_SI113_IC30_2h	SI113	IC30	2h	ADF	BAD pS112	7992
HIGH_SI113_IC30_2h	SI113	IC30	2h	ADF	BAD pS112	7607
HIGH_SI113_IC30_2h	SI113	IC30	2h	ADF	BAD pS112	7304.33
HIGH_SI113_IC30_8h	SI113	IC30	8h	ADF	BAD pS112	10783.3
HIGH_SI113_IC30_8h	SI113	IC30	8h	ADF	BAD pS112	8584.67
HIGH_SI113_IC30_8h	SI113	IC30	8h	ADF	BAD pS112	10415.7
HIGH_SI113_IC30_2h	SI113	IC30	2h	ADF	BAD pS155	21052
HIGH_SI113_IC30_2h	SI113	IC30	2h	ADF	BAD pS155	20195.3
HIGH_SI113_IC30_2h	SI113	IC30	2h	ADF	BAD pS155	20127.3
HIGH_SI113_IC30_8h	SI113	IC30	8h	ADF	BAD pS155	24000
HIGH_SI113_IC30_8h	SI113	IC30	8h	ADF	BAD pS155	19525
HIGH_SI113_IC30_8h	SI113	IC30	8h	ADF	BAD pS155	22271.3
HIGH_SI113_IC30_2h	SI113	IC30	2h	ADF	b-Catenin pT41/pS45	10619
HIGH_SI113_IC30_2h	SI113	IC30	2h	ADF	b-Catenin pT41/pS45	10208.3
HIGH_SI113_IC30_2h	SI113	IC30	2h	ADF	b-Catenin pT41/pS45	9036
HIGH_SI113_IC30_8h	SI113	IC30	8h	ADF	b-Catenin pT41/pS45	12711.7
HIGH_SI113_IC30_8h	SI113	IC30	8h	ADF	b-Catenin pT41/pS45	8407.67
HIGH_SI113_IC30_8h	SI113	IC30	8h	ADF	b-Catenin pT41/pS45	10427
HIGH_SI113_IC30_2h	SI113	IC30	2h	ADF	c-ABL pT735	11999
HIGH_SI113_IC30_2h	SI113	IC30	2h	ADF	c-ABL pT735	13820
HIGH_SI113_IC30_2h	SI113	IC30	2h	ADF	c-ABL pT735	12228.3
HIGH_SI113_IC30_8h	SI113	IC30	8h	ADF	c-ABL pT735	13981.7
HIGH_SI113_IC30_8h	SI113	IC30	8h	ADF	c-ABL pT735	9335
HIGH_SI113_IC30_8h	SI113	IC30	8h	ADF	c-ABL pT735	9629
HIGH_SI113_IC30_2h	SI113	IC30	2h	ADF	c-ABL pY245	464.667
HIGH_SI113_IC30_2h	SI113	IC30	2h	ADF	c-ABL pY245	458.333
HIGH_SI113_IC30_2h	SI113	IC30	2h	ADF	c-ABL pY245	528.667
HIGH_SI113_IC30_8h	SI113	IC30	8h	ADF	c-ABL pY245	537.333
HIGH_SI113_IC30_8h	SI113	IC30	8h	ADF	c-ABL pY245	639.333
HIGH_SI113_IC30_8h	SI113	IC30	8h	ADF	c-ABL pY245	760.667
HIGH_SI113_IC30_2h	SI113	IC30	2h	ADF	c-Myc pS62	4587.67
HIGH_SI113_IC30_2h	SI113	IC30	2h	ADF	c-Myc pS62	4114
HIGH_SI113_IC30_2h	SI113	IC30	2h	ADF	c-Myc pS62	4120.67
HIGH_SI113_IC30_8h	SI113	IC30	8h	ADF	c-Myc pS62	4287.33
HIGH_SI113_IC30_8h	SI113	IC30	8h	ADF	c-Myc pS62	1942.67
HIGH_SI113_IC30_8h	SI113	IC30	8h	ADF	c-Myc pS62	2920
HIGH_SI113_IC30_2h	SI113	IC30	2h	ADF	Cyclin B1	34755
HIGH_SI113_IC30_2h	SI113	IC30	2h	ADF	Cyclin B1	35543.3
HIGH_SI113_IC30_2h	SI113	IC30	2h	ADF	Cyclin B1	30616.7
HIGH_SI113_IC30_8h	SI113	IC30	8h	ADF	Cyclin B1	28409
HIGH_SI113_IC30_8h	SI113	IC30	8h	ADF	Cyclin B1	24576
HIGH_SI113_IC30_8h	SI113	IC30	8h	ADF	Cyclin B1	24327.3
HIGH_SI113_IC30_2h	SI113	IC30	2h	ADF	Cyclin D1	11662.7
HIGH_SI113_IC30_2h	SI113	IC30	2h	ADF	Cyclin D1	11199.7
HIGH_SI113_IC30_2h	SI113	IC30	2h	ADF	Cyclin D1	12536.7
HIGH_SI113_IC30_8h	SI113	IC30	8h	ADF	Cyclin D1	13733.3
HIGH_SI113_IC30_8h	SI113	IC30	8h	ADF	Cyclin D1	8339.67
HIGH_SI113_IC30_8h	SI113	IC30	8h	ADF	Cyclin D1	11196.3
HIGH_SI113_IC30_2h	SI113	IC30	2h	ADF	EGFR pY1173	7910.67
HIGH_SI113_IC30_2h	SI113	IC30	2h	ADF	EGFR pY1173	7630.33
HIGH_SI113_IC30_2h	SI113	IC30	2h	ADF	EGFR pY1173	7967.67
HIGH_SI113_IC30_8h	SI113	IC30	8h	ADF	EGFR pY1173	8506
HIGH_SI113_IC30_8h	SI113	IC30	8h	ADF	EGFR pY1173	5620.67
HIGH_SI113_IC30_8h	SI113	IC30	8h	ADF	EGFR pY1173	8058
HIGH_SI113_IC30_2h	SI113	IC30	2h	ADF	EGFR pY845 MILK	147.567
HIGH_SI113_IC30_2h	SI113	IC30	2h	ADF	EGFR pY845 MILK	141.2
HIGH_SI113_IC30_2h	SI113	IC30	2h	ADF	EGFR pY845 MILK	140.667
HIGH_SI113_IC30_8h	SI113	IC30	8h	ADF	EGFR pY845 MILK	124.867
HIGH_SI113_IC30_8h	SI113	IC30	8h	ADF	EGFR pY845 MILK	177.7
HIGH_SI113_IC30_8h	SI113	IC30	8h	ADF	EGFR pY845 MILK	79.5
HIGH_SI113_IC30_2h	SI113	IC30	2h	ADF	ERG	32079.3
HIGH_SI113_IC30_2h	SI113	IC30	2h	ADF	ERG	35813.3
HIGH_SI113_IC30_2h	SI113	IC30	2h	ADF	ERG	32794
HIGH_SI113_IC30_8h	SI113	IC30	8h	ADF	ERG	33615.3
HIGH_SI113_IC30_8h	SI113	IC30	8h	ADF	ERG	27209.3
HIGH_SI113_IC30_8h	SI113	IC30	8h	ADF	ERG	28925.7
HIGH_SI113_IC30_2h	SI113	IC30	2h	ADF	Fatty Acid Synthase	10567.3
HIGH_SI113_IC30_2h	SI113	IC30	2h	ADF	Fatty Acid Synthase	14537
HIGH_SI113_IC30_2h	SI113	IC30	2h	ADF	Fatty Acid Synthase	13500.3
HIGH_SI113_IC30_8h	SI113	IC30	8h	ADF	Fatty Acid Synthase	13573.3
HIGH_SI113_IC30_8h	SI113	IC30	8h	ADF	Fatty Acid Synthase	7747
HIGH_SI113_IC30_8h	SI113	IC30	8h	ADF	Fatty Acid Synthase	12272.3
HIGH_SI113_IC30_2h	SI113	IC30	2h	ADF	Fodrin-a cl. D1185	8993.67
HIGH_SI113_IC30_2h	SI113	IC30	2h	ADF	Fodrin-a cl. D1185	7590
HIGH_SI113_IC30_2h	SI113	IC30	2h	ADF	Fodrin-a cl. D1185	7893.33
HIGH_SI113_IC30_8h	SI113	IC30	8h	ADF	Fodrin-a cl. D1185	9180.33
HIGH_SI113_IC30_8h	SI113	IC30	8h	ADF	Fodrin-a cl. D1185	5917.33
HIGH_SI113_IC30_8h	SI113	IC30	8h	ADF	Fodrin-a cl. D1185	7489.33
HIGH_SI113_IC30_2h	SI113	IC30	2h	ADF	FOXO1 pT24-FOXO3a pT32	6698.67
HIGH_SI113_IC30_2h	SI113	IC30	2h	ADF	FOXO1 pT24-FOXO3a pT32	6989.33
HIGH_SI113_IC30_2h	SI113	IC30	2h	ADF	FOXO1 pT24-FOXO3a pT32	5545.33
HIGH_SI113_IC30_8h	SI113	IC30	8h	ADF	FOXO1 pT24-FOXO3a pT32	6837.33
HIGH_SI113_IC30_8h	SI113	IC30	8h	ADF	FOXO1 pT24-FOXO3a pT32	5420
HIGH_SI113_IC30_8h	SI113	IC30	8h	ADF	FOXO1 pT24-FOXO3a pT32	8335
HIGH_SI113_IC30_2h	SI113	IC30	2h	ADF	GSK3ab pS21-9	23118.7
HIGH_SI113_IC30_2h	SI113	IC30	2h	ADF	GSK3ab pS21-9	22624.3
HIGH_SI113_IC30_2h	SI113	IC30	2h	ADF	GSK3ab pS21-9	18935.7
HIGH_SI113_IC30_8h	SI113	IC30	8h	ADF	GSK3ab pS21-9	19587.7
HIGH_SI113_IC30_8h	SI113	IC30	8h	ADF	GSK3ab pS21-9	9152.67
HIGH_SI113_IC30_8h	SI113	IC30	8h	ADF	GSK3ab pS21-9	12116
HIGH_SI113_IC30_2h	SI113	IC30	2h	ADF	GSK3-a/b pS279	36169
HIGH_SI113_IC30_2h	SI113	IC30	2h	ADF	GSK3-a/b pS279	36072.7
HIGH_SI113_IC30_2h	SI113	IC30	2h	ADF	GSK3-a/b pS279	32986.3
HIGH_SI113_IC30_8h	SI113	IC30	8h	ADF	GSK3-a/b pS279	47755.3
HIGH_SI113_IC30_8h	SI113	IC30	8h	ADF	GSK3-a/b pS279	35831.7
HIGH_SI113_IC30_8h	SI113	IC30	8h	ADF	GSK3-a/b pS279	40522.3
HIGH_SI113_IC30_2h	SI113	IC30	2h	ADF	GSK3b pS9	34721.7
HIGH_SI113_IC30_2h	SI113	IC30	2h	ADF	GSK3b pS9	30882.7
HIGH_SI113_IC30_2h	SI113	IC30	2h	ADF	GSK3b pS9	26056.3
HIGH_SI113_IC30_8h	SI113	IC30	8h	ADF	GSK3b pS9	27874.3
HIGH_SI113_IC30_8h	SI113	IC30	8h	ADF	GSK3b pS9	19273.7
HIGH_SI113_IC30_8h	SI113	IC30	8h	ADF	GSK3b pS9	26202.7
HIGH_SI113_IC30_2h	SI113	IC30	2h	ADF	H3-Histone pS10	47057
HIGH_SI113_IC30_2h	SI113	IC30	2h	ADF	H3-Histone pS10	32402
HIGH_SI113_IC30_2h	SI113	IC30	2h	ADF	H3-Histone pS10	37661.3
HIGH_SI113_IC30_8h	SI113	IC30	8h	ADF	H3-Histone pS10	30267
HIGH_SI113_IC30_8h	SI113	IC30	8h	ADF	H3-Histone pS10	28889.7
HIGH_SI113_IC30_8h	SI113	IC30	8h	ADF	H3-Histone pS10	26150.3
HIGH_SI113_IC30_2h	SI113	IC30	2h	ADF	IRS-1 pS612	3597
HIGH_SI113_IC30_2h	SI113	IC30	2h	ADF	IRS-1 pS612	3628
HIGH_SI113_IC30_2h	SI113	IC30	2h	ADF	IRS-1 pS612	2914.33
HIGH_SI113_IC30_8h	SI113	IC30	8h	ADF	IRS-1 pS612	5034.33
HIGH_SI113_IC30_8h	SI113	IC30	8h	ADF	IRS-1 pS612	2647.67
HIGH_SI113_IC30_8h	SI113	IC30	8h	ADF	IRS-1 pS612	2622.67
HIGH_SI113_IC30_2h	SI113	IC30	2h	ADF	p27_Kip1	3457.33
HIGH_SI113_IC30_2h	SI113	IC30	2h	ADF	p27_Kip1	2746.67
HIGH_SI113_IC30_2h	SI113	IC30	2h	ADF	p27_Kip1	2241.33
HIGH_SI113_IC30_8h	SI113	IC30	8h	ADF	p27_Kip1	3397
HIGH_SI113_IC30_8h	SI113	IC30	8h	ADF	p27_Kip1	2532.33
HIGH_SI113_IC30_8h	SI113	IC30	8h	ADF	p27_Kip1	2959
HIGH_SI113_IC30_2h	SI113	IC30	2h	ADF	LKB1 pS334	45891.3
HIGH_SI113_IC30_2h	SI113	IC30	2h	ADF	LKB1 pS334	40647.7
HIGH_SI113_IC30_2h	SI113	IC30	2h	ADF	LKB1 pS334	39597.7
HIGH_SI113_IC30_8h	SI113	IC30	8h	ADF	LKB1 pS334	40673.3
HIGH_SI113_IC30_8h	SI113	IC30	8h	ADF	LKB1 pS334	40164
HIGH_SI113_IC30_8h	SI113	IC30	8h	ADF	LKB1 pS334	42283
HIGH_SI113_IC30_2h	SI113	IC30	2h	ADF	MDM2 pS166	4322.67
HIGH_SI113_IC30_2h	SI113	IC30	2h	ADF	MDM2 pS166	3901.67
HIGH_SI113_IC30_2h	SI113	IC30	2h	ADF	MDM2 pS166	3489.67
HIGH_SI113_IC30_8h	SI113	IC30	8h	ADF	MDM2 pS166	6165.33
HIGH_SI113_IC30_8h	SI113	IC30	8h	ADF	MDM2 pS166	4392
HIGH_SI113_IC30_8h	SI113	IC30	8h	ADF	MDM2 pS166	5483.67
HIGH_SI113_IC30_2h	SI113	IC30	2h	ADF	MEK1-2 pS217-21	87764
HIGH_SI113_IC30_2h	SI113	IC30	2h	ADF	MEK1-2 pS217-21	82601.3
HIGH_SI113_IC30_2h	SI113	IC30	2h	ADF	MEK1-2 pS217-21	75671
HIGH_SI113_IC30_8h	SI113	IC30	8h	ADF	MEK1-2 pS217-21	88086
HIGH_SI113_IC30_8h	SI113	IC30	8h	ADF	MEK1-2 pS217-21	82772
HIGH_SI113_IC30_8h	SI113	IC30	8h	ADF	MEK1-2 pS217-21	98373
HIGH_SI113_IC30_2h	SI113	IC30	2h	ADF	MKK4 pS80	5305.67
HIGH_SI113_IC30_2h	SI113	IC30	2h	ADF	MKK4 pS80	4754.67
HIGH_SI113_IC30_2h	SI113	IC30	2h	ADF	MKK4 pS80	5624.33
HIGH_SI113_IC30_8h	SI113	IC30	8h	ADF	MKK4 pS80	5914
HIGH_SI113_IC30_8h	SI113	IC30	8h	ADF	MKK4 pS80	4477.67
HIGH_SI113_IC30_8h	SI113	IC30	8h	ADF	MKK4 pS80	5533.33
HIGH_SI113_IC30_2h	SI113	IC30	2h	ADF	MSK1 pS360	4547
HIGH_SI113_IC30_2h	SI113	IC30	2h	ADF	MSK1 pS360	4465.33
HIGH_SI113_IC30_2h	SI113	IC30	2h	ADF	MSK1 pS360	4050.33
HIGH_SI113_IC30_8h	SI113	IC30	8h	ADF	MSK1 pS360	5120.33
HIGH_SI113_IC30_8h	SI113	IC30	8h	ADF	MSK1 pS360	3851.67
HIGH_SI113_IC30_8h	SI113	IC30	8h	ADF	MSK1 pS360	3864.33
HIGH_SI113_IC30_2h	SI113	IC30	2h	ADF	mTOR pS2448	16022.3
HIGH_SI113_IC30_2h	SI113	IC30	2h	ADF	mTOR pS2448	16050.7
HIGH_SI113_IC30_2h	SI113	IC30	2h	ADF	mTOR pS2448	12832.7
HIGH_SI113_IC30_8h	SI113	IC30	8h	ADF	mTOR pS2448	22135.3
HIGH_SI113_IC30_8h	SI113	IC30	8h	ADF	mTOR pS2448	7980
HIGH_SI113_IC30_8h	SI113	IC30	8h	ADF	mTOR pS2448	16722.3
HIGH_SI113_IC30_2h	SI113	IC30	2h	ADF	mTOR pS2481	12665
HIGH_SI113_IC30_2h	SI113	IC30	2h	ADF	mTOR pS2481	12766.3
HIGH_SI113_IC30_2h	SI113	IC30	2h	ADF	mTOR pS2481	10259
HIGH_SI113_IC30_8h	SI113	IC30	8h	ADF	mTOR pS2481	12437.3
HIGH_SI113_IC30_8h	SI113	IC30	8h	ADF	mTOR pS2481	11308.3
HIGH_SI113_IC30_8h	SI113	IC30	8h	ADF	mTOR pS2481	11121.7
HIGH_SI113_IC30_2h	SI113	IC30	2h	ADF	NDRG1 pT346	60522.3
HIGH_SI113_IC30_2h	SI113	IC30	2h	ADF	NDRG1 pT346	62165.7
HIGH_SI113_IC30_2h	SI113	IC30	2h	ADF	NDRG1 pT346	57629
HIGH_SI113_IC30_8h	SI113	IC30	8h	ADF	NDRG1 pT346	57091.3
HIGH_SI113_IC30_8h	SI113	IC30	8h	ADF	NDRG1 pT346	46909.7
HIGH_SI113_IC30_8h	SI113	IC30	8h	ADF	NDRG1 pT346	56815
HIGH_SI113_IC30_2h	SI113	IC30	2h	ADF	NDRG1_pS330	21262.3
HIGH_SI113_IC30_2h	SI113	IC30	2h	ADF	NDRG1_pS330	21771.3
HIGH_SI113_IC30_2h	SI113	IC30	2h	ADF	NDRG1_pS330	21981.3
HIGH_SI113_IC30_8h	SI113	IC30	8h	ADF	NDRG1_pS330	19704.3
HIGH_SI113_IC30_8h	SI113	IC30	8h	ADF	NDRG1_pS330	16726.7
HIGH_SI113_IC30_8h	SI113	IC30	8h	ADF	NDRG1_pS330	15795.7
HIGH_SI113_IC30_2h	SI113	IC30	2h	ADF	NDRG1_pS330	17611.3
HIGH_SI113_IC30_2h	SI113	IC30	2h	ADF	NDRG1_pS330	18578.7
HIGH_SI113_IC30_2h	SI113	IC30	2h	ADF	NDRG1_pS330	18189.3
HIGH_SI113_IC30_8h	SI113	IC30	8h	ADF	NDRG1_pS330	17179.7
HIGH_SI113_IC30_8h	SI113	IC30	8h	ADF	NDRG1_pS330	13573.7
HIGH_SI113_IC30_8h	SI113	IC30	8h	ADF	NDRG1_pS330	13129
HIGH_SI113_IC30_2h	SI113	IC30	2h	ADF	p16_INK4A	2002.33
HIGH_SI113_IC30_2h	SI113	IC30	2h	ADF	p16_INK4A	1835.33
HIGH_SI113_IC30_2h	SI113	IC30	2h	ADF	p16_INK4A	1894
HIGH_SI113_IC30_8h	SI113	IC30	8h	ADF	p16_INK4A	2477
HIGH_SI113_IC30_8h	SI113	IC30	8h	ADF	p16_INK4A	1737
HIGH_SI113_IC30_8h	SI113	IC30	8h	ADF	p16_INK4A	1803.67
HIGH_SI113_IC30_2h	SI113	IC30	2h	ADF	p21_Waf1/Cip1	537
HIGH_SI113_IC30_2h	SI113	IC30	2h	ADF	p21_Waf1/Cip1	568
HIGH_SI113_IC30_2h	SI113	IC30	2h	ADF	p21_Waf1/Cip1	573.667
HIGH_SI113_IC30_8h	SI113	IC30	8h	ADF	p21_Waf1/Cip1	595.333
HIGH_SI113_IC30_8h	SI113	IC30	8h	ADF	p21_Waf1/Cip1	611.333
HIGH_SI113_IC30_8h	SI113	IC30	8h	ADF	p21_Waf1/Cip1	686.333
HIGH_SI113_IC30_2h	SI113	IC30	2h	ADF	p70S6K pS371	6195
HIGH_SI113_IC30_2h	SI113	IC30	2h	ADF	p70S6K pS371	5184
HIGH_SI113_IC30_2h	SI113	IC30	2h	ADF	p70S6K pS371	4585
HIGH_SI113_IC30_8h	SI113	IC30	8h	ADF	p70S6K pS371	6839.33
HIGH_SI113_IC30_8h	SI113	IC30	8h	ADF	p70S6K pS371	4827.33
HIGH_SI113_IC30_8h	SI113	IC30	8h	ADF	p70S6K pS371	6465.33
HIGH_SI113_IC30_2h	SI113	IC30	2h	ADF	p90RSK pS380	5593.67
HIGH_SI113_IC30_2h	SI113	IC30	2h	ADF	p90RSK pS380	5965.67
HIGH_SI113_IC30_2h	SI113	IC30	2h	ADF	p90RSK pS380	5264.67
HIGH_SI113_IC30_8h	SI113	IC30	8h	ADF	p90RSK pS380	6418
HIGH_SI113_IC30_8h	SI113	IC30	8h	ADF	p90RSK pS380	4626.67
HIGH_SI113_IC30_8h	SI113	IC30	8h	ADF	p90RSK pS380	5588
HIGH_SI113_IC30_2h	SI113	IC30	2h	ADF	PARP D214	2035
HIGH_SI113_IC30_2h	SI113	IC30	2h	ADF	PARP D214	1972.33
HIGH_SI113_IC30_2h	SI113	IC30	2h	ADF	PARP D214	1829.33
HIGH_SI113_IC30_8h	SI113	IC30	8h	ADF	PARP D214	2015
HIGH_SI113_IC30_8h	SI113	IC30	8h	ADF	PARP D214	2106.67
HIGH_SI113_IC30_8h	SI113	IC30	8h	ADF	PARP D214	2429.67
HIGH_SI113_IC30_2h	SI113	IC30	2h	ADF	PDGFR-b pY751	3365.67
HIGH_SI113_IC30_2h	SI113	IC30	2h	ADF	PDGFR-b pY751	3312.67
HIGH_SI113_IC30_2h	SI113	IC30	2h	ADF	PDGFR-b pY751	3007.67
HIGH_SI113_IC30_8h	SI113	IC30	8h	ADF	PDGFR-b pY751	4259.33
HIGH_SI113_IC30_8h	SI113	IC30	8h	ADF	PDGFR-b pY751	3348
HIGH_SI113_IC30_8h	SI113	IC30	8h	ADF	PDGFR-b pY751	4418.33
HIGH_SI113_IC30_2h	SI113	IC30	2h	ADF	PRAS40 pT246	13291
HIGH_SI113_IC30_2h	SI113	IC30	2h	ADF	PRAS40 pT246	14564
HIGH_SI113_IC30_2h	SI113	IC30	2h	ADF	PRAS40 pT246	14151.3
HIGH_SI113_IC30_8h	SI113	IC30	8h	ADF	PRAS40 pT246	13093
HIGH_SI113_IC30_8h	SI113	IC30	8h	ADF	PRAS40 pT246	4156.67
HIGH_SI113_IC30_8h	SI113	IC30	8h	ADF	PRAS40 pT246	6083
HIGH_SI113_IC30_2h	SI113	IC30	2h	ADF	ProgR pS190	538.5
HIGH_SI113_IC30_2h	SI113	IC30	2h	ADF	ProgR pS190	915.667
HIGH_SI113_IC30_2h	SI113	IC30	2h	ADF	ProgR pS190	746.667
HIGH_SI113_IC30_8h	SI113	IC30	8h	ADF	ProgR pS190	981.667
HIGH_SI113_IC30_8h	SI113	IC30	8h	ADF	ProgR pS190	607.667
HIGH_SI113_IC30_8h	SI113	IC30	8h	ADF	ProgR pS190	782
HIGH_SI113_IC30_2h	SI113	IC30	2h	ADF	S6RP pS235-236	8492.67
HIGH_SI113_IC30_2h	SI113	IC30	2h	ADF	S6RP pS235-236	10171.7
HIGH_SI113_IC30_2h	SI113	IC30	2h	ADF	S6RP pS235-236	8936
HIGH_SI113_IC30_8h	SI113	IC30	8h	ADF	S6RP pS235-236	16460.3
HIGH_SI113_IC30_8h	SI113	IC30	8h	ADF	S6RP pS235-236	4246.5
HIGH_SI113_IC30_8h	SI113	IC30	8h	ADF	S6RP pS235-236	22794
HIGH_SI113_IC30_2h	SI113	IC30	2h	ADF	S6RP pS240-244	11543
HIGH_SI113_IC30_2h	SI113	IC30	2h	ADF	S6RP pS240-244	13719.3
HIGH_SI113_IC30_2h	SI113	IC30	2h	ADF	S6RP pS240-244	4549
HIGH_SI113_IC30_8h	SI113	IC30	8h	ADF	S6RP pS240-244	14992
HIGH_SI113_IC30_8h	SI113	IC30	8h	ADF	S6RP pS240-244	21462.7
HIGH_SI113_IC30_8h	SI113	IC30	8h	ADF	S6RP pS240-244	28007.3
HIGH_SI113_IC30_2h	SI113	IC30	2h	ADF	SAP-JNK pT183-Y185	19952.3
HIGH_SI113_IC30_2h	SI113	IC30	2h	ADF	SAP-JNK pT183-Y185	17614.3
HIGH_SI113_IC30_2h	SI113	IC30	2h	ADF	SAP-JNK pT183-Y185	18579
HIGH_SI113_IC30_8h	SI113	IC30	8h	ADF	SAP-JNK pT183-Y185	33787.7
HIGH_SI113_IC30_8h	SI113	IC30	8h	ADF	SAP-JNK pT183-Y185	13683
HIGH_SI113_IC30_8h	SI113	IC30	8h	ADF	SAP-JNK pT183-Y185	15791
HIGH_SI113_IC30_2h	SI113	IC30	2h	ADF	SGK pS422	30517.7
HIGH_SI113_IC30_2h	SI113	IC30	2h	ADF	SGK pS422	36462.3
HIGH_SI113_IC30_2h	SI113	IC30	2h	ADF	SGK pS422	32161
HIGH_SI113_IC30_8h	SI113	IC30	8h	ADF	SGK pS422	37123
HIGH_SI113_IC30_8h	SI113	IC30	8h	ADF	SGK pS422	31945.3
HIGH_SI113_IC30_8h	SI113	IC30	8h	ADF	SGK pS422	33810
HIGH_SI113_IC30_2h	SI113	IC30	2h	ADF	SGK3	12286
HIGH_SI113_IC30_2h	SI113	IC30	2h	ADF	SGK3	12977.3
HIGH_SI113_IC30_2h	SI113	IC30	2h	ADF	SGK3	10632.7
HIGH_SI113_IC30_8h	SI113	IC30	8h	ADF	SGK3	12204
HIGH_SI113_IC30_8h	SI113	IC30	8h	ADF	SGK3	9774.67
HIGH_SI113_IC30_8h	SI113	IC30	8h	ADF	SGK3	12417
HIGH_SI113_IC30_2h	SI113	IC30	2h	ADF	SMAD1-5-8 pS-S-S	44784
HIGH_SI113_IC30_2h	SI113	IC30	2h	ADF	SMAD1-5-8 pS-S-S	46097.7
HIGH_SI113_IC30_2h	SI113	IC30	2h	ADF	SMAD1-5-8 pS-S-S	38405.7
HIGH_SI113_IC30_8h	SI113	IC30	8h	ADF	SMAD1-5-8 pS-S-S	38667
HIGH_SI113_IC30_8h	SI113	IC30	8h	ADF	SMAD1-5-8 pS-S-S	32326.3
HIGH_SI113_IC30_8h	SI113	IC30	8h	ADF	SMAD1-5-8 pS-S-S	35100.3
HIGH_SI113_IC30_2h	SI113	IC30	2h	ADF	SMAD2 pS465-67	28022.7
HIGH_SI113_IC30_2h	SI113	IC30	2h	ADF	SMAD2 pS465-67	27079.3
HIGH_SI113_IC30_2h	SI113	IC30	2h	ADF	SMAD2 pS465-67	23652
HIGH_SI113_IC30_8h	SI113	IC30	8h	ADF	SMAD2 pS465-67	23900
HIGH_SI113_IC30_8h	SI113	IC30	8h	ADF	SMAD2 pS465-67	13114.7
HIGH_SI113_IC30_8h	SI113	IC30	8h	ADF	SMAD2 pS465-67	16269.7
HIGH_SI113_IC30_2h	SI113	IC30	2h	ADF	SRC Family pY416	3030.33
HIGH_SI113_IC30_2h	SI113	IC30	2h	ADF	SRC Family pY416	2519.33
HIGH_SI113_IC30_2h	SI113	IC30	2h	ADF	SRC Family pY416	2639.67
HIGH_SI113_IC30_8h	SI113	IC30	8h	ADF	SRC Family pY416	3576
HIGH_SI113_IC30_8h	SI113	IC30	8h	ADF	SRC Family pY416	2966
HIGH_SI113_IC30_8h	SI113	IC30	8h	ADF	SRC Family pY416	3359.67
HIGH_SI113_IC30_2h	SI113	IC30	2h	ADF	STAT3 pS727	24176
HIGH_SI113_IC30_2h	SI113	IC30	2h	ADF	STAT3 pS727	23283.7
HIGH_SI113_IC30_2h	SI113	IC30	2h	ADF	STAT3 pS727	17937.7
HIGH_SI113_IC30_8h	SI113	IC30	8h	ADF	STAT3 pS727	25819
HIGH_SI113_IC30_8h	SI113	IC30	8h	ADF	STAT3 pS727	20578.7
HIGH_SI113_IC30_8h	SI113	IC30	8h	ADF	STAT3 pS727	23497.3
HIGH_SI113_IC30_2h	SI113	IC30	2h	ADF	STAT3 pY705	1151.67
HIGH_SI113_IC30_2h	SI113	IC30	2h	ADF	STAT3 pY705	1455.33
HIGH_SI113_IC30_2h	SI113	IC30	2h	ADF	STAT3 pY705	2540.33
HIGH_SI113_IC30_8h	SI113	IC30	8h	ADF	STAT3 pY705	1164.67
HIGH_SI113_IC30_8h	SI113	IC30	8h	ADF	STAT3 pY705	915
HIGH_SI113_IC30_8h	SI113	IC30	8h	ADF	STAT3 pY705	747
HIGH_SI113_IC30_2h	SI113	IC30	2h	ADF	STAT5 pY694	2274
HIGH_SI113_IC30_2h	SI113	IC30	2h	ADF	STAT5 pY694	2264.33
HIGH_SI113_IC30_2h	SI113	IC30	2h	ADF	STAT5 pY694	2687.33
HIGH_SI113_IC30_8h	SI113	IC30	8h	ADF	STAT5 pY694	2967.33
HIGH_SI113_IC30_8h	SI113	IC30	8h	ADF	STAT5 pY694	4326.67
HIGH_SI113_IC30_8h	SI113	IC30	8h	ADF	STAT5 pY694	4409.67
HIGH_SI113_IC30_2h	SI113	IC30	2h	ADF	Tuberin pY1571	12143.3
HIGH_SI113_IC30_2h	SI113	IC30	2h	ADF	Tuberin pY1571	9927
HIGH_SI113_IC30_2h	SI113	IC30	2h	ADF	Tuberin pY1571	9550
HIGH_SI113_IC30_8h	SI113	IC30	8h	ADF	Tuberin pY1571	12188
HIGH_SI113_IC30_8h	SI113	IC30	8h	ADF	Tuberin pY1571	8955
HIGH_SI113_IC30_8h	SI113	IC30	8h	ADF	Tuberin pY1571	10809.7
HIGH_SI113_IC30_2h	SI113	IC30	2h	ADF	VEGFR2 pY996	6999
HIGH_SI113_IC30_2h	SI113	IC30	2h	ADF	VEGFR2 pY996	7138.67
HIGH_SI113_IC30_2h	SI113	IC30	2h	ADF	VEGFR2 pY996	6311.67
HIGH_SI113_IC30_8h	SI113	IC30	8h	ADF	VEGFR2 pY996	7741.67
HIGH_SI113_IC30_8h	SI113	IC30	8h	ADF	VEGFR2 pY996	10680.3
HIGH_SI113_IC30_8h	SI113	IC30	8h	ADF	VEGFR2 pY996	10749.3
HIGH_SI113_IC30_2h	SI113	IC30	2h	ADF	Vimentin	4507.67
HIGH_SI113_IC30_2h	SI113	IC30	2h	ADF	Vimentin	4876.33
HIGH_SI113_IC30_2h	SI113	IC30	2h	ADF	Vimentin	4474.67
HIGH_SI113_IC30_8h	SI113	IC30	8h	ADF	Vimentin	4233
HIGH_SI113_IC30_8h	SI113	IC30	8h	ADF	Vimentin	1636.33
HIGH_SI113_IC30_8h	SI113	IC30	8h	ADF	Vimentin	3663
HIGH_SI113_IC50_8h	SI113	IC50	8h	ADF	4E-BP1 pT3746	132716
HIGH_SI113_IC50_8h	SI113	IC50	8h	ADF	4E-BP1 pT3746	194432
HIGH_SI113_IC50_8h	SI113	IC50	8h	ADF	4E-BP1 pT3746	147952
HIGH_SI113_IC50_2h	SI113	IC50	2h	ADF	4E-BP1 pT3746	179543
HIGH_SI113_IC50_2h	SI113	IC50	2h	ADF	4E-BP1 pT3746	205337
HIGH_SI113_IC50_2h	SI113	IC50	2h	ADF	4E-BP1 pT3746	146093
HIGH_SI113_IC50_8h	SI113	IC50	8h	ADF	Ac-CoA Carboxylase pS79	44784
HIGH_SI113_IC50_8h	SI113	IC50	8h	ADF	Ac-CoA Carboxylase pS79	42579
HIGH_SI113_IC50_8h	SI113	IC50	8h	ADF	Ac-CoA Carboxylase pS79	42101.7
HIGH_SI113_IC50_2h	SI113	IC50	2h	ADF	Ac-CoA Carboxylase pS79	42331.7
HIGH_SI113_IC50_2h	SI113	IC50	2h	ADF	Ac-CoA Carboxylase pS79	36103.7
HIGH_SI113_IC50_2h	SI113	IC50	2h	ADF	Ac-CoA Carboxylase pS79	44177.3
HIGH_SI113_IC50_8h	SI113	IC50	8h	ADF	AKT pS473	4991.67
HIGH_SI113_IC50_8h	SI113	IC50	8h	ADF	AKT pS473	4547.67
HIGH_SI113_IC50_8h	SI113	IC50	8h	ADF	AKT pS473	7546.67
HIGH_SI113_IC50_2h	SI113	IC50	2h	ADF	AKT pS473	4835.67
HIGH_SI113_IC50_2h	SI113	IC50	2h	ADF	AKT pS473	8375.67
HIGH_SI113_IC50_2h	SI113	IC50	2h	ADF	AKT pS473	11767
HIGH_SI113_IC50_8h	SI113	IC50	8h	ADF	AKT pT308	3452
HIGH_SI113_IC50_8h	SI113	IC50	8h	ADF	AKT pT308	3517
HIGH_SI113_IC50_8h	SI113	IC50	8h	ADF	AKT pT308	3848.33
HIGH_SI113_IC50_2h	SI113	IC50	2h	ADF	AKT pT308	4073
HIGH_SI113_IC50_2h	SI113	IC50	2h	ADF	AKT pT308	3692.67
HIGH_SI113_IC50_2h	SI113	IC50	2h	ADF	AKT pT308	5115
HIGH_SI113_IC50_8h	SI113	IC50	8h	ADF	ALDH	42.8667
HIGH_SI113_IC50_8h	SI113	IC50	8h	ADF	ALDH	58.8667
HIGH_SI113_IC50_8h	SI113	IC50	8h	ADF	ALDH	55.2
HIGH_SI113_IC50_2h	SI113	IC50	2h	ADF	ALDH	41.6
HIGH_SI113_IC50_2h	SI113	IC50	2h	ADF	ALDH	25.45
HIGH_SI113_IC50_2h	SI113	IC50	2h	ADF	ALDH	49.6333
HIGH_SI113_IC50_8h	SI113	IC50	8h	ADF	ALK	9542.67
HIGH_SI113_IC50_8h	SI113	IC50	8h	ADF	ALK	11140
HIGH_SI113_IC50_8h	SI113	IC50	8h	ADF	ALK	9484
HIGH_SI113_IC50_2h	SI113	IC50	2h	ADF	ALK	11940.7
HIGH_SI113_IC50_2h	SI113	IC50	2h	ADF	ALK	4472
HIGH_SI113_IC50_2h	SI113	IC50	2h	ADF	ALK	8096
HIGH_SI113_IC50_8h	SI113	IC50	8h	ADF	AMPKa pS485	11078
HIGH_SI113_IC50_8h	SI113	IC50	8h	ADF	AMPKa pS485	12025.3
HIGH_SI113_IC50_8h	SI113	IC50	8h	ADF	AMPKa pS485	10248
HIGH_SI113_IC50_2h	SI113	IC50	2h	ADF	AMPKa pS485	16744
HIGH_SI113_IC50_2h	SI113	IC50	2h	ADF	AMPKa pS485	7386.33
HIGH_SI113_IC50_2h	SI113	IC50	2h	ADF	AMPKa pS485	10237.7
HIGH_SI113_IC50_8h	SI113	IC50	8h	ADF	AMPKa pT172	6015.67
HIGH_SI113_IC50_8h	SI113	IC50	8h	ADF	AMPKa pT172	5109.67
HIGH_SI113_IC50_8h	SI113	IC50	8h	ADF	AMPKa pT172	8301.33
HIGH_SI113_IC50_2h	SI113	IC50	2h	ADF	AMPKa pT172	1703
HIGH_SI113_IC50_2h	SI113	IC50	2h	ADF	AMPKa pT172	2239.33
HIGH_SI113_IC50_2h	SI113	IC50	2h	ADF	AMPKa pT172	2508
HIGH_SI113_IC50_8h	SI113	IC50	8h	ADF	AMPKb pS108	12561.7
HIGH_SI113_IC50_8h	SI113	IC50	8h	ADF	AMPKb pS108	10286.7
HIGH_SI113_IC50_8h	SI113	IC50	8h	ADF	AMPKb pS108	14341
HIGH_SI113_IC50_2h	SI113	IC50	2h	ADF	AMPKb pS108	8354
HIGH_SI113_IC50_2h	SI113	IC50	2h	ADF	AMPKb pS108	7412
HIGH_SI113_IC50_2h	SI113	IC50	2h	ADF	AMPKb pS108	14144.3
HIGH_SI113_IC50_8h	SI113	IC50	8h	ADF	AndrRec	1321
HIGH_SI113_IC50_8h	SI113	IC50	8h	ADF	AndrRec	1678.67
HIGH_SI113_IC50_8h	SI113	IC50	8h	ADF	AndrRec	1901
HIGH_SI113_IC50_2h	SI113	IC50	2h	ADF	AndrRec	1136.33
HIGH_SI113_IC50_2h	SI113	IC50	2h	ADF	AndrRec	1804.67
HIGH_SI113_IC50_2h	SI113	IC50	2h	ADF	AndrRec	2127.67
HIGH_SI113_IC50_8h	SI113	IC50	8h	ADF	ASK1 pS83	1345
HIGH_SI113_IC50_8h	SI113	IC50	8h	ADF	ASK1 pS83	1224.33
HIGH_SI113_IC50_8h	SI113	IC50	8h	ADF	ASK1 pS83	1349.33
HIGH_SI113_IC50_2h	SI113	IC50	2h	ADF	ASK1 pS83	1171.67
HIGH_SI113_IC50_2h	SI113	IC50	2h	ADF	ASK1 pS83	1501.33
HIGH_SI113_IC50_2h	SI113	IC50	2h	ADF	ASK1 pS83	1575.33
HIGH_SI113_IC50_8h	SI113	IC50	8h	ADF	ATP-Citrate Lyase pS454	34261.7
HIGH_SI113_IC50_8h	SI113	IC50	8h	ADF	ATP-Citrate Lyase pS454	27825.7
HIGH_SI113_IC50_8h	SI113	IC50	8h	ADF	ATP-Citrate Lyase pS454	37705.7
HIGH_SI113_IC50_2h	SI113	IC50	2h	ADF	ATP-Citrate Lyase pS454	31647.3
HIGH_SI113_IC50_2h	SI113	IC50	2h	ADF	ATP-Citrate Lyase pS454	28479.3
HIGH_SI113_IC50_2h	SI113	IC50	2h	ADF	ATP-Citrate Lyase pS454	42267.7
HIGH_SI113_IC50_8h	SI113	IC50	8h	ADF	BAD pS112	9252
HIGH_SI113_IC50_8h	SI113	IC50	8h	ADF	BAD pS112	8499.67
HIGH_SI113_IC50_8h	SI113	IC50	8h	ADF	BAD pS112	9629.33
HIGH_SI113_IC50_2h	SI113	IC50	2h	ADF	BAD pS112	7492
HIGH_SI113_IC50_2h	SI113	IC50	2h	ADF	BAD pS112	6178
HIGH_SI113_IC50_2h	SI113	IC50	2h	ADF	BAD pS112	8106.33
HIGH_SI113_IC50_8h	SI113	IC50	8h	ADF	BAD pS155	23615.3
HIGH_SI113_IC50_8h	SI113	IC50	8h	ADF	BAD pS155	21446.7
HIGH_SI113_IC50_8h	SI113	IC50	8h	ADF	BAD pS155	19903
HIGH_SI113_IC50_2h	SI113	IC50	2h	ADF	BAD pS155	15957.3
HIGH_SI113_IC50_2h	SI113	IC50	2h	ADF	BAD pS155	17815
HIGH_SI113_IC50_2h	SI113	IC50	2h	ADF	BAD pS155	20954
HIGH_SI113_IC50_8h	SI113	IC50	8h	ADF	b-Catenin pT41/pS45	8235.67
HIGH_SI113_IC50_8h	SI113	IC50	8h	ADF	b-Catenin pT41/pS45	7734.67
HIGH_SI113_IC50_8h	SI113	IC50	8h	ADF	b-Catenin pT41/pS45	9348.33
HIGH_SI113_IC50_2h	SI113	IC50	2h	ADF	b-Catenin pT41/pS45	7594
HIGH_SI113_IC50_2h	SI113	IC50	2h	ADF	b-Catenin pT41/pS45	6923
HIGH_SI113_IC50_2h	SI113	IC50	2h	ADF	b-Catenin pT41/pS45	10782
HIGH_SI113_IC50_8h	SI113	IC50	8h	ADF	c-ABL pT735	8667
HIGH_SI113_IC50_8h	SI113	IC50	8h	ADF	c-ABL pT735	7361
HIGH_SI113_IC50_8h	SI113	IC50	8h	ADF	c-ABL pT735	11598.7
HIGH_SI113_IC50_2h	SI113	IC50	2h	ADF	c-ABL pT735	9035
HIGH_SI113_IC50_2h	SI113	IC50	2h	ADF	c-ABL pT735	6613.67
HIGH_SI113_IC50_2h	SI113	IC50	2h	ADF	c-ABL pT735	11478.7
HIGH_SI113_IC50_8h	SI113	IC50	8h	ADF	c-ABL pY245	612.333
HIGH_SI113_IC50_8h	SI113	IC50	8h	ADF	c-ABL pY245	821.667
HIGH_SI113_IC50_8h	SI113	IC50	8h	ADF	c-ABL pY245	465.333
HIGH_SI113_IC50_2h	SI113	IC50	2h	ADF	c-ABL pY245	903
HIGH_SI113_IC50_2h	SI113	IC50	2h	ADF	c-ABL pY245	273
HIGH_SI113_IC50_2h	SI113	IC50	2h	ADF	c-ABL pY245	441.333
HIGH_SI113_IC50_8h	SI113	IC50	8h	ADF	c-Myc pS62	3992.67
HIGH_SI113_IC50_8h	SI113	IC50	8h	ADF	c-Myc pS62	3892.67
HIGH_SI113_IC50_8h	SI113	IC50	8h	ADF	c-Myc pS62	4021
HIGH_SI113_IC50_2h	SI113	IC50	2h	ADF	c-Myc pS62	5053
HIGH_SI113_IC50_2h	SI113	IC50	2h	ADF	c-Myc pS62	3827
HIGH_SI113_IC50_2h	SI113	IC50	2h	ADF	c-Myc pS62	4242.67
HIGH_SI113_IC50_8h	SI113	IC50	8h	ADF	Cyclin B1	21388
HIGH_SI113_IC50_8h	SI113	IC50	8h	ADF	Cyclin B1	21145
HIGH_SI113_IC50_8h	SI113	IC50	8h	ADF	Cyclin B1	23299.3
HIGH_SI113_IC50_2h	SI113	IC50	2h	ADF	Cyclin B1	27180.3
HIGH_SI113_IC50_2h	SI113	IC50	2h	ADF	Cyclin B1	24293.3
HIGH_SI113_IC50_2h	SI113	IC50	2h	ADF	Cyclin B1	30879
HIGH_SI113_IC50_8h	SI113	IC50	8h	ADF	Cyclin D1	13060.3
HIGH_SI113_IC50_8h	SI113	IC50	8h	ADF	Cyclin D1	23421.3
HIGH_SI113_IC50_8h	SI113	IC50	8h	ADF	Cyclin D1	9504.33
HIGH_SI113_IC50_2h	SI113	IC50	2h	ADF	Cyclin D1	20762.7
HIGH_SI113_IC50_2h	SI113	IC50	2h	ADF	Cyclin D1	8253.33
HIGH_SI113_IC50_2h	SI113	IC50	2h	ADF	Cyclin D1	10995
HIGH_SI113_IC50_8h	SI113	IC50	8h	ADF	EGFR pY1173	10535.7
HIGH_SI113_IC50_8h	SI113	IC50	8h	ADF	EGFR pY1173	7764.33
HIGH_SI113_IC50_8h	SI113	IC50	8h	ADF	EGFR pY1173	8003.33
HIGH_SI113_IC50_2h	SI113	IC50	2h	ADF	EGFR pY1173	22553.7
HIGH_SI113_IC50_2h	SI113	IC50	2h	ADF	EGFR pY1173	6664
HIGH_SI113_IC50_2h	SI113	IC50	2h	ADF	EGFR pY1173	8287.67
HIGH_SI113_IC50_8h	SI113	IC50	8h	ADF	EGFR pY845 MILK	167
HIGH_SI113_IC50_8h	SI113	IC50	8h	ADF	EGFR pY845 MILK	296
HIGH_SI113_IC50_8h	SI113	IC50	8h	ADF	EGFR pY845 MILK	146
HIGH_SI113_IC50_2h	SI113	IC50	2h	ADF	EGFR pY845 MILK	459
HIGH_SI113_IC50_2h	SI113	IC50	2h	ADF	EGFR pY845 MILK	190
HIGH_SI113_IC50_2h	SI113	IC50	2h	ADF	EGFR pY845 MILK	206.667
HIGH_SI113_IC50_8h	SI113	IC50	8h	ADF	ERG	39700
HIGH_SI113_IC50_8h	SI113	IC50	8h	ADF	ERG	59918
HIGH_SI113_IC50_8h	SI113	IC50	8h	ADF	ERG	30563
HIGH_SI113_IC50_2h	SI113	IC50	2h	ADF	ERG	50203.7
HIGH_SI113_IC50_2h	SI113	IC50	2h	ADF	ERG	22430.3
HIGH_SI113_IC50_2h	SI113	IC50	2h	ADF	ERG	31804
HIGH_SI113_IC50_8h	SI113	IC50	8h	ADF	Fatty Acid Synthase	12383.3
HIGH_SI113_IC50_8h	SI113	IC50	8h	ADF	Fatty Acid Synthase	10591.7
HIGH_SI113_IC50_8h	SI113	IC50	8h	ADF	Fatty Acid Synthase	10351
HIGH_SI113_IC50_2h	SI113	IC50	2h	ADF	Fatty Acid Synthase	9327.33
HIGH_SI113_IC50_2h	SI113	IC50	2h	ADF	Fatty Acid Synthase	5046.67
HIGH_SI113_IC50_2h	SI113	IC50	2h	ADF	Fatty Acid Synthase	11962
HIGH_SI113_IC50_8h	SI113	IC50	8h	ADF	Fodrin-a cl. D1185	7283.67
HIGH_SI113_IC50_8h	SI113	IC50	8h	ADF	Fodrin-a cl. D1185	10508
HIGH_SI113_IC50_8h	SI113	IC50	8h	ADF	Fodrin-a cl. D1185	7873.67
HIGH_SI113_IC50_2h	SI113	IC50	2h	ADF	Fodrin-a cl. D1185	10171.3
HIGH_SI113_IC50_2h	SI113	IC50	2h	ADF	Fodrin-a cl. D1185	8105.33
HIGH_SI113_IC50_2h	SI113	IC50	2h	ADF	Fodrin-a cl. D1185	10647.7
HIGH_SI113_IC50_8h	SI113	IC50	8h	ADF	FOXO1 pT24-FOXO3a pT32	5416
HIGH_SI113_IC50_8h	SI113	IC50	8h	ADF	FOXO1 pT24-FOXO3a pT32	4716.67
HIGH_SI113_IC50_8h	SI113	IC50	8h	ADF	FOXO1 pT24-FOXO3a pT32	6546
HIGH_SI113_IC50_2h	SI113	IC50	2h	ADF	FOXO1 pT24-FOXO3a pT32	4167.33
HIGH_SI113_IC50_2h	SI113	IC50	2h	ADF	FOXO1 pT24-FOXO3a pT32	6014.33
HIGH_SI113_IC50_2h	SI113	IC50	2h	ADF	FOXO1 pT24-FOXO3a pT32	6093.67
HIGH_SI113_IC50_8h	SI113	IC50	8h	ADF	GSK3ab pS21-9	14345.3
HIGH_SI113_IC50_8h	SI113	IC50	8h	ADF	GSK3ab pS21-9	10934
HIGH_SI113_IC50_8h	SI113	IC50	8h	ADF	GSK3ab pS21-9	16223
HIGH_SI113_IC50_2h	SI113	IC50	2h	ADF	GSK3ab pS21-9	9904.33
HIGH_SI113_IC50_2h	SI113	IC50	2h	ADF	GSK3ab pS21-9	15725.7
HIGH_SI113_IC50_2h	SI113	IC50	2h	ADF	GSK3ab pS21-9	23264.7
HIGH_SI113_IC50_8h	SI113	IC50	8h	ADF	GSK3-a/b pS279	41320
HIGH_SI113_IC50_8h	SI113	IC50	8h	ADF	GSK3-a/b pS279	38977
HIGH_SI113_IC50_8h	SI113	IC50	8h	ADF	GSK3-a/b pS279	44326
HIGH_SI113_IC50_2h	SI113	IC50	2h	ADF	GSK3-a/b pS279	22332.7
HIGH_SI113_IC50_2h	SI113	IC50	2h	ADF	GSK3-a/b pS279	36341.3
HIGH_SI113_IC50_2h	SI113	IC50	2h	ADF	GSK3-a/b pS279	41605
HIGH_SI113_IC50_8h	SI113	IC50	8h	ADF	GSK3b pS9	20818.7
HIGH_SI113_IC50_8h	SI113	IC50	8h	ADF	GSK3b pS9	18837.3
HIGH_SI113_IC50_8h	SI113	IC50	8h	ADF	GSK3b pS9	23689.3
HIGH_SI113_IC50_2h	SI113	IC50	2h	ADF	GSK3b pS9	19405.3
HIGH_SI113_IC50_2h	SI113	IC50	2h	ADF	GSK3b pS9	24026.3
HIGH_SI113_IC50_2h	SI113	IC50	2h	ADF	GSK3b pS9	35339
HIGH_SI113_IC50_8h	SI113	IC50	8h	ADF	H3-Histone pS10	27399.7
HIGH_SI113_IC50_8h	SI113	IC50	8h	ADF	H3-Histone pS10	19316.3
HIGH_SI113_IC50_8h	SI113	IC50	8h	ADF	H3-Histone pS10	30404.3
HIGH_SI113_IC50_2h	SI113	IC50	2h	ADF	H3-Histone pS10	26728.7
HIGH_SI113_IC50_2h	SI113	IC50	2h	ADF	H3-Histone pS10	22552.3
HIGH_SI113_IC50_2h	SI113	IC50	2h	ADF	H3-Histone pS10	59039.7
HIGH_SI113_IC50_8h	SI113	IC50	8h	ADF	IRS-1 pS612	3044.67
HIGH_SI113_IC50_8h	SI113	IC50	8h	ADF	IRS-1 pS612	2521.33
HIGH_SI113_IC50_8h	SI113	IC50	8h	ADF	IRS-1 pS612	3725
HIGH_SI113_IC50_2h	SI113	IC50	2h	ADF	IRS-1 pS612	1612
HIGH_SI113_IC50_2h	SI113	IC50	2h	ADF	IRS-1 pS612	2609
HIGH_SI113_IC50_2h	SI113	IC50	2h	ADF	IRS-1 pS612	3217
HIGH_SI113_IC50_8h	SI113	IC50	8h	ADF	p27_Kip1	2175.33
HIGH_SI113_IC50_8h	SI113	IC50	8h	ADF	p27_Kip1	2328
HIGH_SI113_IC50_8h	SI113	IC50	8h	ADF	p27_Kip1	3048.33
HIGH_SI113_IC50_2h	SI113	IC50	2h	ADF	p27_Kip1	1779
HIGH_SI113_IC50_2h	SI113	IC50	2h	ADF	p27_Kip1	2283
HIGH_SI113_IC50_2h	SI113	IC50	2h	ADF	p27_Kip1	3147
HIGH_SI113_IC50_8h	SI113	IC50	8h	ADF	LKB1 pS334	40243.3
HIGH_SI113_IC50_8h	SI113	IC50	8h	ADF	LKB1 pS334	42306.7
HIGH_SI113_IC50_8h	SI113	IC50	8h	ADF	LKB1 pS334	42600
HIGH_SI113_IC50_2h	SI113	IC50	2h	ADF	LKB1 pS334	43570.7
HIGH_SI113_IC50_2h	SI113	IC50	2h	ADF	LKB1 pS334	39499
HIGH_SI113_IC50_2h	SI113	IC50	2h	ADF	LKB1 pS334	45095
HIGH_SI113_IC50_8h	SI113	IC50	8h	ADF	MDM2 pS166	4253
HIGH_SI113_IC50_8h	SI113	IC50	8h	ADF	MDM2 pS166	4031.33
HIGH_SI113_IC50_8h	SI113	IC50	8h	ADF	MDM2 pS166	4699.67
HIGH_SI113_IC50_2h	SI113	IC50	2h	ADF	MDM2 pS166	2673.67
HIGH_SI113_IC50_2h	SI113	IC50	2h	ADF	MDM2 pS166	3809.33
HIGH_SI113_IC50_2h	SI113	IC50	2h	ADF	MDM2 pS166	4642.33
HIGH_SI113_IC50_8h	SI113	IC50	8h	ADF	MEK1-2 pS217-21	66112
HIGH_SI113_IC50_8h	SI113	IC50	8h	ADF	MEK1-2 pS217-21	66776.7
HIGH_SI113_IC50_8h	SI113	IC50	8h	ADF	MEK1-2 pS217-21	72996.7
HIGH_SI113_IC50_2h	SI113	IC50	2h	ADF	MEK1-2 pS217-21	73755.7
HIGH_SI113_IC50_2h	SI113	IC50	2h	ADF	MEK1-2 pS217-21	47592.3
HIGH_SI113_IC50_2h	SI113	IC50	2h	ADF	MEK1-2 pS217-21	90399.7
HIGH_SI113_IC50_8h	SI113	IC50	8h	ADF	MKK4 pS80	8385.33
HIGH_SI113_IC50_8h	SI113	IC50	8h	ADF	MKK4 pS80	14415.7
HIGH_SI113_IC50_8h	SI113	IC50	8h	ADF	MKK4 pS80	5327.67
HIGH_SI113_IC50_2h	SI113	IC50	2h	ADF	MKK4 pS80	17907
HIGH_SI113_IC50_2h	SI113	IC50	2h	ADF	MKK4 pS80	4833.33
HIGH_SI113_IC50_2h	SI113	IC50	2h	ADF	MKK4 pS80	5273.67
HIGH_SI113_IC50_8h	SI113	IC50	8h	ADF	MSK1 pS360	4451.33
HIGH_SI113_IC50_8h	SI113	IC50	8h	ADF	MSK1 pS360	4941
HIGH_SI113_IC50_8h	SI113	IC50	8h	ADF	MSK1 pS360	5182
HIGH_SI113_IC50_2h	SI113	IC50	2h	ADF	MSK1 pS360	5404.33
HIGH_SI113_IC50_2h	SI113	IC50	2h	ADF	MSK1 pS360	4220.67
HIGH_SI113_IC50_2h	SI113	IC50	2h	ADF	MSK1 pS360	5229.67
HIGH_SI113_IC50_8h	SI113	IC50	8h	ADF	mTOR pS2448	16643.3
HIGH_SI113_IC50_8h	SI113	IC50	8h	ADF	mTOR pS2448	17522.7
HIGH_SI113_IC50_8h	SI113	IC50	8h	ADF	mTOR pS2448	16357.7
HIGH_SI113_IC50_2h	SI113	IC50	2h	ADF	mTOR pS2448	6434.67
HIGH_SI113_IC50_2h	SI113	IC50	2h	ADF	mTOR pS2448	11100.7
HIGH_SI113_IC50_2h	SI113	IC50	2h	ADF	mTOR pS2448	14655.3
HIGH_SI113_IC50_8h	SI113	IC50	8h	ADF	mTOR pS2481	9266.67
HIGH_SI113_IC50_8h	SI113	IC50	8h	ADF	mTOR pS2481	8336.33
HIGH_SI113_IC50_8h	SI113	IC50	8h	ADF	mTOR pS2481	11458
HIGH_SI113_IC50_2h	SI113	IC50	2h	ADF	mTOR pS2481	9526
HIGH_SI113_IC50_2h	SI113	IC50	2h	ADF	mTOR pS2481	7463.33
HIGH_SI113_IC50_2h	SI113	IC50	2h	ADF	mTOR pS2481	12310
HIGH_SI113_IC50_8h	SI113	IC50	8h	ADF	NDRG1 pT346	72740
HIGH_SI113_IC50_8h	SI113	IC50	8h	ADF	NDRG1 pT346	73183.3
HIGH_SI113_IC50_8h	SI113	IC50	8h	ADF	NDRG1 pT346	71140
HIGH_SI113_IC50_2h	SI113	IC50	2h	ADF	NDRG1 pT346	59397
HIGH_SI113_IC50_2h	SI113	IC50	2h	ADF	NDRG1 pT346	53198.3
HIGH_SI113_IC50_2h	SI113	IC50	2h	ADF	NDRG1 pT346	64370.3
HIGH_SI113_IC50_8h	SI113	IC50	8h	ADF	NDRG1_pS330	23343
HIGH_SI113_IC50_8h	SI113	IC50	8h	ADF	NDRG1_pS330	26519
HIGH_SI113_IC50_8h	SI113	IC50	8h	ADF	NDRG1_pS330	19602.7
HIGH_SI113_IC50_2h	SI113	IC50	2h	ADF	NDRG1_pS330	31676.7
HIGH_SI113_IC50_2h	SI113	IC50	2h	ADF	NDRG1_pS330	19356
HIGH_SI113_IC50_2h	SI113	IC50	2h	ADF	NDRG1_pS330	25182.7
HIGH_SI113_IC50_8h	SI113	IC50	8h	ADF	NDRG1_pS330	18920
HIGH_SI113_IC50_8h	SI113	IC50	8h	ADF	NDRG1_pS330	21920.7
HIGH_SI113_IC50_8h	SI113	IC50	8h	ADF	NDRG1_pS330	15885
HIGH_SI113_IC50_2h	SI113	IC50	2h	ADF	NDRG1_pS330	25918.3
HIGH_SI113_IC50_2h	SI113	IC50	2h	ADF	NDRG1_pS330	15523
HIGH_SI113_IC50_2h	SI113	IC50	2h	ADF	NDRG1_pS330	21071.3
HIGH_SI113_IC50_8h	SI113	IC50	8h	ADF	p16_INK4A	2002.33
HIGH_SI113_IC50_8h	SI113	IC50	8h	ADF	p16_INK4A	2244.33
HIGH_SI113_IC50_8h	SI113	IC50	8h	ADF	p16_INK4A	1869.33
HIGH_SI113_IC50_2h	SI113	IC50	2h	ADF	p16_INK4A	2690.33
HIGH_SI113_IC50_2h	SI113	IC50	2h	ADF	p16_INK4A	1975
HIGH_SI113_IC50_2h	SI113	IC50	2h	ADF	p16_INK4A	1939.67
HIGH_SI113_IC50_8h	SI113	IC50	8h	ADF	p21_Waf1/Cip1	753.333
HIGH_SI113_IC50_8h	SI113	IC50	8h	ADF	p21_Waf1/Cip1	891.667
HIGH_SI113_IC50_8h	SI113	IC50	8h	ADF	p21_Waf1/Cip1	527.333
HIGH_SI113_IC50_2h	SI113	IC50	2h	ADF	p21_Waf1/Cip1	821.667
HIGH_SI113_IC50_2h	SI113	IC50	2h	ADF	p21_Waf1/Cip1	334
HIGH_SI113_IC50_2h	SI113	IC50	2h	ADF	p21_Waf1/Cip1	454
HIGH_SI113_IC50_8h	SI113	IC50	8h	ADF	p70S6K pS371	4584.67
HIGH_SI113_IC50_8h	SI113	IC50	8h	ADF	p70S6K pS371	3964.67
HIGH_SI113_IC50_8h	SI113	IC50	8h	ADF	p70S6K pS371	5199
HIGH_SI113_IC50_2h	SI113	IC50	2h	ADF	p70S6K pS371	2407
HIGH_SI113_IC50_2h	SI113	IC50	2h	ADF	p70S6K pS371	4000
HIGH_SI113_IC50_2h	SI113	IC50	2h	ADF	p70S6K pS371	4839.33
HIGH_SI113_IC50_8h	SI113	IC50	8h	ADF	p90RSK pS380	5332.33
HIGH_SI113_IC50_8h	SI113	IC50	8h	ADF	p90RSK pS380	5132.33
HIGH_SI113_IC50_8h	SI113	IC50	8h	ADF	p90RSK pS380	6417.67
HIGH_SI113_IC50_2h	SI113	IC50	2h	ADF	p90RSK pS380	3630
HIGH_SI113_IC50_2h	SI113	IC50	2h	ADF	p90RSK pS380	4766.33
HIGH_SI113_IC50_2h	SI113	IC50	2h	ADF	p90RSK pS380	6488
HIGH_SI113_IC50_8h	SI113	IC50	8h	ADF	PARP D214	1898
HIGH_SI113_IC50_8h	SI113	IC50	8h	ADF	PARP D214	1950.33
HIGH_SI113_IC50_8h	SI113	IC50	8h	ADF	PARP D214	2030.67
HIGH_SI113_IC50_2h	SI113	IC50	2h	ADF	PARP D214	2115.33
HIGH_SI113_IC50_2h	SI113	IC50	2h	ADF	PARP D214	1741
HIGH_SI113_IC50_2h	SI113	IC50	2h	ADF	PARP D214	2359.33
HIGH_SI113_IC50_8h	SI113	IC50	8h	ADF	PDGFR-b pY751	3622.33
HIGH_SI113_IC50_8h	SI113	IC50	8h	ADF	PDGFR-b pY751	3804
HIGH_SI113_IC50_8h	SI113	IC50	8h	ADF	PDGFR-b pY751	3621.33
HIGH_SI113_IC50_2h	SI113	IC50	2h	ADF	PDGFR-b pY751	2357.67
HIGH_SI113_IC50_2h	SI113	IC50	2h	ADF	PDGFR-b pY751	3336.33
HIGH_SI113_IC50_2h	SI113	IC50	2h	ADF	PDGFR-b pY751	3334
HIGH_SI113_IC50_8h	SI113	IC50	8h	ADF	PRAS40 pT246	14641.7
HIGH_SI113_IC50_8h	SI113	IC50	8h	ADF	PRAS40 pT246	14415.7
HIGH_SI113_IC50_8h	SI113	IC50	8h	ADF	PRAS40 pT246	11668.7
HIGH_SI113_IC50_2h	SI113	IC50	2h	ADF	PRAS40 pT246	10822
HIGH_SI113_IC50_2h	SI113	IC50	2h	ADF	PRAS40 pT246	6758.33
HIGH_SI113_IC50_2h	SI113	IC50	2h	ADF	PRAS40 pT246	11811.7
HIGH_SI113_IC50_8h	SI113	IC50	8h	ADF	ProgR pS190	880.333
HIGH_SI113_IC50_8h	SI113	IC50	8h	ADF	ProgR pS190	853.333
HIGH_SI113_IC50_8h	SI113	IC50	8h	ADF	ProgR pS190	920.333
HIGH_SI113_IC50_2h	SI113	IC50	2h	ADF	ProgR pS190	489.333
HIGH_SI113_IC50_2h	SI113	IC50	2h	ADF	ProgR pS190	828
HIGH_SI113_IC50_2h	SI113	IC50	2h	ADF	ProgR pS190	914.667
HIGH_SI113_IC50_8h	SI113	IC50	8h	ADF	S6RP pS235-236	5508.33
HIGH_SI113_IC50_8h	SI113	IC50	8h	ADF	S6RP pS235-236	4105
HIGH_SI113_IC50_8h	SI113	IC50	8h	ADF	S6RP pS235-236	9306.67
HIGH_SI113_IC50_2h	SI113	IC50	2h	ADF	S6RP pS235-236	1415.33
HIGH_SI113_IC50_2h	SI113	IC50	2h	ADF	S6RP pS235-236	882
HIGH_SI113_IC50_2h	SI113	IC50	2h	ADF	S6RP pS235-236	4517
HIGH_SI113_IC50_8h	SI113	IC50	8h	ADF	S6RP pS240-244	6151
HIGH_SI113_IC50_8h	SI113	IC50	8h	ADF	S6RP pS240-244	4401.33
HIGH_SI113_IC50_8h	SI113	IC50	8h	ADF	S6RP pS240-244	3937.5
HIGH_SI113_IC50_2h	SI113	IC50	2h	ADF	S6RP pS240-244	2148
HIGH_SI113_IC50_2h	SI113	IC50	2h	ADF	S6RP pS240-244	2300
HIGH_SI113_IC50_2h	SI113	IC50	2h	ADF	S6RP pS240-244	2126.5
HIGH_SI113_IC50_8h	SI113	IC50	8h	ADF	SAP-JNK pT183-Y185	16208.3
HIGH_SI113_IC50_8h	SI113	IC50	8h	ADF	SAP-JNK pT183-Y185	15605.7
HIGH_SI113_IC50_8h	SI113	IC50	8h	ADF	SAP-JNK pT183-Y185	29265
HIGH_SI113_IC50_2h	SI113	IC50	2h	ADF	SAP-JNK pT183-Y185	12692.3
HIGH_SI113_IC50_2h	SI113	IC50	2h	ADF	SAP-JNK pT183-Y185	18626.3
HIGH_SI113_IC50_2h	SI113	IC50	2h	ADF	SAP-JNK pT183-Y185	21168
HIGH_SI113_IC50_8h	SI113	IC50	8h	ADF	SGK pS422	30455.7
HIGH_SI113_IC50_8h	SI113	IC50	8h	ADF	SGK pS422	28414.3
HIGH_SI113_IC50_8h	SI113	IC50	8h	ADF	SGK pS422	38795.7
HIGH_SI113_IC50_2h	SI113	IC50	2h	ADF	SGK pS422	19901.3
HIGH_SI113_IC50_2h	SI113	IC50	2h	ADF	SGK pS422	28240.7
HIGH_SI113_IC50_2h	SI113	IC50	2h	ADF	SGK pS422	34755
HIGH_SI113_IC50_8h	SI113	IC50	8h	ADF	SGK3	9273.67
HIGH_SI113_IC50_8h	SI113	IC50	8h	ADF	SGK3	8792.33
HIGH_SI113_IC50_8h	SI113	IC50	8h	ADF	SGK3	9487
HIGH_SI113_IC50_2h	SI113	IC50	2h	ADF	SGK3	7816.33
HIGH_SI113_IC50_2h	SI113	IC50	2h	ADF	SGK3	8086.67
HIGH_SI113_IC50_2h	SI113	IC50	2h	ADF	SGK3	10997.3
HIGH_SI113_IC50_8h	SI113	IC50	8h	ADF	SMAD1-5-8 pS-S-S	28288.3
HIGH_SI113_IC50_8h	SI113	IC50	8h	ADF	SMAD1-5-8 pS-S-S	33972
HIGH_SI113_IC50_8h	SI113	IC50	8h	ADF	SMAD1-5-8 pS-S-S	30394
HIGH_SI113_IC50_2h	SI113	IC50	2h	ADF	SMAD1-5-8 pS-S-S	44162
HIGH_SI113_IC50_2h	SI113	IC50	2h	ADF	SMAD1-5-8 pS-S-S	42524.7
HIGH_SI113_IC50_2h	SI113	IC50	2h	ADF	SMAD1-5-8 pS-S-S	51233.7
HIGH_SI113_IC50_8h	SI113	IC50	8h	ADF	SMAD2 pS465-67	19384
HIGH_SI113_IC50_8h	SI113	IC50	8h	ADF	SMAD2 pS465-67	17879
HIGH_SI113_IC50_8h	SI113	IC50	8h	ADF	SMAD2 pS465-67	25125.3
HIGH_SI113_IC50_2h	SI113	IC50	2h	ADF	SMAD2 pS465-67	22324
HIGH_SI113_IC50_2h	SI113	IC50	2h	ADF	SMAD2 pS465-67	11772.7
HIGH_SI113_IC50_2h	SI113	IC50	2h	ADF	SMAD2 pS465-67	21599.3
HIGH_SI113_IC50_8h	SI113	IC50	8h	ADF	SRC Family pY416	2774
HIGH_SI113_IC50_8h	SI113	IC50	8h	ADF	SRC Family pY416	2616.33
HIGH_SI113_IC50_8h	SI113	IC50	8h	ADF	SRC Family pY416	3333.33
HIGH_SI113_IC50_2h	SI113	IC50	2h	ADF	SRC Family pY416	2257.33
HIGH_SI113_IC50_2h	SI113	IC50	2h	ADF	SRC Family pY416	2728.67
HIGH_SI113_IC50_2h	SI113	IC50	2h	ADF	SRC Family pY416	3224.67
HIGH_SI113_IC50_8h	SI113	IC50	8h	ADF	STAT3 pS727	19685.7
HIGH_SI113_IC50_8h	SI113	IC50	8h	ADF	STAT3 pS727	19261
HIGH_SI113_IC50_8h	SI113	IC50	8h	ADF	STAT3 pS727	24611.7
HIGH_SI113_IC50_2h	SI113	IC50	2h	ADF	STAT3 pS727	15572
HIGH_SI113_IC50_2h	SI113	IC50	2h	ADF	STAT3 pS727	19436
HIGH_SI113_IC50_2h	SI113	IC50	2h	ADF	STAT3 pS727	27008.7
HIGH_SI113_IC50_8h	SI113	IC50	8h	ADF	STAT3 pY705	4328
HIGH_SI113_IC50_8h	SI113	IC50	8h	ADF	STAT3 pY705	9772.67
HIGH_SI113_IC50_8h	SI113	IC50	8h	ADF	STAT3 pY705	1289.33
HIGH_SI113_IC50_2h	SI113	IC50	2h	ADF	STAT3 pY705	12208.7
HIGH_SI113_IC50_2h	SI113	IC50	2h	ADF	STAT3 pY705	997.333
HIGH_SI113_IC50_2h	SI113	IC50	2h	ADF	STAT3 pY705	959.333
HIGH_SI113_IC50_8h	SI113	IC50	8h	ADF	STAT5 pY694	3125
HIGH_SI113_IC50_8h	SI113	IC50	8h	ADF	STAT5 pY694	4758.67
HIGH_SI113_IC50_8h	SI113	IC50	8h	ADF	STAT5 pY694	2426
HIGH_SI113_IC50_2h	SI113	IC50	2h	ADF	STAT5 pY694	6595.33
HIGH_SI113_IC50_2h	SI113	IC50	2h	ADF	STAT5 pY694	1677.67
HIGH_SI113_IC50_2h	SI113	IC50	2h	ADF	STAT5 pY694	1892
HIGH_SI113_IC50_8h	SI113	IC50	8h	ADF	Tuberin pY1571	9202.67
HIGH_SI113_IC50_8h	SI113	IC50	8h	ADF	Tuberin pY1571	8780
HIGH_SI113_IC50_8h	SI113	IC50	8h	ADF	Tuberin pY1571	10668.3
HIGH_SI113_IC50_2h	SI113	IC50	2h	ADF	Tuberin pY1571	9355.33
HIGH_SI113_IC50_2h	SI113	IC50	2h	ADF	Tuberin pY1571	11121.3
HIGH_SI113_IC50_2h	SI113	IC50	2h	ADF	Tuberin pY1571	11072.3
HIGH_SI113_IC50_8h	SI113	IC50	8h	ADF	VEGFR2 pY996	6548.67
HIGH_SI113_IC50_8h	SI113	IC50	8h	ADF	VEGFR2 pY996	7990.67
HIGH_SI113_IC50_8h	SI113	IC50	8h	ADF	VEGFR2 pY996	7111.67
HIGH_SI113_IC50_2h	SI113	IC50	2h	ADF	VEGFR2 pY996	9482.67
HIGH_SI113_IC50_2h	SI113	IC50	2h	ADF	VEGFR2 pY996	5264
HIGH_SI113_IC50_2h	SI113	IC50	2h	ADF	VEGFR2 pY996	7053
HIGH_SI113_IC50_8h	SI113	IC50	8h	ADF	Vimentin	4892
HIGH_SI113_IC50_8h	SI113	IC50	8h	ADF	Vimentin	6578.33
HIGH_SI113_IC50_8h	SI113	IC50	8h	ADF	Vimentin	4961.67
HIGH_SI113_IC50_2h	SI113	IC50	2h	ADF	Vimentin	6534.67
HIGH_SI113_IC50_2h	SI113	IC50	2h	ADF	Vimentin	3054.67
HIGH_SI113_IC50_2h	SI113	IC50	2h	ADF	Vimentin	5905.33
CTRL_2h	CTRL	0	2h	GBM3-LUC	4E-BP1 pT3746	147507
CTRL_2h	CTRL	0	2h	GBM3-LUC	4E-BP1 pT3746	147581
CTRL_2h	CTRL	0	2h	GBM3-LUC	4E-BP1 pT3746	169674
CTRL_8h	CTRL	0	8h	GBM3-LUC	4E-BP1 pT3746	196128
CTRL_8h	CTRL	0	8h	GBM3-LUC	4E-BP1 pT3746	124310
CTRL_8h	CTRL	0	8h	GBM3-LUC	4E-BP1 pT3746	147345
CTRL_2h	CTRL	0	2h	GBM3-LUC	Ac-CoA Carboxylase pS79	44201.7
CTRL_2h	CTRL	0	2h	GBM3-LUC	Ac-CoA Carboxylase pS79	46980.3
CTRL_2h	CTRL	0	2h	GBM3-LUC	Ac-CoA Carboxylase pS79	50293.3
CTRL_8h	CTRL	0	8h	GBM3-LUC	Ac-CoA Carboxylase pS79	50494
CTRL_8h	CTRL	0	8h	GBM3-LUC	Ac-CoA Carboxylase pS79	41111
CTRL_8h	CTRL	0	8h	GBM3-LUC	Ac-CoA Carboxylase pS79	40075
CTRL_2h	CTRL	0	2h	GBM3-LUC	AKT pS473	121486
CTRL_2h	CTRL	0	2h	GBM3-LUC	AKT pS473	103238
CTRL_2h	CTRL	0	2h	GBM3-LUC	AKT pS473	169031
CTRL_8h	CTRL	0	8h	GBM3-LUC	AKT pS473	37991.7
CTRL_8h	CTRL	0	8h	GBM3-LUC	AKT pS473	67559.7
CTRL_8h	CTRL	0	8h	GBM3-LUC	AKT pS473	84087.3
CTRL_2h	CTRL	0	2h	GBM3-LUC	AKT pT308	44909.3
CTRL_2h	CTRL	0	2h	GBM3-LUC	AKT pT308	34001.3
CTRL_2h	CTRL	0	2h	GBM3-LUC	AKT pT308	46124.7
CTRL_8h	CTRL	0	8h	GBM3-LUC	AKT pT308	12396.3
CTRL_8h	CTRL	0	8h	GBM3-LUC	AKT pT308	22920.3
CTRL_8h	CTRL	0	8h	GBM3-LUC	AKT pT308	27431.7
CTRL_2h	CTRL	0	2h	GBM3-LUC	ALDH	238
CTRL_2h	CTRL	0	2h	GBM3-LUC	ALDH	348.333
CTRL_2h	CTRL	0	2h	GBM3-LUC	ALDH	294.333
CTRL_8h	CTRL	0	8h	GBM3-LUC	ALDH	271.333
CTRL_8h	CTRL	0	8h	GBM3-LUC	ALDH	236.667
CTRL_8h	CTRL	0	8h	GBM3-LUC	ALDH	240.333
CTRL_2h	CTRL	0	2h	GBM3-LUC	ALK	48807
CTRL_2h	CTRL	0	2h	GBM3-LUC	ALK	46258.7
CTRL_2h	CTRL	0	2h	GBM3-LUC	ALK	43187
CTRL_8h	CTRL	0	8h	GBM3-LUC	ALK	47962.3
CTRL_8h	CTRL	0	8h	GBM3-LUC	ALK	46352.3
CTRL_8h	CTRL	0	8h	GBM3-LUC	ALK	49058.7
CTRL_2h	CTRL	0	2h	GBM3-LUC	AMPKa pS485	14454
CTRL_2h	CTRL	0	2h	GBM3-LUC	AMPKa pS485	15473
CTRL_2h	CTRL	0	2h	GBM3-LUC	AMPKa pS485	14367.3
CTRL_8h	CTRL	0	8h	GBM3-LUC	AMPKa pS485	16055.3
CTRL_8h	CTRL	0	8h	GBM3-LUC	AMPKa pS485	20136.3
CTRL_8h	CTRL	0	8h	GBM3-LUC	AMPKa pS485	15802.7
CTRL_2h	CTRL	0	2h	GBM3-LUC	AMPKa pT172	10293.7
CTRL_2h	CTRL	0	2h	GBM3-LUC	AMPKa pT172	6377.33
CTRL_2h	CTRL	0	2h	GBM3-LUC	AMPKa pT172	9801.67
CTRL_8h	CTRL	0	8h	GBM3-LUC	AMPKa pT172	6342
CTRL_8h	CTRL	0	8h	GBM3-LUC	AMPKa pT172	7778.33
CTRL_8h	CTRL	0	8h	GBM3-LUC	AMPKa pT172	8810
CTRL_2h	CTRL	0	2h	GBM3-LUC	AMPKb pS108	3795.67
CTRL_2h	CTRL	0	2h	GBM3-LUC	AMPKb pS108	3218.67
CTRL_2h	CTRL	0	2h	GBM3-LUC	AMPKb pS108	2826.67
CTRL_8h	CTRL	0	8h	GBM3-LUC	AMPKb pS108	4750.67
CTRL_8h	CTRL	0	8h	GBM3-LUC	AMPKb pS108	7321
CTRL_8h	CTRL	0	8h	GBM3-LUC	AMPKb pS108	3499.67
CTRL_2h	CTRL	0	2h	GBM3-LUC	AndrRec	1855
CTRL_2h	CTRL	0	2h	GBM3-LUC	AndrRec	1852.67
CTRL_2h	CTRL	0	2h	GBM3-LUC	AndrRec	1198
CTRL_8h	CTRL	0	8h	GBM3-LUC	AndrRec	1838
CTRL_8h	CTRL	0	8h	GBM3-LUC	AndrRec	2210
CTRL_8h	CTRL	0	8h	GBM3-LUC	AndrRec	1989
CTRL_2h	CTRL	0	2h	GBM3-LUC	ASK1 pS83	1873
CTRL_2h	CTRL	0	2h	GBM3-LUC	ASK1 pS83	1763
CTRL_2h	CTRL	0	2h	GBM3-LUC	ASK1 pS83	1799.67
CTRL_8h	CTRL	0	8h	GBM3-LUC	ASK1 pS83	2766.67
CTRL_8h	CTRL	0	8h	GBM3-LUC	ASK1 pS83	2668.67
CTRL_8h	CTRL	0	8h	GBM3-LUC	ASK1 pS83	1894
CTRL_2h	CTRL	0	2h	GBM3-LUC	ATP-Citrate Lyase pS454	75246
CTRL_2h	CTRL	0	2h	GBM3-LUC	ATP-Citrate Lyase pS454	89751
CTRL_2h	CTRL	0	2h	GBM3-LUC	ATP-Citrate Lyase pS454	107369
CTRL_8h	CTRL	0	8h	GBM3-LUC	ATP-Citrate Lyase pS454	118903
CTRL_8h	CTRL	0	8h	GBM3-LUC	ATP-Citrate Lyase pS454	86231.7
CTRL_8h	CTRL	0	8h	GBM3-LUC	ATP-Citrate Lyase pS454	79379.7
CTRL_2h	CTRL	0	2h	GBM3-LUC	BAD pS112	24426.3
CTRL_2h	CTRL	0	2h	GBM3-LUC	BAD pS112	29074.3
CTRL_2h	CTRL	0	2h	GBM3-LUC	BAD pS112	29952.3
CTRL_8h	CTRL	0	8h	GBM3-LUC	BAD pS112	19138.3
CTRL_8h	CTRL	0	8h	GBM3-LUC	BAD pS112	21494
CTRL_8h	CTRL	0	8h	GBM3-LUC	BAD pS112	18707.7
CTRL_2h	CTRL	0	2h	GBM3-LUC	BAD pS155	22360.3
CTRL_2h	CTRL	0	2h	GBM3-LUC	BAD pS155	21046
CTRL_2h	CTRL	0	2h	GBM3-LUC	BAD pS155	18209
CTRL_8h	CTRL	0	8h	GBM3-LUC	BAD pS155	24092
CTRL_8h	CTRL	0	8h	GBM3-LUC	BAD pS155	23089.3
CTRL_8h	CTRL	0	8h	GBM3-LUC	BAD pS155	22335
CTRL_2h	CTRL	0	2h	GBM3-LUC	b-Catenin pT41/pS45	6695
CTRL_2h	CTRL	0	2h	GBM3-LUC	b-Catenin pT41/pS45	7162.33
CTRL_2h	CTRL	0	2h	GBM3-LUC	b-Catenin pT41/pS45	7575.33
CTRL_8h	CTRL	0	8h	GBM3-LUC	b-Catenin pT41/pS45	9538
CTRL_8h	CTRL	0	8h	GBM3-LUC	b-Catenin pT41/pS45	12071
CTRL_8h	CTRL	0	8h	GBM3-LUC	b-Catenin pT41/pS45	10755.7
CTRL_2h	CTRL	0	2h	GBM3-LUC	c-ABL pT735	16355
CTRL_2h	CTRL	0	2h	GBM3-LUC	c-ABL pT735	13092.3
CTRL_2h	CTRL	0	2h	GBM3-LUC	c-ABL pT735	14110
CTRL_8h	CTRL	0	8h	GBM3-LUC	c-ABL pT735	9756.33
CTRL_8h	CTRL	0	8h	GBM3-LUC	c-ABL pT735	12859.3
CTRL_8h	CTRL	0	8h	GBM3-LUC	c-ABL pT735	12548
CTRL_2h	CTRL	0	2h	GBM3-LUC	c-ABL pY245	922.667
CTRL_2h	CTRL	0	2h	GBM3-LUC	c-ABL pY245	865.667
CTRL_2h	CTRL	0	2h	GBM3-LUC	c-ABL pY245	862
CTRL_8h	CTRL	0	8h	GBM3-LUC	c-ABL pY245	1193
CTRL_8h	CTRL	0	8h	GBM3-LUC	c-ABL pY245	950.333
CTRL_8h	CTRL	0	8h	GBM3-LUC	c-ABL pY245	813
CTRL_2h	CTRL	0	2h	GBM3-LUC	c-Myc pS62	1305.67
CTRL_2h	CTRL	0	2h	GBM3-LUC	c-Myc pS62	1385
CTRL_2h	CTRL	0	2h	GBM3-LUC	c-Myc pS62	1345
CTRL_8h	CTRL	0	8h	GBM3-LUC	c-Myc pS62	1419.33
CTRL_8h	CTRL	0	8h	GBM3-LUC	c-Myc pS62	1681
CTRL_8h	CTRL	0	8h	GBM3-LUC	c-Myc pS62	1431.67
CTRL_2h	CTRL	0	2h	GBM3-LUC	Cyclin B1	19807
CTRL_2h	CTRL	0	2h	GBM3-LUC	Cyclin B1	21285.7
CTRL_2h	CTRL	0	2h	GBM3-LUC	Cyclin B1	18140.3
CTRL_8h	CTRL	0	8h	GBM3-LUC	Cyclin B1	21649.7
CTRL_8h	CTRL	0	8h	GBM3-LUC	Cyclin B1	18123.3
CTRL_8h	CTRL	0	8h	GBM3-LUC	Cyclin B1	18535.7
CTRL_2h	CTRL	0	2h	GBM3-LUC	Cyclin D1	45234.7
CTRL_2h	CTRL	0	2h	GBM3-LUC	Cyclin D1	41136.3
CTRL_2h	CTRL	0	2h	GBM3-LUC	Cyclin D1	38162.7
CTRL_8h	CTRL	0	8h	GBM3-LUC	Cyclin D1	39419
CTRL_8h	CTRL	0	8h	GBM3-LUC	Cyclin D1	26497.3
CTRL_8h	CTRL	0	8h	GBM3-LUC	Cyclin D1	30504
CTRL_2h	CTRL	0	2h	GBM3-LUC	EGFR pY1173	5533.67
CTRL_2h	CTRL	0	2h	GBM3-LUC	EGFR pY1173	6087.33
CTRL_2h	CTRL	0	2h	GBM3-LUC	EGFR pY1173	6665.33
CTRL_8h	CTRL	0	8h	GBM3-LUC	EGFR pY1173	7419.67
CTRL_8h	CTRL	0	8h	GBM3-LUC	EGFR pY1173	8463.67
CTRL_8h	CTRL	0	8h	GBM3-LUC	EGFR pY1173	7011.33
CTRL_2h	CTRL	0	2h	GBM3-LUC	EGFR pY845 MILK	131.2
CTRL_2h	CTRL	0	2h	GBM3-LUC	EGFR pY845 MILK	102.667
CTRL_2h	CTRL	0	2h	GBM3-LUC	EGFR pY845 MILK	79.7333
CTRL_8h	CTRL	0	8h	GBM3-LUC	EGFR pY845 MILK	68.25
CTRL_8h	CTRL	0	8h	GBM3-LUC	EGFR pY845 MILK	84.8
CTRL_8h	CTRL	0	8h	GBM3-LUC	EGFR pY845 MILK	82.4333
CTRL_2h	CTRL	0	2h	GBM3-LUC	ERG	15434.3
CTRL_2h	CTRL	0	2h	GBM3-LUC	ERG	15078.7
CTRL_2h	CTRL	0	2h	GBM3-LUC	ERG	14512
CTRL_8h	CTRL	0	8h	GBM3-LUC	ERG	18818
CTRL_8h	CTRL	0	8h	GBM3-LUC	ERG	21839.7
CTRL_8h	CTRL	0	8h	GBM3-LUC	ERG	16607.3
CTRL_2h	CTRL	0	2h	GBM3-LUC	Fatty Acid Synthase	5104
CTRL_2h	CTRL	0	2h	GBM3-LUC	Fatty Acid Synthase	4925.67
CTRL_2h	CTRL	0	2h	GBM3-LUC	Fatty Acid Synthase	4152
CTRL_8h	CTRL	0	8h	GBM3-LUC	Fatty Acid Synthase	6603.67
CTRL_8h	CTRL	0	8h	GBM3-LUC	Fatty Acid Synthase	9026.67
CTRL_8h	CTRL	0	8h	GBM3-LUC	Fatty Acid Synthase	4860.67
CTRL_2h	CTRL	0	2h	GBM3-LUC	Fodrin-a cl. D1185	12799
CTRL_2h	CTRL	0	2h	GBM3-LUC	Fodrin-a cl. D1185	13301.7
CTRL_2h	CTRL	0	2h	GBM3-LUC	Fodrin-a cl. D1185	14417
CTRL_8h	CTRL	0	8h	GBM3-LUC	Fodrin-a cl. D1185	16183
CTRL_8h	CTRL	0	8h	GBM3-LUC	Fodrin-a cl. D1185	16369.7
CTRL_8h	CTRL	0	8h	GBM3-LUC	Fodrin-a cl. D1185	15120
CTRL_2h	CTRL	0	2h	GBM3-LUC	FOXO1 pT24-FOXO3a pT32	15602.3
CTRL_2h	CTRL	0	2h	GBM3-LUC	FOXO1 pT24-FOXO3a pT32	18599
CTRL_2h	CTRL	0	2h	GBM3-LUC	FOXO1 pT24-FOXO3a pT32	21230.3
CTRL_8h	CTRL	0	8h	GBM3-LUC	FOXO1 pT24-FOXO3a pT32	12662.3
CTRL_8h	CTRL	0	8h	GBM3-LUC	FOXO1 pT24-FOXO3a pT32	24354.3
CTRL_8h	CTRL	0	8h	GBM3-LUC	FOXO1 pT24-FOXO3a pT32	19654.3
CTRL_2h	CTRL	0	2h	GBM3-LUC	GSK3ab pS21-9	15260.7
CTRL_2h	CTRL	0	2h	GBM3-LUC	GSK3ab pS21-9	13481.7
CTRL_2h	CTRL	0	2h	GBM3-LUC	GSK3ab pS21-9	20230.3
CTRL_8h	CTRL	0	8h	GBM3-LUC	GSK3ab pS21-9	12804.7
CTRL_8h	CTRL	0	8h	GBM3-LUC	GSK3ab pS21-9	17507.3
CTRL_8h	CTRL	0	8h	GBM3-LUC	GSK3ab pS21-9	16192.3
CTRL_2h	CTRL	0	2h	GBM3-LUC	GSK3-a/b pS279	56811
CTRL_2h	CTRL	0	2h	GBM3-LUC	GSK3-a/b pS279	67056.3
CTRL_2h	CTRL	0	2h	GBM3-LUC	GSK3-a/b pS279	72086.7
CTRL_8h	CTRL	0	8h	GBM3-LUC	GSK3-a/b pS279	76687
CTRL_8h	CTRL	0	8h	GBM3-LUC	GSK3-a/b pS279	56756.3
CTRL_8h	CTRL	0	8h	GBM3-LUC	GSK3-a/b pS279	60596.7
CTRL_2h	CTRL	0	2h	GBM3-LUC	GSK3b pS9	35406.7
CTRL_2h	CTRL	0	2h	GBM3-LUC	GSK3b pS9	25777.7
CTRL_2h	CTRL	0	2h	GBM3-LUC	GSK3b pS9	40780.3
CTRL_8h	CTRL	0	8h	GBM3-LUC	GSK3b pS9	29987
CTRL_8h	CTRL	0	8h	GBM3-LUC	GSK3b pS9	36745.7
CTRL_8h	CTRL	0	8h	GBM3-LUC	GSK3b pS9	34806.7
CTRL_2h	CTRL	0	2h	GBM3-LUC	H3-Histone pS10	3167
CTRL_2h	CTRL	0	2h	GBM3-LUC	H3-Histone pS10	3393.33
CTRL_2h	CTRL	0	2h	GBM3-LUC	H3-Histone pS10	2641
CTRL_8h	CTRL	0	8h	GBM3-LUC	H3-Histone pS10	6857.67
CTRL_8h	CTRL	0	8h	GBM3-LUC	H3-Histone pS10	13478.7
CTRL_8h	CTRL	0	8h	GBM3-LUC	H3-Histone pS10	5593
CTRL_2h	CTRL	0	2h	GBM3-LUC	IRS-1 pS612	9971.67
CTRL_2h	CTRL	0	2h	GBM3-LUC	IRS-1 pS612	10560.3
CTRL_2h	CTRL	0	2h	GBM3-LUC	IRS-1 pS612	9037.33
CTRL_8h	CTRL	0	8h	GBM3-LUC	IRS-1 pS612	10269
CTRL_8h	CTRL	0	8h	GBM3-LUC	IRS-1 pS612	10159
CTRL_8h	CTRL	0	8h	GBM3-LUC	IRS-1 pS612	9163.67
CTRL_2h	CTRL	0	2h	GBM3-LUC	p27_Kip1	19788.7
CTRL_2h	CTRL	0	2h	GBM3-LUC	p27_Kip1	23445
CTRL_2h	CTRL	0	2h	GBM3-LUC	p27_Kip1	24695.3
CTRL_8h	CTRL	0	8h	GBM3-LUC	p27_Kip1	23680.7
CTRL_8h	CTRL	0	8h	GBM3-LUC	p27_Kip1	21412.7
CTRL_8h	CTRL	0	8h	GBM3-LUC	p27_Kip1	22428
CTRL_2h	CTRL	0	2h	GBM3-LUC	LKB1 pS334	56615
CTRL_2h	CTRL	0	2h	GBM3-LUC	LKB1 pS334	57802.7
CTRL_2h	CTRL	0	2h	GBM3-LUC	LKB1 pS334	52302.3
CTRL_8h	CTRL	0	8h	GBM3-LUC	LKB1 pS334	85361
CTRL_8h	CTRL	0	8h	GBM3-LUC	LKB1 pS334	57022.3
CTRL_8h	CTRL	0	8h	GBM3-LUC	LKB1 pS334	54786.7
CTRL_2h	CTRL	0	2h	GBM3-LUC	MDM2 pS166	10825
CTRL_2h	CTRL	0	2h	GBM3-LUC	MDM2 pS166	10837.7
CTRL_2h	CTRL	0	2h	GBM3-LUC	MDM2 pS166	9562.67
CTRL_8h	CTRL	0	8h	GBM3-LUC	MDM2 pS166	15238.3
CTRL_8h	CTRL	0	8h	GBM3-LUC	MDM2 pS166	13336.7
CTRL_8h	CTRL	0	8h	GBM3-LUC	MDM2 pS166	11568.7
CTRL_2h	CTRL	0	2h	GBM3-LUC	MEK1-2 pS217-21	62365.7
CTRL_2h	CTRL	0	2h	GBM3-LUC	MEK1-2 pS217-21	57629
CTRL_2h	CTRL	0	2h	GBM3-LUC	MEK1-2 pS217-21	72118.7
CTRL_8h	CTRL	0	8h	GBM3-LUC	MEK1-2 pS217-21	59582.7
CTRL_8h	CTRL	0	8h	GBM3-LUC	MEK1-2 pS217-21	69192.3
CTRL_8h	CTRL	0	8h	GBM3-LUC	MEK1-2 pS217-21	80883.7
CTRL_2h	CTRL	0	2h	GBM3-LUC	MKK4 pS80	17213
CTRL_2h	CTRL	0	2h	GBM3-LUC	MKK4 pS80	15852.3
CTRL_2h	CTRL	0	2h	GBM3-LUC	MKK4 pS80	16682.7
CTRL_8h	CTRL	0	8h	GBM3-LUC	MKK4 pS80	18522
CTRL_8h	CTRL	0	8h	GBM3-LUC	MKK4 pS80	15978.7
CTRL_8h	CTRL	0	8h	GBM3-LUC	MKK4 pS80	14043.3
CTRL_2h	CTRL	0	2h	GBM3-LUC	MSK1 pS360	2096.67
CTRL_2h	CTRL	0	2h	GBM3-LUC	MSK1 pS360	2242.33
CTRL_2h	CTRL	0	2h	GBM3-LUC	MSK1 pS360	2382.67
CTRL_8h	CTRL	0	8h	GBM3-LUC	MSK1 pS360	2205.33
CTRL_8h	CTRL	0	8h	GBM3-LUC	MSK1 pS360	2495.33
CTRL_8h	CTRL	0	8h	GBM3-LUC	MSK1 pS360	2123.33
CTRL_2h	CTRL	0	2h	GBM3-LUC	mTOR pS2448	32730.7
CTRL_2h	CTRL	0	2h	GBM3-LUC	mTOR pS2448	36072.7
CTRL_2h	CTRL	0	2h	GBM3-LUC	mTOR pS2448	47862
CTRL_8h	CTRL	0	8h	GBM3-LUC	mTOR pS2448	63751.3
CTRL_8h	CTRL	0	8h	GBM3-LUC	mTOR pS2448	63070
CTRL_8h	CTRL	0	8h	GBM3-LUC	mTOR pS2448	55135.7
CTRL_2h	CTRL	0	2h	GBM3-LUC	mTOR pS2481	9262
CTRL_2h	CTRL	0	2h	GBM3-LUC	mTOR pS2481	9776.67
CTRL_2h	CTRL	0	2h	GBM3-LUC	mTOR pS2481	8849.33
CTRL_8h	CTRL	0	8h	GBM3-LUC	mTOR pS2481	13166.7
CTRL_8h	CTRL	0	8h	GBM3-LUC	mTOR pS2481	17251.7
CTRL_8h	CTRL	0	8h	GBM3-LUC	mTOR pS2481	13318.3
CTRL_2h	CTRL	0	2h	GBM3-LUC	NDRG1 pT346	20661.3
CTRL_2h	CTRL	0	2h	GBM3-LUC	NDRG1 pT346	22263.3
CTRL_2h	CTRL	0	2h	GBM3-LUC	NDRG1 pT346	34149.7
CTRL_8h	CTRL	0	8h	GBM3-LUC	NDRG1 pT346	14236.3
CTRL_8h	CTRL	0	8h	GBM3-LUC	NDRG1 pT346	16582.7
CTRL_8h	CTRL	0	8h	GBM3-LUC	NDRG1 pT346	15662.3
CTRL_2h	CTRL	0	2h	GBM3-LUC	NDRG1_pS330	80918.7
CTRL_2h	CTRL	0	2h	GBM3-LUC	NDRG1_pS330	85959.3
CTRL_2h	CTRL	0	2h	GBM3-LUC	NDRG1_pS330	101888
CTRL_8h	CTRL	0	8h	GBM3-LUC	NDRG1_pS330	112888
CTRL_8h	CTRL	0	8h	GBM3-LUC	NDRG1_pS330	80954
CTRL_8h	CTRL	0	8h	GBM3-LUC	NDRG1_pS330	87845
CTRL_2h	CTRL	0	2h	GBM3-LUC	NDRG1_pS330	67407.7
CTRL_2h	CTRL	0	2h	GBM3-LUC	NDRG1_pS330	69203
CTRL_2h	CTRL	0	2h	GBM3-LUC	NDRG1_pS330	82026.3
CTRL_8h	CTRL	0	8h	GBM3-LUC	NDRG1_pS330	78380
CTRL_8h	CTRL	0	8h	GBM3-LUC	NDRG1_pS330	67528.3
CTRL_8h	CTRL	0	8h	GBM3-LUC	NDRG1_pS330	69898.3
CTRL_2h	CTRL	0	2h	GBM3-LUC	p16_INK4A	1967
CTRL_2h	CTRL	0	2h	GBM3-LUC	p16_INK4A	2099.33
CTRL_2h	CTRL	0	2h	GBM3-LUC	p16_INK4A	2120.33
CTRL_8h	CTRL	0	8h	GBM3-LUC	p16_INK4A	2238.67
CTRL_8h	CTRL	0	8h	GBM3-LUC	p16_INK4A	1950.67
CTRL_8h	CTRL	0	8h	GBM3-LUC	p16_INK4A	2195
CTRL_2h	CTRL	0	2h	GBM3-LUC	p21_Waf1/Cip1	23704.3
CTRL_2h	CTRL	0	2h	GBM3-LUC	p21_Waf1/Cip1	25633.3
CTRL_2h	CTRL	0	2h	GBM3-LUC	p21_Waf1/Cip1	26590.7
CTRL_8h	CTRL	0	8h	GBM3-LUC	p21_Waf1/Cip1	29014.7
CTRL_8h	CTRL	0	8h	GBM3-LUC	p21_Waf1/Cip1	27626.3
CTRL_8h	CTRL	0	8h	GBM3-LUC	p21_Waf1/Cip1	24605.7
CTRL_2h	CTRL	0	2h	GBM3-LUC	p70S6K pS371	16309
CTRL_2h	CTRL	0	2h	GBM3-LUC	p70S6K pS371	12675.7
CTRL_2h	CTRL	0	2h	GBM3-LUC	p70S6K pS371	15289.3
CTRL_8h	CTRL	0	8h	GBM3-LUC	p70S6K pS371	15592.3
CTRL_8h	CTRL	0	8h	GBM3-LUC	p70S6K pS371	15673
CTRL_8h	CTRL	0	8h	GBM3-LUC	p70S6K pS371	14648.7
CTRL_2h	CTRL	0	2h	GBM3-LUC	p90RSK pS380	3928.33
CTRL_2h	CTRL	0	2h	GBM3-LUC	p90RSK pS380	5023.67
CTRL_2h	CTRL	0	2h	GBM3-LUC	p90RSK pS380	6360.33
CTRL_8h	CTRL	0	8h	GBM3-LUC	p90RSK pS380	3321.33
CTRL_8h	CTRL	0	8h	GBM3-LUC	p90RSK pS380	4797
CTRL_8h	CTRL	0	8h	GBM3-LUC	p90RSK pS380	4170.33
CTRL_2h	CTRL	0	2h	GBM3-LUC	PARP D214	7384.67
CTRL_2h	CTRL	0	2h	GBM3-LUC	PARP D214	5623
CTRL_2h	CTRL	0	2h	GBM3-LUC	PARP D214	6413.67
CTRL_8h	CTRL	0	8h	GBM3-LUC	PARP D214	6609.33
CTRL_8h	CTRL	0	8h	GBM3-LUC	PARP D214	8416
CTRL_8h	CTRL	0	8h	GBM3-LUC	PARP D214	5213
CTRL_2h	CTRL	0	2h	GBM3-LUC	PDGFR-b pY751	8982.67
CTRL_2h	CTRL	0	2h	GBM3-LUC	PDGFR-b pY751	10216.3
CTRL_2h	CTRL	0	2h	GBM3-LUC	PDGFR-b pY751	10214.3
CTRL_8h	CTRL	0	8h	GBM3-LUC	PDGFR-b pY751	15212.3
CTRL_8h	CTRL	0	8h	GBM3-LUC	PDGFR-b pY751	12245
CTRL_8h	CTRL	0	8h	GBM3-LUC	PDGFR-b pY751	10787
CTRL_2h	CTRL	0	2h	GBM3-LUC	PRAS40 pT246	4683.67
CTRL_2h	CTRL	0	2h	GBM3-LUC	PRAS40 pT246	4148.33
CTRL_2h	CTRL	0	2h	GBM3-LUC	PRAS40 pT246	4999.33
CTRL_8h	CTRL	0	8h	GBM3-LUC	PRAS40 pT246	4031.67
CTRL_8h	CTRL	0	8h	GBM3-LUC	PRAS40 pT246	5509
CTRL_8h	CTRL	0	8h	GBM3-LUC	PRAS40 pT246	5126.33
CTRL_2h	CTRL	0	2h	GBM3-LUC	ProgR pS190	637
CTRL_2h	CTRL	0	2h	GBM3-LUC	ProgR pS190	629.333
CTRL_2h	CTRL	0	2h	GBM3-LUC	ProgR pS190	808
CTRL_8h	CTRL	0	8h	GBM3-LUC	ProgR pS190	825.667
CTRL_8h	CTRL	0	8h	GBM3-LUC	ProgR pS190	602.667
CTRL_8h	CTRL	0	8h	GBM3-LUC	ProgR pS190	515
CTRL_2h	CTRL	0	2h	GBM3-LUC	S6RP pS235-236	3785.5
CTRL_2h	CTRL	0	2h	GBM3-LUC	S6RP pS235-236	2822.5
CTRL_2h	CTRL	0	2h	GBM3-LUC	S6RP pS235-236	2002
CTRL_8h	CTRL	0	8h	GBM3-LUC	S6RP pS235-236	5301.67
CTRL_8h	CTRL	0	8h	GBM3-LUC	S6RP pS235-236	6895
CTRL_8h	CTRL	0	8h	GBM3-LUC	S6RP pS235-236	636
CTRL_2h	CTRL	0	2h	GBM3-LUC	S6RP pS240-244	4036.5
CTRL_2h	CTRL	0	2h	GBM3-LUC	S6RP pS240-244	3641.5
CTRL_2h	CTRL	0	2h	GBM3-LUC	S6RP pS240-244	706.667
CTRL_8h	CTRL	0	8h	GBM3-LUC	S6RP pS240-244	5819.33
CTRL_8h	CTRL	0	8h	GBM3-LUC	S6RP pS240-244	6100
CTRL_8h	CTRL	0	8h	GBM3-LUC	S6RP pS240-244	2691
CTRL_2h	CTRL	0	2h	GBM3-LUC	SAP-JNK pT183-Y185	26726.3
CTRL_2h	CTRL	0	2h	GBM3-LUC	SAP-JNK pT183-Y185	27490
CTRL_2h	CTRL	0	2h	GBM3-LUC	SAP-JNK pT183-Y185	32727.7
CTRL_8h	CTRL	0	8h	GBM3-LUC	SAP-JNK pT183-Y185	22405
CTRL_8h	CTRL	0	8h	GBM3-LUC	SAP-JNK pT183-Y185	29890
CTRL_8h	CTRL	0	8h	GBM3-LUC	SAP-JNK pT183-Y185	34376.3
CTRL_2h	CTRL	0	2h	GBM3-LUC	SGK pS422	57184
CTRL_2h	CTRL	0	2h	GBM3-LUC	SGK pS422	36074
CTRL_2h	CTRL	0	2h	GBM3-LUC	SGK pS422	52638
CTRL_8h	CTRL	0	8h	GBM3-LUC	SGK pS422	29830.7
CTRL_8h	CTRL	0	8h	GBM3-LUC	SGK pS422	43570.7
CTRL_8h	CTRL	0	8h	GBM3-LUC	SGK pS422	51577
CTRL_2h	CTRL	0	2h	GBM3-LUC	SGK3	2732.33
CTRL_2h	CTRL	0	2h	GBM3-LUC	SGK3	2593.33
CTRL_2h	CTRL	0	2h	GBM3-LUC	SGK3	2498.67
CTRL_8h	CTRL	0	8h	GBM3-LUC	SGK3	3480.67
CTRL_8h	CTRL	0	8h	GBM3-LUC	SGK3	2738
CTRL_8h	CTRL	0	8h	GBM3-LUC	SGK3	2418
CTRL_2h	CTRL	0	2h	GBM3-LUC	SMAD1-5-8 pS-S-S	14152.3
CTRL_2h	CTRL	0	2h	GBM3-LUC	SMAD1-5-8 pS-S-S	12633
CTRL_2h	CTRL	0	2h	GBM3-LUC	SMAD1-5-8 pS-S-S	12322.3
CTRL_8h	CTRL	0	8h	GBM3-LUC	SMAD1-5-8 pS-S-S	13797.3
CTRL_8h	CTRL	0	8h	GBM3-LUC	SMAD1-5-8 pS-S-S	15592
CTRL_8h	CTRL	0	8h	GBM3-LUC	SMAD1-5-8 pS-S-S	13322
CTRL_2h	CTRL	0	2h	GBM3-LUC	SMAD2 pS465-67	17556
CTRL_2h	CTRL	0	2h	GBM3-LUC	SMAD2 pS465-67	15910.3
CTRL_2h	CTRL	0	2h	GBM3-LUC	SMAD2 pS465-67	13407.7
CTRL_8h	CTRL	0	8h	GBM3-LUC	SMAD2 pS465-67	17030.7
CTRL_8h	CTRL	0	8h	GBM3-LUC	SMAD2 pS465-67	14281.7
CTRL_8h	CTRL	0	8h	GBM3-LUC	SMAD2 pS465-67	14374.3
CTRL_2h	CTRL	0	2h	GBM3-LUC	SRC Family pY416	5688.67
CTRL_2h	CTRL	0	2h	GBM3-LUC	SRC Family pY416	5940
CTRL_2h	CTRL	0	2h	GBM3-LUC	SRC Family pY416	5800.67
CTRL_8h	CTRL	0	8h	GBM3-LUC	SRC Family pY416	5156.33
CTRL_8h	CTRL	0	8h	GBM3-LUC	SRC Family pY416	4764.33
CTRL_8h	CTRL	0	8h	GBM3-LUC	SRC Family pY416	4415.67
CTRL_2h	CTRL	0	2h	GBM3-LUC	STAT3 pS727	85361
CTRL_2h	CTRL	0	2h	GBM3-LUC	STAT3 pS727	85990.7
CTRL_2h	CTRL	0	2h	GBM3-LUC	STAT3 pS727	88398.3
CTRL_8h	CTRL	0	8h	GBM3-LUC	STAT3 pS727	81467.3
CTRL_8h	CTRL	0	8h	GBM3-LUC	STAT3 pS727	77383
CTRL_8h	CTRL	0	8h	GBM3-LUC	STAT3 pS727	77033.7
CTRL_2h	CTRL	0	2h	GBM3-LUC	STAT3 pY705	3166
CTRL_2h	CTRL	0	2h	GBM3-LUC	STAT3 pY705	3116.33
CTRL_2h	CTRL	0	2h	GBM3-LUC	STAT3 pY705	2965.67
CTRL_8h	CTRL	0	8h	GBM3-LUC	STAT3 pY705	9150
CTRL_8h	CTRL	0	8h	GBM3-LUC	STAT3 pY705	9830
CTRL_8h	CTRL	0	8h	GBM3-LUC	STAT3 pY705	8528.67
CTRL_2h	CTRL	0	2h	GBM3-LUC	STAT5 pY694	3375
CTRL_2h	CTRL	0	2h	GBM3-LUC	STAT5 pY694	3312.67
CTRL_2h	CTRL	0	2h	GBM3-LUC	STAT5 pY694	3610.67
CTRL_8h	CTRL	0	8h	GBM3-LUC	STAT5 pY694	4367.67
CTRL_8h	CTRL	0	8h	GBM3-LUC	STAT5 pY694	3457.67
CTRL_8h	CTRL	0	8h	GBM3-LUC	STAT5 pY694	3702
CTRL_2h	CTRL	0	2h	GBM3-LUC	Tuberin pY1571	15930
CTRL_2h	CTRL	0	2h	GBM3-LUC	Tuberin pY1571	14589.3
CTRL_2h	CTRL	0	2h	GBM3-LUC	Tuberin pY1571	15427
CTRL_8h	CTRL	0	8h	GBM3-LUC	Tuberin pY1571	20538
CTRL_8h	CTRL	0	8h	GBM3-LUC	Tuberin pY1571	15623.3
CTRL_8h	CTRL	0	8h	GBM3-LUC	Tuberin pY1571	16489.7
CTRL_2h	CTRL	0	2h	GBM3-LUC	VEGFR2 pY996	11195.7
CTRL_2h	CTRL	0	2h	GBM3-LUC	VEGFR2 pY996	12067.3
CTRL_2h	CTRL	0	2h	GBM3-LUC	VEGFR2 pY996	12990
CTRL_8h	CTRL	0	8h	GBM3-LUC	VEGFR2 pY996	14087.3
CTRL_8h	CTRL	0	8h	GBM3-LUC	VEGFR2 pY996	10005
CTRL_8h	CTRL	0	8h	GBM3-LUC	VEGFR2 pY996	10075.7
CTRL_2h	CTRL	0	2h	GBM3-LUC	Vimentin	3168
CTRL_2h	CTRL	0	2h	GBM3-LUC	Vimentin	1239.33
CTRL_2h	CTRL	0	2h	GBM3-LUC	Vimentin	245
CTRL_8h	CTRL	0	8h	GBM3-LUC	Vimentin	36601
CTRL_8h	CTRL	0	8h	GBM3-LUC	Vimentin	28381.3
CTRL_8h	CTRL	0	8h	GBM3-LUC	Vimentin	11042.3
SI113_IC30_2h	SI113	IC30	2h	GBM3-LUC	4E-BP1 pT3746	144659
SI113_IC30_2h	SI113	IC30	2h	GBM3-LUC	4E-BP1 pT3746	145976
SI113_IC30_2h	SI113	IC30	2h	GBM3-LUC	4E-BP1 pT3746	164835
SI113_IC30_8h	SI113	IC30	8h	GBM3-LUC	4E-BP1 pT3746	119408
SI113_IC30_8h	SI113	IC30	8h	GBM3-LUC	4E-BP1 pT3746	114829
SI113_IC30_8h	SI113	IC30	8h	GBM3-LUC	4E-BP1 pT3746	117258
SI113_IC30_2h	SI113	IC30	2h	GBM3-LUC	Ac-CoA Carboxylase pS79	36591
SI113_IC30_2h	SI113	IC30	2h	GBM3-LUC	Ac-CoA Carboxylase pS79	39815
SI113_IC30_2h	SI113	IC30	2h	GBM3-LUC	Ac-CoA Carboxylase pS79	43307.3
SI113_IC30_8h	SI113	IC30	8h	GBM3-LUC	Ac-CoA Carboxylase pS79	35866.3
SI113_IC30_8h	SI113	IC30	8h	GBM3-LUC	Ac-CoA Carboxylase pS79	38410
SI113_IC30_8h	SI113	IC30	8h	GBM3-LUC	Ac-CoA Carboxylase pS79	39305
SI113_IC30_2h	SI113	IC30	2h	GBM3-LUC	AKT pS473	15983.7
SI113_IC30_2h	SI113	IC30	2h	GBM3-LUC	AKT pS473	23147
SI113_IC30_2h	SI113	IC30	2h	GBM3-LUC	AKT pS473	45361
SI113_IC30_8h	SI113	IC30	8h	GBM3-LUC	AKT pS473	16863.7
SI113_IC30_8h	SI113	IC30	8h	GBM3-LUC	AKT pS473	17158
SI113_IC30_8h	SI113	IC30	8h	GBM3-LUC	AKT pS473	15609.3
SI113_IC30_2h	SI113	IC30	2h	GBM3-LUC	AKT pT308	7774.33
SI113_IC30_2h	SI113	IC30	2h	GBM3-LUC	AKT pT308	10447
SI113_IC30_2h	SI113	IC30	2h	GBM3-LUC	AKT pT308	21266
SI113_IC30_8h	SI113	IC30	8h	GBM3-LUC	AKT pT308	9847.33
SI113_IC30_8h	SI113	IC30	8h	GBM3-LUC	AKT pT308	7767.33
SI113_IC30_8h	SI113	IC30	8h	GBM3-LUC	AKT pT308	7652
SI113_IC30_2h	SI113	IC30	2h	GBM3-LUC	ALDH	245.667
SI113_IC30_2h	SI113	IC30	2h	GBM3-LUC	ALDH	242.333
SI113_IC30_2h	SI113	IC30	2h	GBM3-LUC	ALDH	296
SI113_IC30_8h	SI113	IC30	8h	GBM3-LUC	ALDH	198.667
SI113_IC30_8h	SI113	IC30	8h	GBM3-LUC	ALDH	263.667
SI113_IC30_8h	SI113	IC30	8h	GBM3-LUC	ALDH	216.667
SI113_IC30_2h	SI113	IC30	2h	GBM3-LUC	ALK	45985
SI113_IC30_2h	SI113	IC30	2h	GBM3-LUC	ALK	43371.3
SI113_IC30_2h	SI113	IC30	2h	GBM3-LUC	ALK	37076.3
SI113_IC30_8h	SI113	IC30	8h	GBM3-LUC	ALK	36969
SI113_IC30_8h	SI113	IC30	8h	GBM3-LUC	ALK	38589.3
SI113_IC30_8h	SI113	IC30	8h	GBM3-LUC	ALK	34975.7
SI113_IC30_2h	SI113	IC30	2h	GBM3-LUC	AMPKa pS485	7696.33
SI113_IC30_2h	SI113	IC30	2h	GBM3-LUC	AMPKa pS485	10193.7
SI113_IC30_2h	SI113	IC30	2h	GBM3-LUC	AMPKa pS485	9623.33
SI113_IC30_8h	SI113	IC30	8h	GBM3-LUC	AMPKa pS485	9690
SI113_IC30_8h	SI113	IC30	8h	GBM3-LUC	AMPKa pS485	10951.7
SI113_IC30_8h	SI113	IC30	8h	GBM3-LUC	AMPKa pS485	9940.67
SI113_IC30_2h	SI113	IC30	2h	GBM3-LUC	AMPKa pT172	8783
SI113_IC30_2h	SI113	IC30	2h	GBM3-LUC	AMPKa pT172	12326.7
SI113_IC30_2h	SI113	IC30	2h	GBM3-LUC	AMPKa pT172	20071
SI113_IC30_8h	SI113	IC30	8h	GBM3-LUC	AMPKa pT172	11180
SI113_IC30_8h	SI113	IC30	8h	GBM3-LUC	AMPKa pT172	10759.3
SI113_IC30_8h	SI113	IC30	8h	GBM3-LUC	AMPKa pT172	9453
SI113_IC30_2h	SI113	IC30	2h	GBM3-LUC	AMPKb pS108	1767
SI113_IC30_2h	SI113	IC30	2h	GBM3-LUC	AMPKb pS108	2540.67
SI113_IC30_2h	SI113	IC30	2h	GBM3-LUC	AMPKb pS108	1907.67
SI113_IC30_8h	SI113	IC30	8h	GBM3-LUC	AMPKb pS108	2300.33
SI113_IC30_8h	SI113	IC30	8h	GBM3-LUC	AMPKb pS108	2576.67
SI113_IC30_8h	SI113	IC30	8h	GBM3-LUC	AMPKb pS108	1910
SI113_IC30_2h	SI113	IC30	2h	GBM3-LUC	AndrRec	1563
SI113_IC30_2h	SI113	IC30	2h	GBM3-LUC	AndrRec	1409.67
SI113_IC30_2h	SI113	IC30	2h	GBM3-LUC	AndrRec	1214.33
SI113_IC30_8h	SI113	IC30	8h	GBM3-LUC	AndrRec	1208.33
SI113_IC30_8h	SI113	IC30	8h	GBM3-LUC	AndrRec	1400
SI113_IC30_8h	SI113	IC30	8h	GBM3-LUC	AndrRec	1272.33
SI113_IC30_2h	SI113	IC30	2h	GBM3-LUC	ASK1 pS83	1387.33
SI113_IC30_2h	SI113	IC30	2h	GBM3-LUC	ASK1 pS83	1714.67
SI113_IC30_2h	SI113	IC30	2h	GBM3-LUC	ASK1 pS83	1773.33
SI113_IC30_8h	SI113	IC30	8h	GBM3-LUC	ASK1 pS83	1385.67
SI113_IC30_8h	SI113	IC30	8h	GBM3-LUC	ASK1 pS83	1671
SI113_IC30_8h	SI113	IC30	8h	GBM3-LUC	ASK1 pS83	1340.67
SI113_IC30_2h	SI113	IC30	2h	GBM3-LUC	ATP-Citrate Lyase pS454	51259.3
SI113_IC30_2h	SI113	IC30	2h	GBM3-LUC	ATP-Citrate Lyase pS454	54830.3
SI113_IC30_2h	SI113	IC30	2h	GBM3-LUC	ATP-Citrate Lyase pS454	66303.3
SI113_IC30_8h	SI113	IC30	8h	GBM3-LUC	ATP-Citrate Lyase pS454	48901
SI113_IC30_8h	SI113	IC30	8h	GBM3-LUC	ATP-Citrate Lyase pS454	60522.3
SI113_IC30_8h	SI113	IC30	8h	GBM3-LUC	ATP-Citrate Lyase pS454	53958
SI113_IC30_2h	SI113	IC30	2h	GBM3-LUC	BAD pS112	8580
SI113_IC30_2h	SI113	IC30	2h	GBM3-LUC	BAD pS112	9311
SI113_IC30_2h	SI113	IC30	2h	GBM3-LUC	BAD pS112	10789.3
SI113_IC30_8h	SI113	IC30	8h	GBM3-LUC	BAD pS112	10878.7
SI113_IC30_8h	SI113	IC30	8h	GBM3-LUC	BAD pS112	11922.3
SI113_IC30_8h	SI113	IC30	8h	GBM3-LUC	BAD pS112	10105
SI113_IC30_2h	SI113	IC30	2h	GBM3-LUC	BAD pS155	20827
SI113_IC30_2h	SI113	IC30	2h	GBM3-LUC	BAD pS155	23347.3
SI113_IC30_2h	SI113	IC30	2h	GBM3-LUC	BAD pS155	21092.7
SI113_IC30_8h	SI113	IC30	8h	GBM3-LUC	BAD pS155	20894
SI113_IC30_8h	SI113	IC30	8h	GBM3-LUC	BAD pS155	22949.3
SI113_IC30_8h	SI113	IC30	8h	GBM3-LUC	BAD pS155	20691.7
SI113_IC30_2h	SI113	IC30	2h	GBM3-LUC	b-Catenin pT41/pS45	8654
SI113_IC30_2h	SI113	IC30	2h	GBM3-LUC	b-Catenin pT41/pS45	6471
SI113_IC30_2h	SI113	IC30	2h	GBM3-LUC	b-Catenin pT41/pS45	6983.67
SI113_IC30_8h	SI113	IC30	8h	GBM3-LUC	b-Catenin pT41/pS45	5771
SI113_IC30_8h	SI113	IC30	8h	GBM3-LUC	b-Catenin pT41/pS45	7655.67
SI113_IC30_8h	SI113	IC30	8h	GBM3-LUC	b-Catenin pT41/pS45	6376.67
SI113_IC30_2h	SI113	IC30	2h	GBM3-LUC	c-ABL pT735	7557
SI113_IC30_2h	SI113	IC30	2h	GBM3-LUC	c-ABL pT735	9837.67
SI113_IC30_2h	SI113	IC30	2h	GBM3-LUC	c-ABL pT735	10884.7
SI113_IC30_8h	SI113	IC30	8h	GBM3-LUC	c-ABL pT735	11219
SI113_IC30_8h	SI113	IC30	8h	GBM3-LUC	c-ABL pT735	11055
SI113_IC30_8h	SI113	IC30	8h	GBM3-LUC	c-ABL pT735	10513.3
SI113_IC30_2h	SI113	IC30	2h	GBM3-LUC	c-ABL pY245	603
SI113_IC30_2h	SI113	IC30	2h	GBM3-LUC	c-ABL pY245	814
SI113_IC30_2h	SI113	IC30	2h	GBM3-LUC	c-ABL pY245	712.333
SI113_IC30_8h	SI113	IC30	8h	GBM3-LUC	c-ABL pY245	666
SI113_IC30_8h	SI113	IC30	8h	GBM3-LUC	c-ABL pY245	615.333
SI113_IC30_8h	SI113	IC30	8h	GBM3-LUC	c-ABL pY245	613
SI113_IC30_2h	SI113	IC30	2h	GBM3-LUC	c-Myc pS62	1126.33
SI113_IC30_2h	SI113	IC30	2h	GBM3-LUC	c-Myc pS62	985.667
SI113_IC30_2h	SI113	IC30	2h	GBM3-LUC	c-Myc pS62	1001.33
SI113_IC30_8h	SI113	IC30	8h	GBM3-LUC	c-Myc pS62	957.667
SI113_IC30_8h	SI113	IC30	8h	GBM3-LUC	c-Myc pS62	1039.33
SI113_IC30_8h	SI113	IC30	8h	GBM3-LUC	c-Myc pS62	947
SI113_IC30_2h	SI113	IC30	2h	GBM3-LUC	Cyclin B1	14051.7
SI113_IC30_2h	SI113	IC30	2h	GBM3-LUC	Cyclin B1	15903
SI113_IC30_2h	SI113	IC30	2h	GBM3-LUC	Cyclin B1	15601.7
SI113_IC30_8h	SI113	IC30	8h	GBM3-LUC	Cyclin B1	12742
SI113_IC30_8h	SI113	IC30	8h	GBM3-LUC	Cyclin B1	14355.7
SI113_IC30_8h	SI113	IC30	8h	GBM3-LUC	Cyclin B1	12589.3
SI113_IC30_2h	SI113	IC30	2h	GBM3-LUC	Cyclin D1	20337.3
SI113_IC30_2h	SI113	IC30	2h	GBM3-LUC	Cyclin D1	31090.3
SI113_IC30_2h	SI113	IC30	2h	GBM3-LUC	Cyclin D1	27862.3
SI113_IC30_8h	SI113	IC30	8h	GBM3-LUC	Cyclin D1	20947
SI113_IC30_8h	SI113	IC30	8h	GBM3-LUC	Cyclin D1	22144
SI113_IC30_8h	SI113	IC30	8h	GBM3-LUC	Cyclin D1	17995.7
SI113_IC30_2h	SI113	IC30	2h	GBM3-LUC	EGFR pY1173	6144.33
SI113_IC30_2h	SI113	IC30	2h	GBM3-LUC	EGFR pY1173	4741.33
SI113_IC30_2h	SI113	IC30	2h	GBM3-LUC	EGFR pY1173	5079.67
SI113_IC30_8h	SI113	IC30	8h	GBM3-LUC	EGFR pY1173	4847.67
SI113_IC30_8h	SI113	IC30	8h	GBM3-LUC	EGFR pY1173	5716.33
SI113_IC30_8h	SI113	IC30	8h	GBM3-LUC	EGFR pY1173	5427.33
SI113_IC30_2h	SI113	IC30	2h	GBM3-LUC	EGFR pY845 MILK	88.6
SI113_IC30_2h	SI113	IC30	2h	GBM3-LUC	EGFR pY845 MILK	98.3
SI113_IC30_2h	SI113	IC30	2h	GBM3-LUC	EGFR pY845 MILK	111.8
SI113_IC30_8h	SI113	IC30	8h	GBM3-LUC	EGFR pY845 MILK	105.367
SI113_IC30_8h	SI113	IC30	8h	GBM3-LUC	EGFR pY845 MILK	103.867
SI113_IC30_8h	SI113	IC30	8h	GBM3-LUC	EGFR pY845 MILK	103.2
SI113_IC30_2h	SI113	IC30	2h	GBM3-LUC	ERG	13830
SI113_IC30_2h	SI113	IC30	2h	GBM3-LUC	ERG	12383
SI113_IC30_2h	SI113	IC30	2h	GBM3-LUC	ERG	11076.7
SI113_IC30_8h	SI113	IC30	8h	GBM3-LUC	ERG	10726.7
SI113_IC30_8h	SI113	IC30	8h	GBM3-LUC	ERG	11494.7
SI113_IC30_8h	SI113	IC30	8h	GBM3-LUC	ERG	9986.33
SI113_IC30_2h	SI113	IC30	2h	GBM3-LUC	Fatty Acid Synthase	3787.33
SI113_IC30_2h	SI113	IC30	2h	GBM3-LUC	Fatty Acid Synthase	4871
SI113_IC30_2h	SI113	IC30	2h	GBM3-LUC	Fatty Acid Synthase	3293.67
SI113_IC30_8h	SI113	IC30	8h	GBM3-LUC	Fatty Acid Synthase	3883.67
SI113_IC30_8h	SI113	IC30	8h	GBM3-LUC	Fatty Acid Synthase	4402
SI113_IC30_8h	SI113	IC30	8h	GBM3-LUC	Fatty Acid Synthase	2361.5
SI113_IC30_2h	SI113	IC30	2h	GBM3-LUC	Fodrin-a cl. D1185	11355.3
SI113_IC30_2h	SI113	IC30	2h	GBM3-LUC	Fodrin-a cl. D1185	10027.7
SI113_IC30_2h	SI113	IC30	2h	GBM3-LUC	Fodrin-a cl. D1185	10681.7
SI113_IC30_8h	SI113	IC30	8h	GBM3-LUC	Fodrin-a cl. D1185	8557.67
SI113_IC30_8h	SI113	IC30	8h	GBM3-LUC	Fodrin-a cl. D1185	9610.33
SI113_IC30_8h	SI113	IC30	8h	GBM3-LUC	Fodrin-a cl. D1185	8761.33
SI113_IC30_2h	SI113	IC30	2h	GBM3-LUC	FOXO1 pT24-FOXO3a pT32	9072.33
SI113_IC30_2h	SI113	IC30	2h	GBM3-LUC	FOXO1 pT24-FOXO3a pT32	8166.33
SI113_IC30_2h	SI113	IC30	2h	GBM3-LUC	FOXO1 pT24-FOXO3a pT32	9175.33
SI113_IC30_8h	SI113	IC30	8h	GBM3-LUC	FOXO1 pT24-FOXO3a pT32	6931
SI113_IC30_8h	SI113	IC30	8h	GBM3-LUC	FOXO1 pT24-FOXO3a pT32	10415
SI113_IC30_8h	SI113	IC30	8h	GBM3-LUC	FOXO1 pT24-FOXO3a pT32	8488
SI113_IC30_2h	SI113	IC30	2h	GBM3-LUC	GSK3ab pS21-9	9146
SI113_IC30_2h	SI113	IC30	2h	GBM3-LUC	GSK3ab pS21-9	7555.33
SI113_IC30_2h	SI113	IC30	2h	GBM3-LUC	GSK3ab pS21-9	9749
SI113_IC30_8h	SI113	IC30	8h	GBM3-LUC	GSK3ab pS21-9	5390
SI113_IC30_8h	SI113	IC30	8h	GBM3-LUC	GSK3ab pS21-9	7229.67
SI113_IC30_8h	SI113	IC30	8h	GBM3-LUC	GSK3ab pS21-9	5235.33
SI113_IC30_2h	SI113	IC30	2h	GBM3-LUC	GSK3-a/b pS279	39368.3
SI113_IC30_2h	SI113	IC30	2h	GBM3-LUC	GSK3-a/b pS279	37016.3
SI113_IC30_2h	SI113	IC30	2h	GBM3-LUC	GSK3-a/b pS279	44834
SI113_IC30_8h	SI113	IC30	8h	GBM3-LUC	GSK3-a/b pS279	33604.3
SI113_IC30_8h	SI113	IC30	8h	GBM3-LUC	GSK3-a/b pS279	42579
SI113_IC30_8h	SI113	IC30	8h	GBM3-LUC	GSK3-a/b pS279	38084.3
SI113_IC30_2h	SI113	IC30	2h	GBM3-LUC	GSK3b pS9	15563.7
SI113_IC30_2h	SI113	IC30	2h	GBM3-LUC	GSK3b pS9	15003.7
SI113_IC30_2h	SI113	IC30	2h	GBM3-LUC	GSK3b pS9	23234
SI113_IC30_8h	SI113	IC30	8h	GBM3-LUC	GSK3b pS9	13411.3
SI113_IC30_8h	SI113	IC30	8h	GBM3-LUC	GSK3b pS9	16356.7
SI113_IC30_8h	SI113	IC30	8h	GBM3-LUC	GSK3b pS9	13062
SI113_IC30_2h	SI113	IC30	2h	GBM3-LUC	H3-Histone pS10	6166.67
SI113_IC30_2h	SI113	IC30	2h	GBM3-LUC	H3-Histone pS10	3273.33
SI113_IC30_2h	SI113	IC30	2h	GBM3-LUC	H3-Histone pS10	2609.33
SI113_IC30_8h	SI113	IC30	8h	GBM3-LUC	H3-Histone pS10	2403.67
SI113_IC30_8h	SI113	IC30	8h	GBM3-LUC	H3-Histone pS10	1694
SI113_IC30_8h	SI113	IC30	8h	GBM3-LUC	H3-Histone pS10	2188.67
SI113_IC30_2h	SI113	IC30	2h	GBM3-LUC	IRS-1 pS612	5260.67
SI113_IC30_2h	SI113	IC30	2h	GBM3-LUC	IRS-1 pS612	5273
SI113_IC30_2h	SI113	IC30	2h	GBM3-LUC	IRS-1 pS612	5597.67
SI113_IC30_8h	SI113	IC30	8h	GBM3-LUC	IRS-1 pS612	4490.67
SI113_IC30_8h	SI113	IC30	8h	GBM3-LUC	IRS-1 pS612	5123.33
SI113_IC30_8h	SI113	IC30	8h	GBM3-LUC	IRS-1 pS612	5019.33
SI113_IC30_2h	SI113	IC30	2h	GBM3-LUC	p27_Kip1	18122
SI113_IC30_2h	SI113	IC30	2h	GBM3-LUC	p27_Kip1	17214.7
SI113_IC30_2h	SI113	IC30	2h	GBM3-LUC	p27_Kip1	19431.3
SI113_IC30_8h	SI113	IC30	8h	GBM3-LUC	p27_Kip1	18569
SI113_IC30_8h	SI113	IC30	8h	GBM3-LUC	p27_Kip1	23128.3
SI113_IC30_8h	SI113	IC30	8h	GBM3-LUC	p27_Kip1	22774
SI113_IC30_2h	SI113	IC30	2h	GBM3-LUC	LKB1 pS334	39419
SI113_IC30_2h	SI113	IC30	2h	GBM3-LUC	LKB1 pS334	59327.7
SI113_IC30_2h	SI113	IC30	2h	GBM3-LUC	LKB1 pS334	57022.3
SI113_IC30_8h	SI113	IC30	8h	GBM3-LUC	LKB1 pS334	54837.7
SI113_IC30_8h	SI113	IC30	8h	GBM3-LUC	LKB1 pS334	58298.7
SI113_IC30_8h	SI113	IC30	8h	GBM3-LUC	LKB1 pS334	54357
SI113_IC30_2h	SI113	IC30	2h	GBM3-LUC	MDM2 pS166	5774
SI113_IC30_2h	SI113	IC30	2h	GBM3-LUC	MDM2 pS166	6763.33
SI113_IC30_2h	SI113	IC30	2h	GBM3-LUC	MDM2 pS166	6422.33
SI113_IC30_8h	SI113	IC30	8h	GBM3-LUC	MDM2 pS166	5754
SI113_IC30_8h	SI113	IC30	8h	GBM3-LUC	MDM2 pS166	6592
SI113_IC30_8h	SI113	IC30	8h	GBM3-LUC	MDM2 pS166	6235.67
SI113_IC30_2h	SI113	IC30	2h	GBM3-LUC	MEK1-2 pS217-21	36613
SI113_IC30_2h	SI113	IC30	2h	GBM3-LUC	MEK1-2 pS217-21	38629.7
SI113_IC30_2h	SI113	IC30	2h	GBM3-LUC	MEK1-2 pS217-21	50421
SI113_IC30_8h	SI113	IC30	8h	GBM3-LUC	MEK1-2 pS217-21	44435
SI113_IC30_8h	SI113	IC30	8h	GBM3-LUC	MEK1-2 pS217-21	49422.7
SI113_IC30_8h	SI113	IC30	8h	GBM3-LUC	MEK1-2 pS217-21	44274.7
SI113_IC30_2h	SI113	IC30	2h	GBM3-LUC	MKK4 pS80	11445.7
SI113_IC30_2h	SI113	IC30	2h	GBM3-LUC	MKK4 pS80	12286.7
SI113_IC30_2h	SI113	IC30	2h	GBM3-LUC	MKK4 pS80	12486.3
SI113_IC30_8h	SI113	IC30	8h	GBM3-LUC	MKK4 pS80	12554.7
SI113_IC30_8h	SI113	IC30	8h	GBM3-LUC	MKK4 pS80	12712.7
SI113_IC30_8h	SI113	IC30	8h	GBM3-LUC	MKK4 pS80	11637.3
SI113_IC30_2h	SI113	IC30	2h	GBM3-LUC	MSK1 pS360	1581
SI113_IC30_2h	SI113	IC30	2h	GBM3-LUC	MSK1 pS360	1972.67
SI113_IC30_2h	SI113	IC30	2h	GBM3-LUC	MSK1 pS360	1979.33
SI113_IC30_8h	SI113	IC30	8h	GBM3-LUC	MSK1 pS360	1852.67
SI113_IC30_8h	SI113	IC30	8h	GBM3-LUC	MSK1 pS360	1834.33
SI113_IC30_8h	SI113	IC30	8h	GBM3-LUC	MSK1 pS360	1860
SI113_IC30_2h	SI113	IC30	2h	GBM3-LUC	mTOR pS2448	29649.3
SI113_IC30_2h	SI113	IC30	2h	GBM3-LUC	mTOR pS2448	18122.7
SI113_IC30_2h	SI113	IC30	2h	GBM3-LUC	mTOR pS2448	25665.7
SI113_IC30_8h	SI113	IC30	8h	GBM3-LUC	mTOR pS2448	16096
SI113_IC30_8h	SI113	IC30	8h	GBM3-LUC	mTOR pS2448	24026.3
SI113_IC30_8h	SI113	IC30	8h	GBM3-LUC	mTOR pS2448	21434
SI113_IC30_2h	SI113	IC30	2h	GBM3-LUC	mTOR pS2481	11230
SI113_IC30_2h	SI113	IC30	2h	GBM3-LUC	mTOR pS2481	6585.67
SI113_IC30_2h	SI113	IC30	2h	GBM3-LUC	mTOR pS2481	6677.33
SI113_IC30_8h	SI113	IC30	8h	GBM3-LUC	mTOR pS2481	5196.67
SI113_IC30_8h	SI113	IC30	8h	GBM3-LUC	mTOR pS2481	7049.67
SI113_IC30_8h	SI113	IC30	8h	GBM3-LUC	mTOR pS2481	5775.67
SI113_IC30_2h	SI113	IC30	2h	GBM3-LUC	NDRG1 pT346	12723.7
SI113_IC30_2h	SI113	IC30	2h	GBM3-LUC	NDRG1 pT346	11623.3
SI113_IC30_2h	SI113	IC30	2h	GBM3-LUC	NDRG1 pT346	18852
SI113_IC30_8h	SI113	IC30	8h	GBM3-LUC	NDRG1 pT346	5786.33
SI113_IC30_8h	SI113	IC30	8h	GBM3-LUC	NDRG1 pT346	6821
SI113_IC30_8h	SI113	IC30	8h	GBM3-LUC	NDRG1 pT346	6194.33
SI113_IC30_2h	SI113	IC30	2h	GBM3-LUC	NDRG1_pS330	64429.7
SI113_IC30_2h	SI113	IC30	2h	GBM3-LUC	NDRG1_pS330	63416.7
SI113_IC30_2h	SI113	IC30	2h	GBM3-LUC	NDRG1_pS330	73755.7
SI113_IC30_8h	SI113	IC30	8h	GBM3-LUC	NDRG1_pS330	46318
SI113_IC30_8h	SI113	IC30	8h	GBM3-LUC	NDRG1_pS330	49991.7
SI113_IC30_8h	SI113	IC30	8h	GBM3-LUC	NDRG1_pS330	44462.7
SI113_IC30_2h	SI113	IC30	2h	GBM3-LUC	NDRG1_pS330	52555
SI113_IC30_2h	SI113	IC30	2h	GBM3-LUC	NDRG1_pS330	50387
SI113_IC30_2h	SI113	IC30	2h	GBM3-LUC	NDRG1_pS330	59072.7
SI113_IC30_8h	SI113	IC30	8h	GBM3-LUC	NDRG1_pS330	37076.3
SI113_IC30_8h	SI113	IC30	8h	GBM3-LUC	NDRG1_pS330	40378.7
SI113_IC30_8h	SI113	IC30	8h	GBM3-LUC	NDRG1_pS330	36237
SI113_IC30_2h	SI113	IC30	2h	GBM3-LUC	p16_INK4A	1716.67
SI113_IC30_2h	SI113	IC30	2h	GBM3-LUC	p16_INK4A	2103
SI113_IC30_2h	SI113	IC30	2h	GBM3-LUC	p16_INK4A	2227
SI113_IC30_8h	SI113	IC30	8h	GBM3-LUC	p16_INK4A	1860.67
SI113_IC30_8h	SI113	IC30	8h	GBM3-LUC	p16_INK4A	2036.33
SI113_IC30_8h	SI113	IC30	8h	GBM3-LUC	p16_INK4A	1948.67
SI113_IC30_2h	SI113	IC30	2h	GBM3-LUC	p21_Waf1/Cip1	16004.7
SI113_IC30_2h	SI113	IC30	2h	GBM3-LUC	p21_Waf1/Cip1	18127.7
SI113_IC30_2h	SI113	IC30	2h	GBM3-LUC	p21_Waf1/Cip1	19208
SI113_IC30_8h	SI113	IC30	8h	GBM3-LUC	p21_Waf1/Cip1	10115.7
SI113_IC30_8h	SI113	IC30	8h	GBM3-LUC	p21_Waf1/Cip1	10606
SI113_IC30_8h	SI113	IC30	8h	GBM3-LUC	p21_Waf1/Cip1	9721
SI113_IC30_2h	SI113	IC30	2h	GBM3-LUC	p70S6K pS371	7705
SI113_IC30_2h	SI113	IC30	2h	GBM3-LUC	p70S6K pS371	7885.67
SI113_IC30_2h	SI113	IC30	2h	GBM3-LUC	p70S6K pS371	12123.3
SI113_IC30_8h	SI113	IC30	8h	GBM3-LUC	p70S6K pS371	12446.3
SI113_IC30_8h	SI113	IC30	8h	GBM3-LUC	p70S6K pS371	11314.3
SI113_IC30_8h	SI113	IC30	8h	GBM3-LUC	p70S6K pS371	10905
SI113_IC30_2h	SI113	IC30	2h	GBM3-LUC	p90RSK pS380	1247.67
SI113_IC30_2h	SI113	IC30	2h	GBM3-LUC	p90RSK pS380	1211
SI113_IC30_2h	SI113	IC30	2h	GBM3-LUC	p90RSK pS380	1803.67
SI113_IC30_8h	SI113	IC30	8h	GBM3-LUC	p90RSK pS380	2995.33
SI113_IC30_8h	SI113	IC30	8h	GBM3-LUC	p90RSK pS380	2686.67
SI113_IC30_8h	SI113	IC30	8h	GBM3-LUC	p90RSK pS380	2334.33
SI113_IC30_2h	SI113	IC30	2h	GBM3-LUC	PARP D214	2434.67
SI113_IC30_2h	SI113	IC30	2h	GBM3-LUC	PARP D214	2632.33
SI113_IC30_2h	SI113	IC30	2h	GBM3-LUC	PARP D214	2793.67
SI113_IC30_8h	SI113	IC30	8h	GBM3-LUC	PARP D214	2899.33
SI113_IC30_8h	SI113	IC30	8h	GBM3-LUC	PARP D214	2653
SI113_IC30_8h	SI113	IC30	8h	GBM3-LUC	PARP D214	2613.33
SI113_IC30_2h	SI113	IC30	2h	GBM3-LUC	PDGFR-b pY751	7685.33
SI113_IC30_2h	SI113	IC30	2h	GBM3-LUC	PDGFR-b pY751	7940.33
SI113_IC30_2h	SI113	IC30	2h	GBM3-LUC	PDGFR-b pY751	8544.67
SI113_IC30_8h	SI113	IC30	8h	GBM3-LUC	PDGFR-b pY751	7312
SI113_IC30_8h	SI113	IC30	8h	GBM3-LUC	PDGFR-b pY751	9211.67
SI113_IC30_8h	SI113	IC30	8h	GBM3-LUC	PDGFR-b pY751	8030.33
SI113_IC30_2h	SI113	IC30	2h	GBM3-LUC	PRAS40 pT246	3272.33
SI113_IC30_2h	SI113	IC30	2h	GBM3-LUC	PRAS40 pT246	2817.67
SI113_IC30_2h	SI113	IC30	2h	GBM3-LUC	PRAS40 pT246	3169.67
SI113_IC30_8h	SI113	IC30	8h	GBM3-LUC	PRAS40 pT246	1762.33
SI113_IC30_8h	SI113	IC30	8h	GBM3-LUC	PRAS40 pT246	1975.67
SI113_IC30_8h	SI113	IC30	8h	GBM3-LUC	PRAS40 pT246	1584
SI113_IC30_2h	SI113	IC30	2h	GBM3-LUC	ProgR pS190	363.667
SI113_IC30_2h	SI113	IC30	2h	GBM3-LUC	ProgR pS190	620.667
SI113_IC30_2h	SI113	IC30	2h	GBM3-LUC	ProgR pS190	631.667
SI113_IC30_8h	SI113	IC30	8h	GBM3-LUC	ProgR pS190	515.333
SI113_IC30_8h	SI113	IC30	8h	GBM3-LUC	ProgR pS190	446
SI113_IC30_8h	SI113	IC30	8h	GBM3-LUC	ProgR pS190	332
SI113_IC30_2h	SI113	IC30	2h	GBM3-LUC	S6RP pS235-236	346
SI113_IC30_2h	SI113	IC30	2h	GBM3-LUC	S6RP pS235-236	372
SI113_IC30_2h	SI113	IC30	2h	GBM3-LUC	S6RP pS235-236	279
SI113_IC30_8h	SI113	IC30	8h	GBM3-LUC	S6RP pS235-236	355
SI113_IC30_8h	SI113	IC30	8h	GBM3-LUC	S6RP pS235-236	308
SI113_IC30_8h	SI113	IC30	8h	GBM3-LUC	S6RP pS235-236	325.333
SI113_IC30_2h	SI113	IC30	2h	GBM3-LUC	S6RP pS240-244	443.5
SI113_IC30_2h	SI113	IC30	2h	GBM3-LUC	S6RP pS240-244	506.5
SI113_IC30_2h	SI113	IC30	2h	GBM3-LUC	S6RP pS240-244	437
SI113_IC30_8h	SI113	IC30	8h	GBM3-LUC	S6RP pS240-244	529.5
SI113_IC30_8h	SI113	IC30	8h	GBM3-LUC	S6RP pS240-244	656
SI113_IC30_8h	SI113	IC30	8h	GBM3-LUC	S6RP pS240-244	643.333
SI113_IC30_2h	SI113	IC30	2h	GBM3-LUC	SAP-JNK pT183-Y185	24365
SI113_IC30_2h	SI113	IC30	2h	GBM3-LUC	SAP-JNK pT183-Y185	14982.3
SI113_IC30_2h	SI113	IC30	2h	GBM3-LUC	SAP-JNK pT183-Y185	17954
SI113_IC30_8h	SI113	IC30	8h	GBM3-LUC	SAP-JNK pT183-Y185	12579.3
SI113_IC30_8h	SI113	IC30	8h	GBM3-LUC	SAP-JNK pT183-Y185	15400.3
SI113_IC30_8h	SI113	IC30	8h	GBM3-LUC	SAP-JNK pT183-Y185	12578.3
SI113_IC30_2h	SI113	IC30	2h	GBM3-LUC	SGK pS422	27055
SI113_IC30_2h	SI113	IC30	2h	GBM3-LUC	SGK pS422	30785.3
SI113_IC30_2h	SI113	IC30	2h	GBM3-LUC	SGK pS422	43218.7
SI113_IC30_8h	SI113	IC30	8h	GBM3-LUC	SGK pS422	57802.7
SI113_IC30_8h	SI113	IC30	8h	GBM3-LUC	SGK pS422	54810.3
SI113_IC30_8h	SI113	IC30	8h	GBM3-LUC	SGK pS422	47673.7
SI113_IC30_2h	SI113	IC30	2h	GBM3-LUC	SGK3	2160.33
SI113_IC30_2h	SI113	IC30	2h	GBM3-LUC	SGK3	2340.33
SI113_IC30_2h	SI113	IC30	2h	GBM3-LUC	SGK3	2371.67
SI113_IC30_8h	SI113	IC30	8h	GBM3-LUC	SGK3	1628.67
SI113_IC30_8h	SI113	IC30	8h	GBM3-LUC	SGK3	2014.33
SI113_IC30_8h	SI113	IC30	8h	GBM3-LUC	SGK3	1958.33
SI113_IC30_2h	SI113	IC30	2h	GBM3-LUC	SMAD1-5-8 pS-S-S	9479
SI113_IC30_2h	SI113	IC30	2h	GBM3-LUC	SMAD1-5-8 pS-S-S	11259.3
SI113_IC30_2h	SI113	IC30	2h	GBM3-LUC	SMAD1-5-8 pS-S-S	10188.7
SI113_IC30_8h	SI113	IC30	8h	GBM3-LUC	SMAD1-5-8 pS-S-S	9131.67
SI113_IC30_8h	SI113	IC30	8h	GBM3-LUC	SMAD1-5-8 pS-S-S	8521.67
SI113_IC30_8h	SI113	IC30	8h	GBM3-LUC	SMAD1-5-8 pS-S-S	8216.67
SI113_IC30_2h	SI113	IC30	2h	GBM3-LUC	SMAD2 pS465-67	11869.7
SI113_IC30_2h	SI113	IC30	2h	GBM3-LUC	SMAD2 pS465-67	16699.7
SI113_IC30_2h	SI113	IC30	2h	GBM3-LUC	SMAD2 pS465-67	14146.7
SI113_IC30_8h	SI113	IC30	8h	GBM3-LUC	SMAD2 pS465-67	14434
SI113_IC30_8h	SI113	IC30	8h	GBM3-LUC	SMAD2 pS465-67	11852
SI113_IC30_8h	SI113	IC30	8h	GBM3-LUC	SMAD2 pS465-67	11805.7
SI113_IC30_2h	SI113	IC30	2h	GBM3-LUC	SRC Family pY416	3092.33
SI113_IC30_2h	SI113	IC30	2h	GBM3-LUC	SRC Family pY416	3977.67
SI113_IC30_2h	SI113	IC30	2h	GBM3-LUC	SRC Family pY416	3998.33
SI113_IC30_8h	SI113	IC30	8h	GBM3-LUC	SRC Family pY416	3310
SI113_IC30_8h	SI113	IC30	8h	GBM3-LUC	SRC Family pY416	3321
SI113_IC30_8h	SI113	IC30	8h	GBM3-LUC	SRC Family pY416	3181.33
SI113_IC30_2h	SI113	IC30	2h	GBM3-LUC	STAT3 pS727	38324.3
SI113_IC30_2h	SI113	IC30	2h	GBM3-LUC	STAT3 pS727	38490.3
SI113_IC30_2h	SI113	IC30	2h	GBM3-LUC	STAT3 pS727	45241.7
SI113_IC30_8h	SI113	IC30	8h	GBM3-LUC	STAT3 pS727	38085
SI113_IC30_8h	SI113	IC30	8h	GBM3-LUC	STAT3 pS727	42647.7
SI113_IC30_8h	SI113	IC30	8h	GBM3-LUC	STAT3 pS727	44035.3
SI113_IC30_2h	SI113	IC30	2h	GBM3-LUC	STAT3 pY705	8737.67
SI113_IC30_2h	SI113	IC30	2h	GBM3-LUC	STAT3 pY705	7909.67
SI113_IC30_2h	SI113	IC30	2h	GBM3-LUC	STAT3 pY705	7576.33
SI113_IC30_8h	SI113	IC30	8h	GBM3-LUC	STAT3 pY705	5848.67
SI113_IC30_8h	SI113	IC30	8h	GBM3-LUC	STAT3 pY705	5697.67
SI113_IC30_8h	SI113	IC30	8h	GBM3-LUC	STAT3 pY705	5407.67
SI113_IC30_2h	SI113	IC30	2h	GBM3-LUC	STAT5 pY694	2872.67
SI113_IC30_2h	SI113	IC30	2h	GBM3-LUC	STAT5 pY694	2216
SI113_IC30_2h	SI113	IC30	2h	GBM3-LUC	STAT5 pY694	2603.67
SI113_IC30_8h	SI113	IC30	8h	GBM3-LUC	STAT5 pY694	1166.67
SI113_IC30_8h	SI113	IC30	8h	GBM3-LUC	STAT5 pY694	1582
SI113_IC30_8h	SI113	IC30	8h	GBM3-LUC	STAT5 pY694	1181.67
SI113_IC30_2h	SI113	IC30	2h	GBM3-LUC	Tuberin pY1571	13519.7
SI113_IC30_2h	SI113	IC30	2h	GBM3-LUC	Tuberin pY1571	15679
SI113_IC30_2h	SI113	IC30	2h	GBM3-LUC	Tuberin pY1571	15687.7
SI113_IC30_8h	SI113	IC30	8h	GBM3-LUC	Tuberin pY1571	12281
SI113_IC30_8h	SI113	IC30	8h	GBM3-LUC	Tuberin pY1571	13712
SI113_IC30_8h	SI113	IC30	8h	GBM3-LUC	Tuberin pY1571	13447.7
SI113_IC30_2h	SI113	IC30	2h	GBM3-LUC	VEGFR2 pY996	8891.67
SI113_IC30_2h	SI113	IC30	2h	GBM3-LUC	VEGFR2 pY996	9157.67
SI113_IC30_2h	SI113	IC30	2h	GBM3-LUC	VEGFR2 pY996	9353.67
SI113_IC30_8h	SI113	IC30	8h	GBM3-LUC	VEGFR2 pY996	6152
SI113_IC30_8h	SI113	IC30	8h	GBM3-LUC	VEGFR2 pY996	7197
SI113_IC30_8h	SI113	IC30	8h	GBM3-LUC	VEGFR2 pY996	6091.33
SI113_IC30_2h	SI113	IC30	2h	GBM3-LUC	Vimentin	1804
SI113_IC30_2h	SI113	IC30	2h	GBM3-LUC	Vimentin	2029.67
SI113_IC30_2h	SI113	IC30	2h	GBM3-LUC	Vimentin	933.333
SI113_IC30_8h	SI113	IC30	8h	GBM3-LUC	Vimentin	28730
SI113_IC30_8h	SI113	IC30	8h	GBM3-LUC	Vimentin	25800
SI113_IC30_8h	SI113	IC30	8h	GBM3-LUC	Vimentin	12127.5
SI113_IC50_8h	SI113	IC50	8h	GBM3-LUC	4E-BP1 pT3746	112514
SI113_IC50_8h	SI113	IC50	8h	GBM3-LUC	4E-BP1 pT3746	95465.7
SI113_IC50_8h	SI113	IC50	8h	GBM3-LUC	4E-BP1 pT3746	114752
SI113_IC50_2h	SI113	IC50	2h	GBM3-LUC	4E-BP1 pT3746	126906
SI113_IC50_2h	SI113	IC50	2h	GBM3-LUC	4E-BP1 pT3746	114936
SI113_IC50_2h	SI113	IC50	2h	GBM3-LUC	4E-BP1 pT3746	120897
SI113_IC50_8h	SI113	IC50	8h	GBM3-LUC	Ac-CoA Carboxylase pS79	78600.3
SI113_IC50_8h	SI113	IC50	8h	GBM3-LUC	Ac-CoA Carboxylase pS79	62786
SI113_IC50_8h	SI113	IC50	8h	GBM3-LUC	Ac-CoA Carboxylase pS79	67652
SI113_IC50_2h	SI113	IC50	2h	GBM3-LUC	Ac-CoA Carboxylase pS79	68370.7
SI113_IC50_2h	SI113	IC50	2h	GBM3-LUC	Ac-CoA Carboxylase pS79	67106
SI113_IC50_2h	SI113	IC50	2h	GBM3-LUC	Ac-CoA Carboxylase pS79	57382
SI113_IC50_8h	SI113	IC50	8h	GBM3-LUC	AKT pS473	35667.7
SI113_IC50_8h	SI113	IC50	8h	GBM3-LUC	AKT pS473	17465
SI113_IC50_8h	SI113	IC50	8h	GBM3-LUC	AKT pS473	29507.7
SI113_IC50_2h	SI113	IC50	2h	GBM3-LUC	AKT pS473	11941
SI113_IC50_2h	SI113	IC50	2h	GBM3-LUC	AKT pS473	14060.3
SI113_IC50_2h	SI113	IC50	2h	GBM3-LUC	AKT pS473	7815.33
SI113_IC50_8h	SI113	IC50	8h	GBM3-LUC	AKT pT308	10255.3
SI113_IC50_8h	SI113	IC50	8h	GBM3-LUC	AKT pT308	6751.33
SI113_IC50_8h	SI113	IC50	8h	GBM3-LUC	AKT pT308	10438
SI113_IC50_2h	SI113	IC50	2h	GBM3-LUC	AKT pT308	9400.33
SI113_IC50_2h	SI113	IC50	2h	GBM3-LUC	AKT pT308	9712
SI113_IC50_2h	SI113	IC50	2h	GBM3-LUC	AKT pT308	5522.67
SI113_IC50_8h	SI113	IC50	8h	GBM3-LUC	ALDH	286.667
SI113_IC50_8h	SI113	IC50	8h	GBM3-LUC	ALDH	201.333
SI113_IC50_8h	SI113	IC50	8h	GBM3-LUC	ALDH	190.333
SI113_IC50_2h	SI113	IC50	2h	GBM3-LUC	ALDH	382.667
SI113_IC50_2h	SI113	IC50	2h	GBM3-LUC	ALDH	383.333
SI113_IC50_2h	SI113	IC50	2h	GBM3-LUC	ALDH	354.667
SI113_IC50_8h	SI113	IC50	8h	GBM3-LUC	ALK	42430.7
SI113_IC50_8h	SI113	IC50	8h	GBM3-LUC	ALK	39815
SI113_IC50_8h	SI113	IC50	8h	GBM3-LUC	ALK	36904
SI113_IC50_2h	SI113	IC50	2h	GBM3-LUC	ALK	38813.3
SI113_IC50_2h	SI113	IC50	2h	GBM3-LUC	ALK	49552
SI113_IC50_2h	SI113	IC50	2h	GBM3-LUC	ALK	43564.3
SI113_IC50_8h	SI113	IC50	8h	GBM3-LUC	AMPKa pS485	13403.7
SI113_IC50_8h	SI113	IC50	8h	GBM3-LUC	AMPKa pS485	9204.67
SI113_IC50_8h	SI113	IC50	8h	GBM3-LUC	AMPKa pS485	11725.3
SI113_IC50_2h	SI113	IC50	2h	GBM3-LUC	AMPKa pS485	10883.3
SI113_IC50_2h	SI113	IC50	2h	GBM3-LUC	AMPKa pS485	12948
SI113_IC50_2h	SI113	IC50	2h	GBM3-LUC	AMPKa pS485	10402
SI113_IC50_8h	SI113	IC50	8h	GBM3-LUC	AMPKa pT172	19205.3
SI113_IC50_8h	SI113	IC50	8h	GBM3-LUC	AMPKa pT172	19412.3
SI113_IC50_8h	SI113	IC50	8h	GBM3-LUC	AMPKa pT172	35453
SI113_IC50_2h	SI113	IC50	2h	GBM3-LUC	AMPKa pT172	30004.7
SI113_IC50_2h	SI113	IC50	2h	GBM3-LUC	AMPKa pT172	31444
SI113_IC50_2h	SI113	IC50	2h	GBM3-LUC	AMPKa pT172	10585.3
SI113_IC50_8h	SI113	IC50	8h	GBM3-LUC	AMPKb pS108	3160.67
SI113_IC50_8h	SI113	IC50	8h	GBM3-LUC	AMPKb pS108	2676.67
SI113_IC50_8h	SI113	IC50	8h	GBM3-LUC	AMPKb pS108	3333.67
SI113_IC50_2h	SI113	IC50	2h	GBM3-LUC	AMPKb pS108	2638
SI113_IC50_2h	SI113	IC50	2h	GBM3-LUC	AMPKb pS108	3142.33
SI113_IC50_2h	SI113	IC50	2h	GBM3-LUC	AMPKb pS108	2516
SI113_IC50_8h	SI113	IC50	8h	GBM3-LUC	AndrRec	1196
SI113_IC50_8h	SI113	IC50	8h	GBM3-LUC	AndrRec	1337
SI113_IC50_8h	SI113	IC50	8h	GBM3-LUC	AndrRec	1303.33
SI113_IC50_2h	SI113	IC50	2h	GBM3-LUC	AndrRec	1177
SI113_IC50_2h	SI113	IC50	2h	GBM3-LUC	AndrRec	1422.33
SI113_IC50_2h	SI113	IC50	2h	GBM3-LUC	AndrRec	1379.33
SI113_IC50_8h	SI113	IC50	8h	GBM3-LUC	ASK1 pS83	1411
SI113_IC50_8h	SI113	IC50	8h	GBM3-LUC	ASK1 pS83	1243.67
SI113_IC50_8h	SI113	IC50	8h	GBM3-LUC	ASK1 pS83	1349.33
SI113_IC50_2h	SI113	IC50	2h	GBM3-LUC	ASK1 pS83	1315.33
SI113_IC50_2h	SI113	IC50	2h	GBM3-LUC	ASK1 pS83	1464.67
SI113_IC50_2h	SI113	IC50	2h	GBM3-LUC	ASK1 pS83	1569
SI113_IC50_8h	SI113	IC50	8h	GBM3-LUC	ATP-Citrate Lyase pS454	71876
SI113_IC50_8h	SI113	IC50	8h	GBM3-LUC	ATP-Citrate Lyase pS454	54763
SI113_IC50_8h	SI113	IC50	8h	GBM3-LUC	ATP-Citrate Lyase pS454	54699.7
SI113_IC50_2h	SI113	IC50	2h	GBM3-LUC	ATP-Citrate Lyase pS454	72644.3
SI113_IC50_2h	SI113	IC50	2h	GBM3-LUC	ATP-Citrate Lyase pS454	65348.3
SI113_IC50_2h	SI113	IC50	2h	GBM3-LUC	ATP-Citrate Lyase pS454	59255.3
SI113_IC50_8h	SI113	IC50	8h	GBM3-LUC	BAD pS112	13985.3
SI113_IC50_8h	SI113	IC50	8h	GBM3-LUC	BAD pS112	11596.7
SI113_IC50_8h	SI113	IC50	8h	GBM3-LUC	BAD pS112	13406.3
SI113_IC50_2h	SI113	IC50	2h	GBM3-LUC	BAD pS112	10238
SI113_IC50_2h	SI113	IC50	2h	GBM3-LUC	BAD pS112	9604
SI113_IC50_2h	SI113	IC50	2h	GBM3-LUC	BAD pS112	8619.67
SI113_IC50_8h	SI113	IC50	8h	GBM3-LUC	BAD pS155	25633
[truncated: 1,457 more rows]
